# Supplementary material for: Characterization of age-associated gene expression changes in mouse sweat glands
Source: Aging (Albany NY). 2024 Apr 17;16(8):6717–30. doi: 10.18632/aging.205776 (PMC11087089; doi:10.18632/aging.205776)
Supplement: Supplementary Table 1 [file aging-16-205776-s001.xlsx]

## Sheet: Genes Dn in Tabby
Supplementary Table 1. mRNAs showing differential expression levels between Tabby and wild-type footpad skin.
Gene_Name	Gene_ID	baseMean	FC (Ta/WT)	FC (WT/Ta)	padj	Description
Atp6v1b1	ENSMUSG00000006269	5615.65	3.39155e-05	29485.1	7.04e-34	ATPase, H+ transporting, lysosomal V1 subunit B1 [Source:MGI Symbol;Acc:MGI:103285]
Foxi1	ENSMUSG00000047861	734.835	0.000133067	7515.01	4.19e-25	forkhead box I1 [Source:MGI Symbol;Acc:MGI:1096329]
Tmem213	ENSMUSG00000029829	271.278	0.000360358	2775.02	9.59e-20	transmembrane protein 213 [Source:MGI Symbol;Acc:MGI:1924772]
Oit1	ENSMUSG00000021749	104.838	0.000932241	1072.68	6.6e-15	oncoprotein induced transcript 1 [Source:MGI Symbol;Acc:MGI:1201784]
Wdr72	ENSMUSG00000044976	167.696	0.00113673	879.718	3.04e-14	WD repeat domain 72 [Source:MGI Symbol;Acc:MGI:3583957]
Slc26a4	ENSMUSG00000020651	167.591	0.00113781	878.881	2.71e-14	solute carrier family 26, member 4 [Source:MGI Symbol;Acc:MGI:1346029]
Cxcl17	ENSMUSG00000060188	69.6631	0.0014029	712.807	4.89e-13	chemokine (C-X-C motif) ligand 17 [Source:MGI Symbol;Acc:MGI:2387642]
Dynap	ENSMUSG00000024512	126.766	0.00150436	664.735	4.43e-13	dynactin associated protein [Source:MGI Symbol;Acc:MGI:1922827]
Krt79	ENSMUSG00000061397	5824.44	0.00152101	657.459	6.05e-250	keratin 79 [Source:MGI Symbol;Acc:MGI:2385030]
Chst9	ENSMUSG00000047161	59.3381	0.00164698	607.172	5.12e-12	carbohydrate (N-acetylgalactosamine 4-0) sulfotransferase 9 [Source:MGI Symbol;Acc:MGI:1918617]
Vtcn1	ENSMUSG00000051076	54.6957	0.00178791	559.312	5.15e-12	V-set domain containing T cell activation inhibitor 1 [Source:MGI Symbol;Acc:MGI:3039619]
Foxa1	ENSMUSG00000035451	49.2582	0.00198529	503.706	1.72e-11	forkhead box A1 [Source:MGI Symbol;Acc:MGI:1347472]
Clic6	ENSMUSG00000022949	1450.23	0.00231125	432.665	6.75e-130	chloride intracellular channel 6 [Source:MGI Symbol;Acc:MGI:2146607]
Rhcg	ENSMUSG00000030549	180.926	0.00292821	341.505	3.75e-20	Rhesus blood group-associated C glycoprotein [Source:MGI Symbol;Acc:MGI:1888517]
Klk1	ENSMUSG00000063903	279.263	0.00335602	297.972	0.000178629	kallikrein 1 [Source:MGI Symbol;Acc:MGI:102850]
Lrrc26	ENSMUSG00000026961	345.892	0.00358502	278.939	1.94e-44	leucine rich repeat containing 26 [Source:MGI Symbol;Acc:MGI:2385129]
5430419D17Rik	ENSMUSG00000006204	336.078	0.00473862	211.032	1.16e-46	RIKEN cDNA 5430419D17 gene [Source:MGI Symbol;Acc:MGI:1918645]
Sidt1	ENSMUSG00000022696	481.37	0.00479397	208.596	6.9e-70	SID1 transmembrane family, member 1 [Source:MGI Symbol;Acc:MGI:2443155]
Slain1	ENSMUSG00000055717	37.5864	0.00508882	196.509	3.4e-08	SLAIN motif family, member 1 [Source:MGI Symbol;Acc:MGI:2145578]
Pglyrp1	ENSMUSG00000030413	1811.85	0.00601313	166.303	6.05e-208	peptidoglycan recognition protein 1 [Source:MGI Symbol;Acc:MGI:1345092]
Ppp1r1b	ENSMUSG00000061718	1473.6	0.00648288	154.252	2.32e-30	protein phosphatase 1, regulatory (inhibitor) subunit 1B [Source:MGI Symbol;Acc:MGI:94860]
Cldn7	ENSMUSG00000018569	159.982	0.00667055	149.913	3.06e-28	claudin 7 [Source:MGI Symbol;Acc:MGI:1859285]
Elovl3	ENSMUSG00000038754	44.9655	0.0078195	127.885	8.54e-08	elongation of very long chain fatty acids (FEN1/Elo2, SUR4/Elo3, yeast)-like 3 [Source:MGI Symbol;Acc:MGI:1195976]
Cldn3	ENSMUSG00000070473	384.48	0.00878315	113.854	1.25e-75	claudin 3 [Source:MGI Symbol;Acc:MGI:1329044]
Fbp1	ENSMUSG00000069805	219.209	0.00976396	102.417	3.08e-43	fructose bisphosphatase 1 [Source:MGI Symbol;Acc:MGI:95492]
Slc26a7	ENSMUSG00000040569	48.3001	0.0111442	89.7331	5.58e-11	solute carrier family 26, member 7 [Source:MGI Symbol;Acc:MGI:2384791]
Cyp2b10	ENSMUSG00000030483	179.633	0.0120349	83.0918	1.59e-05	cytochrome P450, family 2, subfamily b, polypeptide 10 [Source:MGI Symbol;Acc:MGI:88598]
Krt18	ENSMUSG00000023043	1209.94	0.0122451	81.6654	3.25e-209	keratin 18 [Source:MGI Symbol;Acc:MGI:96692]
Krt8	ENSMUSG00000049382	1289.22	0.0127688	78.316	6.91e-206	keratin 8 [Source:MGI Symbol;Acc:MGI:96705]
Nxf7	ENSMUSG00000031410	39.995	0.0134998	74.0754	1.52e-09	nuclear RNA export factor 7 [Source:MGI Symbol;Acc:MGI:2159343]
Plekhs1	ENSMUSG00000035818	36.3897	0.0146929	68.0603	2.5e-09	pleckstrin homology domain containing, family S member 1 [Source:MGI Symbol;Acc:MGI:2443041]
Fxyd2	ENSMUSG00000059412	8780.98	0.0161623	61.8723	2.39e-280	FXYD domain-containing ion transport regulator 2 [Source:MGI Symbol;Acc:MGI:1195260]
Bpifb3	ENSMUSG00000068008	179.326	0.0168573	59.3215	4.85e-42	BPI fold containing family B, member 3 [Source:MGI Symbol;Acc:MGI:2675077]
Kcnq1	ENSMUSG00000009545	406.088	0.0182478	54.8011	2.07e-91	potassium voltage-gated channel, subfamily Q, member 1 [Source:MGI Symbol;Acc:MGI:108083]
Atp2a3	ENSMUSG00000020788	15363.6	0.0191254	52.2864	3.25e-307	ATPase, Ca++ transporting, ubiquitous [Source:MGI Symbol;Acc:MGI:1194503]
Adcy8	ENSMUSG00000022376	196.309	0.0221206	45.2068	2.36e-51	adenylate cyclase 8 [Source:MGI Symbol;Acc:MGI:1341110]
Kit	ENSMUSG00000005672	1742.56	0.0224991	44.4462	5.29e-33	KIT proto-oncogene receptor tyrosine kinase [Source:MGI Symbol;Acc:MGI:96677]
Rasef	ENSMUSG00000043003	55.7232	0.022895	43.6776	1.26e-15	RAS and EF hand domain containing [Source:MGI Symbol;Acc:MGI:2448565]
Kcne3	ENSMUSG00000035165	317.95	0.024999	40.0016	2.42e-63	potassium voltage-gated channel, Isk-related subfamily, gene 3 [Source:MGI Symbol;Acc:MGI:1891124]
Gsg1l	ENSMUSG00000046182	47.5899	0.026611	37.5785	6.83e-14	GSG1-like [Source:MGI Symbol;Acc:MGI:2685483]
Ceacam1	ENSMUSG00000074272	1989.49	0.0267228	37.4213	2.22e-233	carcinoembryonic antigen-related cell adhesion molecule 1 [Source:MGI Symbol;Acc:MGI:1347245]
Wfdc2	ENSMUSG00000017723	528.797	0.0267527	37.3794	1.06e-121	WAP four-disulfide core domain 2 [Source:MGI Symbol;Acc:MGI:1914951]
Lcp2	ENSMUSG00000002699	586.517	0.0272918	36.641	1.97e-142	lymphocyte cytosolic protein 2 [Source:MGI Symbol;Acc:MGI:1321402]
Cyp2a5	ENSMUSG00000005547	192.231	0.0273022	36.627	2.6e-54	cytochrome P450, family 2, subfamily a, polypeptide 5 [Source:MGI Symbol;Acc:MGI:88597]
Plekhd1	ENSMUSG00000066438	58.8134	0.027613	36.2148	1.3e-17	pleckstrin homology domain containing, family D (with coiled-coil domains) member 1 [Source:MGI Symbol;Acc:MGI:3036228]
Chrm3	ENSMUSG00000046159	270.137	0.0280974	35.5905	5.13e-16	cholinergic receptor, muscarinic 3, cardiac [Source:MGI Symbol;Acc:MGI:88398]
Ceacam2	ENSMUSG00000054385	478.415	0.0294773	33.9244	2.06e-103	carcinoembryonic antigen-related cell adhesion molecule 2 [Source:MGI Symbol;Acc:MGI:1347246]
Kcnn4	ENSMUSG00000054342	843.975	0.0336061	29.7565	2.03e-108	potassium intermediate/small conductance calcium-activated channel, subfamily N, member 4 [Source:MGI Symbol;Acc:MGI:1277957]
Tfcp2l1	ENSMUSG00000026380	3349.81	0.0353794	28.265	1.79e-300	transcription factor CP2-like 1 [Source:MGI Symbol;Acc:MGI:2444691]
Klhdc7a	ENSMUSG00000078234	606.005	0.0366353	27.2961	2.5e-27	kelch domain containing 7A [Source:MGI Symbol;Acc:MGI:2444612]
Krt19	ENSMUSG00000020911	1354.34	0.0390973	25.5772	2.57e-126	keratin 19 [Source:MGI Symbol;Acc:MGI:96693]
Rab17	ENSMUSG00000026304	149.567	0.0394538	25.3461	5.86e-40	RAB17, member RAS oncogene family [Source:MGI Symbol;Acc:MGI:104640]
Acss1	ENSMUSG00000027452	2074.66	0.0397667	25.1466	2.02e-210	acyl-CoA synthetase short-chain family member 1 [Source:MGI Symbol;Acc:MGI:1915988]
Thbs1	ENSMUSG00000040152	4591.67	0.0401683	24.8952	2.16e-43	thrombospondin 1 [Source:MGI Symbol;Acc:MGI:98737]
Palm2	ENSMUSG00000090053	35.444	0.040555	24.6579	3.98e-10	paralemmin 2 [Source:MGI Symbol;Acc:MGI:1934601]
Kcnmb2	ENSMUSG00000037610	48.4227	0.0423951	23.5876	1.76e-12	potassium large conductance calcium-activated channel, subfamily M, beta member 2 [Source:MGI Symbol;Acc:MGI:1919663]
Slc5a8	ENSMUSG00000020062	133.933	0.043698	22.8843	0.00104085	solute carrier family 5 (iodide transporter), member 8 [Source:MGI Symbol;Acc:MGI:2384916]
Cldn8	ENSMUSG00000050520	591.672	0.0450122	22.2162	1.88e-121	claudin 8 [Source:MGI Symbol;Acc:MGI:1859286]
Mlph	ENSMUSG00000026303	604.441	0.0451914	22.1281	5.79e-84	melanophilin [Source:MGI Symbol;Acc:MGI:2176380]
Shisa7	ENSMUSG00000053550	94.7489	0.046685	21.4202	9.51e-27	shisa family member 7 [Source:MGI Symbol;Acc:MGI:3605641]
Best2	ENSMUSG00000052819	670.926	0.051706	19.3401	3.57e-117	bestrophin 2 [Source:MGI Symbol;Acc:MGI:2387588]
Eif4e1b	ENSMUSG00000074895	38.9042	0.0525694	19.0225	5.09e-12	eukaryotic translation initiation factor 4E family member 1B [Source:MGI Symbol;Acc:MGI:2685119]
Ccdc160	ENSMUSG00000073207	60.6256	0.0561167	17.82	4.23e-15	coiled-coil domain containing 160 [Source:MGI Symbol;Acc:MGI:3588225]
Irx1	ENSMUSG00000060969	92.5298	0.0583353	17.1423	3.14e-24	Iroquois related homeobox 1 (Drosophila) [Source:MGI Symbol;Acc:MGI:1197515]
Ildr1	ENSMUSG00000022900	234.964	0.0583821	17.1285	7.36e-51	immunoglobulin-like domain containing receptor 1 [Source:MGI Symbol;Acc:MGI:2146574]
Adgrl3	ENSMUSG00000037605	93.5008	0.0599528	16.6798	1.13e-25	adhesion G protein-coupled receptor L3 [Source:MGI Symbol;Acc:MGI:2441950]
Slc44a3	ENSMUSG00000039865	191.698	0.0615057	16.2587	4.59e-48	solute carrier family 44, member 3 [Source:MGI Symbol;Acc:MGI:2384860]
Vipr1	ENSMUSG00000032528	1293.71	0.0643647	15.5365	1.69e-158	vasoactive intestinal peptide receptor 1 [Source:MGI Symbol;Acc:MGI:109272]
Smim22	ENSMUSG00000096215	34.7313	0.0646619	15.4651	1.77e-09	small integral membrane protein 22 [Source:MGI Symbol;Acc:MGI:3643379]
Mfsd4a	ENSMUSG00000059149	3197.69	0.065099	15.3612	6.68e-25	major facilitator superfamily domain containing 4A [Source:MGI Symbol;Acc:MGI:2442786]
Rhpn2	ENSMUSG00000030494	286.381	0.067172	14.8872	1.13e-66	rhophilin, Rho GTPase binding protein 2 [Source:MGI Symbol;Acc:MGI:1289234]
Chrm1	ENSMUSG00000032773	275.425	0.0672575	14.8682	2.29e-73	cholinergic receptor, muscarinic 1, CNS [Source:MGI Symbol;Acc:MGI:88396]
Gprc5a	ENSMUSG00000046733	249.918	0.0697023	14.3467	1.85e-43	G protein-coupled receptor, family C, group 5, member A [Source:MGI Symbol;Acc:MGI:1891250]
3110079O15Rik	ENSMUSG00000026258	27.0955	0.0704528	14.1939	3.71e-07	RIKEN cDNA 3110079O15 gene [Source:MGI Symbol;Acc:MGI:1920484]
Ncald	ENSMUSG00000051359	602.131	0.0718989	13.9084	7.21e-119	neurocalcin delta [Source:MGI Symbol;Acc:MGI:1196326]
Map3k21	ENSMUSG00000031853	64.2979	0.0747768	13.3731	8.19e-16	mitogen-activated protein kinase kinase kinase 21 [Source:MGI Symbol;Acc:MGI:2385307]
Chst10	ENSMUSG00000026080	60.6173	0.0758883	13.1773	7.57e-15	carbohydrate sulfotransferase 10 [Source:MGI Symbol;Acc:MGI:2138283]
Stra6	ENSMUSG00000032327	510.524	0.0789864	12.6604	4.09e-79	stimulated by retinoic acid gene 6 [Source:MGI Symbol;Acc:MGI:107742]
Spink12	ENSMUSG00000061144	421.432	0.0805378	12.4165	0.00400915	serine peptidase inhibitor, Kazal type 12 [Source:MGI Symbol;Acc:MGI:1925492]
Plppr4	ENSMUSG00000044667	44.1029	0.0816064	12.2539	1.48e-11	phospholipid phosphatase related 4 [Source:MGI Symbol;Acc:MGI:106530]
Runx3	ENSMUSG00000070691	236.586	0.0884926	11.3004	8.24e-50	runt related transcription factor 3 [Source:MGI Symbol;Acc:MGI:102672]
S100b	ENSMUSG00000033208	998.291	0.0893887	11.1871	3.29e-140	S100 protein, beta polypeptide, neural [Source:MGI Symbol;Acc:MGI:98217]
H2-Q10	ENSMUSG00000067235	225.439	0.0898109	11.1345	2e-50	histocompatibility 2, Q region locus 10 [Source:MGI Symbol;Acc:MGI:95929]
Upb1	ENSMUSG00000033427	29.435	0.0930039	10.7522	4.65e-07	ureidopropionase, beta [Source:MGI Symbol;Acc:MGI:2143535]
Greb1l	ENSMUSG00000042942	50.0622	0.0932371	10.7253	4.78e-13	growth regulation by estrogen in breast cancer-like [Source:MGI Symbol;Acc:MGI:3576497]
Tex15	ENSMUSG00000009628	57.1546	0.0945472	10.5767	4.62e-12	testis expressed gene 15 [Source:MGI Symbol;Acc:MGI:1934816]
Pde9a	ENSMUSG00000041119	283.846	0.094906	10.5367	5.54e-51	phosphodiesterase 9A [Source:MGI Symbol;Acc:MGI:1277179]
Plscr2	ENSMUSG00000032372	51.1889	0.0953248	10.4904	9.13e-13	phospholipid scramblase 2 [Source:MGI Symbol;Acc:MGI:1270860]
Ccdc33	ENSMUSG00000037716	28.934	0.0976244	10.2433	6.43e-05	coiled-coil domain containing 33 [Source:MGI Symbol;Acc:MGI:1922464]
Foxc1	ENSMUSG00000050295	287.965	0.101256	9.87597	1.2e-52	forkhead box C1 [Source:MGI Symbol;Acc:MGI:1347466]
Hid1	ENSMUSG00000034586	768.526	0.102054	9.79876	6.14e-74	HID1 domain containing [Source:MGI Symbol;Acc:MGI:2445087]
Cadps2	ENSMUSG00000017978	57.5726	0.104515	9.568	8.21e-10	Ca2+-dependent activator protein for secretion 2 [Source:MGI Symbol;Acc:MGI:2443963]
Cutal	ENSMUSG00000026870	56.4756	0.105158	9.50953	4.31e-10	cutA divalent cation tolerance homolog-like [Source:MGI Symbol;Acc:MGI:1925246]
Kcnk5	ENSMUSG00000023243	1881.86	0.110271	9.06858	7.78e-137	potassium channel, subfamily K, member 5 [Source:MGI Symbol;Acc:MGI:1336175]
Epha7	ENSMUSG00000028289	86.4605	0.111414	8.97554	1.39e-15	Eph receptor A7 [Source:MGI Symbol;Acc:MGI:95276]
Sox9	ENSMUSG00000000567	1323.7	0.112561	8.88407	1.62e-81	SRY (sex determining region Y)-box 9 [Source:MGI Symbol;Acc:MGI:98371]
Aox3	ENSMUSG00000064294	88.9318	0.113695	8.79546	4.57e-12	aldehyde oxidase 3 [Source:MGI Symbol;Acc:MGI:1918974]
Vamp1	ENSMUSG00000030337	5035.34	0.114184	8.7578	2.6e-240	vesicle-associated membrane protein 1 [Source:MGI Symbol;Acc:MGI:1313276]
Arhgap8	ENSMUSG00000078954	66.0088	0.119476	8.36988	9.83e-16	Rho GTPase activating protein 8 [Source:MGI Symbol;Acc:MGI:1920417]
Psca	ENSMUSG00000022598	173.935	0.121614	8.22277	0.000360697	prostate stem cell antigen [Source:MGI Symbol;Acc:MGI:1919623]
Prr15l	ENSMUSG00000047040	201.543	0.122034	8.19442	6.99e-36	proline rich 15-like [Source:MGI Symbol;Acc:MGI:2387599]
Slc6a2	ENSMUSG00000055368	460.936	0.122846	8.14027	2.31e-53	solute carrier family 6 (neurotransmitter transporter, noradrenalin), member 2 [Source:MGI Symbol;Acc:MGI:1270850]
Pirt	ENSMUSG00000048070	39.4002	0.123551	8.09383	4.79e-07	phosphoinositide-interacting regulator of transient receptor potential channels [Source:MGI Symbol;Acc:MGI:2443635]
Grin1	ENSMUSG00000026959	106.18	0.131285	7.61703	1.05e-17	glutamate receptor, ionotropic, NMDA1 (zeta 1) [Source:MGI Symbol;Acc:MGI:95819]
Tesc	ENSMUSG00000029359	1246.86	0.131796	7.58746	3.34e-88	tescalcin [Source:MGI Symbol;Acc:MGI:1930803]
Lrrc66	ENSMUSG00000067206	29.4771	0.132161	7.56651	1.02e-05	leucine rich repeat containing 66 [Source:MGI Symbol;Acc:MGI:2387634]
Alcam	ENSMUSG00000022636	263.933	0.132611	7.54087	2.92e-38	activated leukocyte cell adhesion molecule [Source:MGI Symbol;Acc:MGI:1313266]
Rims3	ENSMUSG00000032890	57.0661	0.137127	7.29252	8.44e-12	regulating synaptic membrane exocytosis 3 [Source:MGI Symbol;Acc:MGI:2443331]
Shank2	ENSMUSG00000037541	327.332	0.1388	7.20459	1.04e-42	SH3/ankyrin domain gene 2 [Source:MGI Symbol;Acc:MGI:2671987]
Inhbb	ENSMUSG00000037035	677.109	0.138836	7.20273	3.7e-56	inhibin beta-B [Source:MGI Symbol;Acc:MGI:96571]
Plin2	ENSMUSG00000028494	4428.94	0.144215	6.93408	2.39e-203	perilipin 2 [Source:MGI Symbol;Acc:MGI:87920]
Tmprss2	ENSMUSG00000000385	348.03	0.1453	6.88232	2.14e-60	transmembrane protease, serine 2 [Source:MGI Symbol;Acc:MGI:1354381]
Ptpn18	ENSMUSG00000026126	388.535	0.145394	6.87787	8.25e-59	protein tyrosine phosphatase, non-receptor type 18 [Source:MGI Symbol;Acc:MGI:108410]
Plcb1	ENSMUSG00000051177	159.202	0.145588	6.8687	1.39e-18	phospholipase C, beta 1 [Source:MGI Symbol;Acc:MGI:97613]
Ctnnd2	ENSMUSG00000022240	47.1139	0.146352	6.83282	3.45e-06	catenin (cadherin associated protein), delta 2 [Source:MGI Symbol;Acc:MGI:1195966]
Slc20a1	ENSMUSG00000027397	6085.98	0.14703	6.80135	1.79e-161	solute carrier family 20, member 1 [Source:MGI Symbol;Acc:MGI:108392]
Galm	ENSMUSG00000035473	342.554	0.147636	6.77342	2.42e-34	galactose mutarotase [Source:MGI Symbol;Acc:MGI:2442420]
Vsig8	ENSMUSG00000049598	57.0452	0.148179	6.7486	1.91e-07	V-set and immunoglobulin domain containing 8 [Source:MGI Symbol;Acc:MGI:3642995]
Ggt1	ENSMUSG00000006345	34.3565	0.149284	6.69864	2.75e-07	gamma-glutamyltransferase 1 [Source:MGI Symbol;Acc:MGI:95706]
0610040J01Rik	ENSMUSG00000060512	76.0353	0.151401	6.60496	1.46e-13	RIKEN cDNA 0610040J01 gene [Source:MGI Symbol;Acc:MGI:1923511]
Ret	ENSMUSG00000030110	444.793	0.152053	6.57666	1.06e-28	ret proto-oncogene [Source:MGI Symbol;Acc:MGI:97902]
Plcb4	ENSMUSG00000039943	777.655	0.155114	6.44685	6.87e-65	phospholipase C, beta 4 [Source:MGI Symbol;Acc:MGI:107464]
Gabrp	ENSMUSG00000020159	117.341	0.156959	6.37107	2.22e-20	gamma-aminobutyric acid (GABA) A receptor, pi [Source:MGI Symbol;Acc:MGI:2387597]
Slco1a5	ENSMUSG00000063975	118.211	0.157242	6.35962	2.01e-19	solute carrier organic anion transporter family, member 1a5 [Source:MGI Symbol;Acc:MGI:1351865]
Fbxo2	ENSMUSG00000041556	119.019	0.159623	6.26474	1.58e-19	F-box protein 2 [Source:MGI Symbol;Acc:MGI:2446216]
Paqr6	ENSMUSG00000041423	362.013	0.161726	6.1833	1.29e-57	progestin and adipoQ receptor family member VI [Source:MGI Symbol;Acc:MGI:1916207]
Slc12a2	ENSMUSG00000024597	6347.42	0.162133	6.16776	1.35e-125	solute carrier family 12, member 2 [Source:MGI Symbol;Acc:MGI:101924]
Gm266	ENSMUSG00000010529	28.0406	0.162265	6.16277	0.0015391	predicted gene 266 [Source:MGI Symbol;Acc:MGI:2685112]
Col9a3	ENSMUSG00000027570	80.2688	0.162513	6.15335	3.13e-14	collagen, type IX, alpha 3 [Source:MGI Symbol;Acc:MGI:894686]
Cyp2f2	ENSMUSG00000052974	2236.12	0.163096	6.13135	7.23e-42	cytochrome P450, family 2, subfamily f, polypeptide 2 [Source:MGI Symbol;Acc:MGI:88608]
Eya2	ENSMUSG00000017897	257.273	0.163098	6.13128	1.93e-40	EYA transcriptional coactivator and phosphatase 2 [Source:MGI Symbol;Acc:MGI:109341]
Gpx2	ENSMUSG00000042808	436.954	0.16351	6.11584	1.85e-34	glutathione peroxidase 2 [Source:MGI Symbol;Acc:MGI:106609]
Myo5c	ENSMUSG00000033590	622.369	0.163754	6.10671	1.02e-57	myosin VC [Source:MGI Symbol;Acc:MGI:2442485]
Pkp2	ENSMUSG00000041957	128.147	0.16466	6.07312	2.47e-20	plakophilin 2 [Source:MGI Symbol;Acc:MGI:1914701]
Gpr37	ENSMUSG00000039904	34.3851	0.165836	6.03004	1.04e-06	G protein-coupled receptor 37 [Source:MGI Symbol;Acc:MGI:1313297]
Ccbe1	ENSMUSG00000046318	99.6963	0.166091	6.0208	7.05e-13	collagen and calcium binding EGF domains 1 [Source:MGI Symbol;Acc:MGI:2445053]
Cnn1	ENSMUSG00000001349	1336.77	0.166172	6.01786	3.67e-68	calponin 1 [Source:MGI Symbol;Acc:MGI:104979]
Fam65b	ENSMUSG00000036006	108.521	0.169503	5.89959	4.39e-15	family with sequence similarity 65, member B [Source:MGI Symbol;Acc:MGI:2444879]
Wfdc18	ENSMUSG00000000983	896.866	0.171205	5.84096	9.23e-50	WAP four-disulfide core domain 18 [Source:MGI Symbol;Acc:MGI:107506]
Kif26b	ENSMUSG00000026494	127.239	0.175572	5.69567	8.21e-21	kinesin family member 26B [Source:MGI Symbol;Acc:MGI:2447076]
B4galnt1	ENSMUSG00000006731	591.148	0.176988	5.6501	2.84e-58	beta-1,4-N-acetyl-galactosaminyl transferase 1 [Source:MGI Symbol;Acc:MGI:1342057]
Shisa8	ENSMUSG00000096883	37.2885	0.178442	5.60405	1.64e-06	shisa family member 8 [Source:MGI Symbol;Acc:MGI:2146080]
Exoc3l4	ENSMUSG00000021280	88.3518	0.180251	5.54782	1.08e-12	exocyst complex component 3-like 4 [Source:MGI Symbol;Acc:MGI:1921363]
Slc4a4	ENSMUSG00000060961	176.299	0.181761	5.50173	1.57e-13	solute carrier family 4 (anion exchanger), member 4 [Source:MGI Symbol;Acc:MGI:1927555]
Sorl1	ENSMUSG00000049313	1856.02	0.182764	5.47154	1.16e-61	sortilin-related receptor, LDLR class A repeats-containing [Source:MGI Symbol;Acc:MGI:1202296]
Iqgap2	ENSMUSG00000021676	650.567	0.184693	5.41439	2.03e-44	IQ motif containing GTPase activating protein 2 [Source:MGI Symbol;Acc:MGI:2449975]
Inpp5j	ENSMUSG00000034570	66.6201	0.191423	5.22403	1.32e-10	inositol polyphosphate 5-phosphatase J [Source:MGI Symbol;Acc:MGI:2158663]
St8sia6	ENSMUSG00000003418	114.905	0.192595	5.19225	5.35e-15	ST8 alpha-N-acetyl-neuraminide alpha-2,8-sialyltransferase 6 [Source:MGI Symbol;Acc:MGI:2386797]
Itgb8	ENSMUSG00000025321	76.5125	0.192923	5.18342	1.62e-12	integrin beta 8 [Source:MGI Symbol;Acc:MGI:1338035]
Akr1c14	ENSMUSG00000033715	49.0968	0.194348	5.14541	7.33e-06	aldo-keto reductase family 1, member C14 [Source:MGI Symbol;Acc:MGI:2145458]
Cracr2b	ENSMUSG00000048200	1097.75	0.196923	5.07812	4.37e-85	calcium release activated channel regulator 2B [Source:MGI Symbol;Acc:MGI:2446129]
Krt23	ENSMUSG00000006777	1122.08	0.198872	5.02837	1.58e-61	keratin 23 [Source:MGI Symbol;Acc:MGI:2148866]
Sox10	ENSMUSG00000033006	1094.63	0.200345	4.99139	2.6e-59	SRY (sex determining region Y)-box 10 [Source:MGI Symbol;Acc:MGI:98358]
Phlda1	ENSMUSG00000020205	1783.48	0.200456	4.98862	2.66e-54	pleckstrin homology like domain, family A, member 1 [Source:MGI Symbol;Acc:MGI:1096880]
Nkd2	ENSMUSG00000021567	1148.66	0.201388	4.96554	5.42e-62	naked cuticle 2 homolog (Drosophila) [Source:MGI Symbol;Acc:MGI:1919543]
Cryba4	ENSMUSG00000066975	48.4146	0.202643	4.9348	9.07e-08	crystallin, beta A4 [Source:MGI Symbol;Acc:MGI:102716]
Aire	ENSMUSG00000000731	43.7252	0.204882	4.88087	3.81e-07	autoimmune regulator (autoimmune polyendocrinopathy candidiasis ectodermal dystrophy) [Source:MGI Symbol;Acc:MGI:1338803]
Stk39	ENSMUSG00000027030	1542.96	0.205466	4.86699	3.62e-79	serine/threonine kinase 39 [Source:MGI Symbol;Acc:MGI:1858416]
Gmds	ENSMUSG00000038372	224.111	0.206685	4.83827	5.56e-20	GDP-mannose 4, 6-dehydratase [Source:MGI Symbol;Acc:MGI:1891112]
Etnk2	ENSMUSG00000070644	87.9171	0.208928	4.78634	4.47e-08	ethanolamine kinase 2 [Source:MGI Symbol;Acc:MGI:2443760]
Dusp4	ENSMUSG00000031530	110.846	0.209508	4.77308	2.21e-12	dual specificity phosphatase 4 [Source:MGI Symbol;Acc:MGI:2442191]
Slc25a36	ENSMUSG00000032449	2038.04	0.209959	4.76283	4.52e-76	solute carrier family 25, member 36 [Source:MGI Symbol;Acc:MGI:1924909]
Pcp4	ENSMUSG00000090223	73.8151	0.209996	4.76199	1.42e-10	Purkinje cell protein 4 [Source:MGI Symbol;Acc:MGI:97509]
Fads2	ENSMUSG00000024665	423.21	0.21067	4.74676	1.17e-42	fatty acid desaturase 2 [Source:MGI Symbol;Acc:MGI:1930079]
Nbea	ENSMUSG00000027799	259.135	0.211973	4.71758	1.1e-28	neurobeachin [Source:MGI Symbol;Acc:MGI:1347075]
Igsf5	ENSMUSG00000000159	67.5663	0.214061	4.67157	8.24e-09	immunoglobulin superfamily, member 5 [Source:MGI Symbol;Acc:MGI:1919308]
Dact2	ENSMUSG00000048826	280.578	0.214362	4.665	5.91e-32	dishevelled-binding antagonist of beta-catenin 2 [Source:MGI Symbol;Acc:MGI:1920347]
Scube3	ENSMUSG00000038677	84.4703	0.216185	4.62566	1.79e-09	signal peptide, CUB domain, EGF-like 3 [Source:MGI Symbol;Acc:MGI:3045253]
Runx2	ENSMUSG00000039153	56.6441	0.217334	4.6012	0.000145327	runt related transcription factor 2 [Source:MGI Symbol;Acc:MGI:99829]
Pgf	ENSMUSG00000004791	218.425	0.217564	4.59634	1.56e-17	placental growth factor [Source:MGI Symbol;Acc:MGI:105095]
Eda	ENSMUSG00000059327	87.209	0.21889	4.5685	4.7e-10	ectodysplasin-A [Source:MGI Symbol;Acc:MGI:1195272]
Dnajc6	ENSMUSG00000028528	132.188	0.221811	4.50834	3.26e-16	DnaJ heat shock protein family (Hsp40) member C6 [Source:MGI Symbol;Acc:MGI:1919935]
Osr1	ENSMUSG00000048387	249.325	0.222775	4.48884	6.39e-22	odd-skipped related 1 (Drosophila) [Source:MGI Symbol;Acc:MGI:1344424]
Tmem37	ENSMUSG00000050777	162.893	0.223515	4.47397	3.44e-17	transmembrane protein 37 [Source:MGI Symbol;Acc:MGI:2157899]
Slc43a2	ENSMUSG00000038178	1208.94	0.2262	4.42086	1.02e-40	solute carrier family 43, member 2 [Source:MGI Symbol;Acc:MGI:2442746]
Cd164l2	ENSMUSG00000028865	34.1535	0.230064	4.34662	0.000127134	CD164 sialomucin-like 2 [Source:MGI Symbol;Acc:MGI:1916905]
Rspo1	ENSMUSG00000028871	77.8685	0.232159	4.3074	1.22e-10	R-spondin 1 [Source:MGI Symbol;Acc:MGI:2183426]
Pakap	ENSMUSG00000089945	1043.34	0.234309	4.26787	6.79e-45	paralemmin A kinase anchor protein [Source:MGI Symbol;Acc:MGI:5141924]
Tbc1d30	ENSMUSG00000052302	50.8191	0.237788	4.20542	8.4e-07	TBC1 domain family, member 30 [Source:MGI Symbol;Acc:MGI:1921944]
Akap2	ENSMUSG00000038729	1012.28	0.242226	4.12837	8.51e-43	A kinase (PRKA) anchor protein 2 [Source:MGI Symbol;Acc:MGI:1306795]
Cck	ENSMUSG00000032532	94.459	0.245423	4.07461	3.07e-10	cholecystokinin [Source:MGI Symbol;Acc:MGI:88297]
Notum	ENSMUSG00000042988	175.4	0.246973	4.04902	5.87e-18	notum pectinacetylesterase homolog (Drosophila) [Source:MGI Symbol;Acc:MGI:1924833]
Cgnl1	ENSMUSG00000032232	1882.7	0.247127	4.04651	2.86e-45	cingulin-like 1 [Source:MGI Symbol;Acc:MGI:1915428]
Nyap1	ENSMUSG00000045348	49.1208	0.250687	3.98904	1.23e-05	neuronal tyrosine-phosphorylated phosphoinositide 3-kinase adaptor 1 [Source:MGI Symbol;Acc:MGI:2443880]
Rap1gap2	ENSMUSG00000038807	400.434	0.251872	3.97027	6.56e-24	RAP1 GTPase activating protein 2 [Source:MGI Symbol;Acc:MGI:3028623]
Runx1	ENSMUSG00000022952	697.715	0.252522	3.96005	1.09e-33	runt related transcription factor 1 [Source:MGI Symbol;Acc:MGI:99852]
Dixdc1	ENSMUSG00000032064	267.576	0.255433	3.91492	1.09e-16	DIX domain containing 1 [Source:MGI Symbol;Acc:MGI:2679721]
Lrrc75b	ENSMUSG00000046807	135.064	0.256939	3.89197	3.08e-14	leucine rich repeat containing 75B [Source:MGI Symbol;Acc:MGI:2143657]
Rab4a	ENSMUSG00000019478	289.64	0.257932	3.877	4.24e-23	RAB4A, member RAS oncogene family [Source:MGI Symbol;Acc:MGI:105069]
Ybx2	ENSMUSG00000018554	789.258	0.258462	3.86905	7.23e-42	Y box protein 2 [Source:MGI Symbol;Acc:MGI:1096372]
Sgk1	ENSMUSG00000019970	6220.14	0.259478	3.8539	5.96e-63	serum/glucocorticoid regulated kinase 1 [Source:MGI Symbol;Acc:MGI:1340062]
Ltbp2	ENSMUSG00000002020	524.311	0.259983	3.84641	8.52e-17	latent transforming growth factor beta binding protein 2 [Source:MGI Symbol;Acc:MGI:99502]
Mylk	ENSMUSG00000022836	1543.69	0.261368	3.82602	1.19e-32	myosin, light polypeptide kinase [Source:MGI Symbol;Acc:MGI:894806]
Mgat4a	ENSMUSG00000026110	775.138	0.263163	3.79992	5.2e-28	mannoside acetylglucosaminyltransferase 4, isoenzyme A [Source:MGI Symbol;Acc:MGI:2662992]
Kitl	ENSMUSG00000019966	400.515	0.263914	3.78912	1.16e-20	kit ligand [Source:MGI Symbol;Acc:MGI:96974]
Zfp239	ENSMUSG00000042097	91.9392	0.26417	3.78544	6.97e-08	zinc finger protein 239 [Source:MGI Symbol;Acc:MGI:1306812]
Timp3	ENSMUSG00000020044	8450.5	0.265814	3.76203	8.55e-51	tissue inhibitor of metalloproteinase 3 [Source:MGI Symbol;Acc:MGI:98754]
Csrp2	ENSMUSG00000020186	513.299	0.266167	3.75704	7.4e-41	cysteine and glycine-rich protein 2 [Source:MGI Symbol;Acc:MGI:1202907]
Atp1b1	ENSMUSG00000026576	12004	0.266306	3.75508	4.23e-62	ATPase, Na+/K+ transporting, beta 1 polypeptide [Source:MGI Symbol;Acc:MGI:88108]
Esrrg	ENSMUSG00000026610	286.566	0.270765	3.69324	6e-10	estrogen-related receptor gamma [Source:MGI Symbol;Acc:MGI:1347056]
Mpped2	ENSMUSG00000016386	43.9617	0.272397	3.67111	7.96e-05	metallophosphoesterase domain containing 2 [Source:MGI Symbol;Acc:MGI:1924265]
Rasd1	ENSMUSG00000049892	290.428	0.274468	3.64341	4.94e-13	RAS, dexamethasone-induced 1 [Source:MGI Symbol;Acc:MGI:1270848]
Armcx4	ENSMUSG00000049804	433.712	0.2752	3.63372	1.01e-19	armadillo repeat containing, X-linked 4 [Source:MGI Symbol;Acc:MGI:2147887]
5430416O09Rik	ENSMUSG00000028475	65.2961	0.275514	3.62958	4.71e-06	RIKEN cDNA 5430416O09 gene [Source:MGI Symbol;Acc:MGI:1918656]
Cda	ENSMUSG00000028755	33.4613	0.277429	3.60453	0.00259489	cytidine deaminase [Source:MGI Symbol;Acc:MGI:1919519]
Col25a1	ENSMUSG00000058897	40.5237	0.279242	3.58112	0.000116263	collagen, type XXV, alpha 1 [Source:MGI Symbol;Acc:MGI:1924268]
Mansc1	ENSMUSG00000032718	336.268	0.282347	3.54174	3.93e-24	MANSC domain containing 1 [Source:MGI Symbol;Acc:MGI:1914979]
Ptprj	ENSMUSG00000025314	971.142	0.282903	3.53479	3.87e-42	protein tyrosine phosphatase, receptor type, J [Source:MGI Symbol;Acc:MGI:104574]
Itpr1	ENSMUSG00000030102	717.503	0.285329	3.50473	7.27e-35	inositol 1,4,5-trisphosphate receptor 1 [Source:MGI Symbol;Acc:MGI:96623]
4930402H24Rik	ENSMUSG00000027309	586.934	0.288115	3.47084	7.01e-29	RIKEN cDNA 4930402H24 gene [Source:MGI Symbol;Acc:MGI:1923029]
Traf4	ENSMUSG00000017386	542.51	0.292376	3.42025	1.3e-28	TNF receptor associated factor 4 [Source:MGI Symbol;Acc:MGI:1202880]
Rasl11b	ENSMUSG00000049907	782.215	0.293697	3.40486	5.34e-24	RAS-like, family 11, member B [Source:MGI Symbol;Acc:MGI:1916189]
Enpp5	ENSMUSG00000023960	379.347	0.297653	3.35961	1.76e-22	ectonucleotide pyrophosphatase/phosphodiesterase 5 [Source:MGI Symbol;Acc:MGI:1933830]
Kcns1	ENSMUSG00000040164	47.001	0.299072	3.34367	0.000472359	K+ voltage-gated channel, subfamily S, 1 [Source:MGI Symbol;Acc:MGI:1197019]
Slc35a3	ENSMUSG00000027957	1308.41	0.299561	3.33822	8.08e-55	solute carrier family 35 (UDP-N-acetylglucosamine (UDP-GlcNAc) transporter), member 3 [Source:MGI Symbol;Acc:MGI:1917648]
Car12	ENSMUSG00000032373	15680.3	0.299894	3.33452	5.78e-81	carbonic anhydrase 12 [Source:MGI Symbol;Acc:MGI:1923709]
Pcyt1b	ENSMUSG00000035246	138.941	0.300065	3.33261	4.83e-09	phosphate cytidylyltransferase 1, choline, beta isoform [Source:MGI Symbol;Acc:MGI:2147987]
Myh11	ENSMUSG00000018830	4851.84	0.300363	3.3293	2.46e-25	myosin, heavy polypeptide 11, smooth muscle [Source:MGI Symbol;Acc:MGI:102643]
Cytip	ENSMUSG00000026832	91.7517	0.300385	3.32906	7.36e-09	cytohesin 1 interacting protein [Source:MGI Symbol;Acc:MGI:2183535]
Slit2	ENSMUSG00000031558	145.568	0.301185	3.32022	1.07e-09	slit homolog 2 (Drosophila) [Source:MGI Symbol;Acc:MGI:1315205]
Clmn	ENSMUSG00000021097	1111.83	0.301497	3.31678	4.17e-25	calmin [Source:MGI Symbol;Acc:MGI:2136957]
Plk5	ENSMUSG00000035486	100.372	0.302287	3.30812	6.88e-08	polo-like kinase 5 [Source:MGI Symbol;Acc:MGI:3026984]
Wnt10b	ENSMUSG00000022996	157.114	0.302772	3.30282	1.65e-09	wingless-type MMTV integration site family, member 10B [Source:MGI Symbol;Acc:MGI:108061]
Dclk2	ENSMUSG00000028078	95.4904	0.302957	3.3008	7.94e-08	doublecortin-like kinase 2 [Source:MGI Symbol;Acc:MGI:1918012]
Ehd3	ENSMUSG00000024065	309.404	0.304986	3.27884	7.32e-13	EH-domain containing 3 [Source:MGI Symbol;Acc:MGI:1928900]
Tlr3	ENSMUSG00000031639	118.056	0.305493	3.2734	8.16e-10	toll-like receptor 3 [Source:MGI Symbol;Acc:MGI:2156367]
Plet1	ENSMUSG00000032068	936.861	0.30798	3.24697	1.77e-15	placenta expressed transcript 1 [Source:MGI Symbol;Acc:MGI:1923759]
Pip5k1b	ENSMUSG00000024867	68.7208	0.30801	3.24665	1.87e-05	phosphatidylinositol-4-phosphate 5-kinase, type 1 beta [Source:MGI Symbol;Acc:MGI:107930]
Rgl3	ENSMUSG00000040146	58.8233	0.308788	3.23847	0.000113657	ral guanine nucleotide dissociation stimulator-like 3 [Source:MGI Symbol;Acc:MGI:1918996]
Eps8	ENSMUSG00000015766	302.866	0.309252	3.23361	3.7e-09	epidermal growth factor receptor pathway substrate 8 [Source:MGI Symbol;Acc:MGI:104684]
Sorbs2	ENSMUSG00000031626	656.67	0.310932	3.21614	1.38e-15	sorbin and SH3 domain containing 2 [Source:MGI Symbol;Acc:MGI:1924574]
Irx2	ENSMUSG00000001504	454.31	0.313655	3.18821	4.04e-18	Iroquois related homeobox 2 (Drosophila) [Source:MGI Symbol;Acc:MGI:1197526]
Hk1	ENSMUSG00000037012	13928.5	0.314148	3.18321	1.35e-35	hexokinase 1 [Source:MGI Symbol;Acc:MGI:96103]
Ephb1	ENSMUSG00000032537	42.3348	0.314607	3.17857	0.00327151	Eph receptor B1 [Source:MGI Symbol;Acc:MGI:1096337]
Elf3	ENSMUSG00000003051	296.548	0.316435	3.16021	3.44e-19	E74-like factor 3 [Source:MGI Symbol;Acc:MGI:1101781]
Nol4l	ENSMUSG00000061411	173.926	0.318223	3.14245	3.92e-12	nucleolar protein 4-like [Source:MGI Symbol;Acc:MGI:1918765]
Slc25a48	ENSMUSG00000021509	572.016	0.318537	3.13935	4.24e-15	solute carrier family 25, member 48 [Source:MGI Symbol;Acc:MGI:2145373]
Crim1	ENSMUSG00000024074	1292.61	0.319053	3.13427	1.71e-28	cysteine rich transmembrane BMP regulator 1 (chordin like) [Source:MGI Symbol;Acc:MGI:1354756]
Matn4	ENSMUSG00000016995	44.9433	0.321641	3.10906	0.0033909	matrilin 4 [Source:MGI Symbol;Acc:MGI:1328314]
Shroom3	ENSMUSG00000029381	1903.99	0.324271	3.08384	2.97e-35	shroom family member 3 [Source:MGI Symbol;Acc:MGI:1351655]
Syn3	ENSMUSG00000059602	4725.87	0.326806	3.05992	1.12e-33	synapsin III [Source:MGI Symbol;Acc:MGI:1351334]
Sntb1	ENSMUSG00000060429	138.583	0.32795	3.04924	1.93e-07	syntrophin, basic 1 [Source:MGI Symbol;Acc:MGI:101781]
Sh3bp4	ENSMUSG00000036206	1012.55	0.328159	3.0473	3.47e-35	SH3-domain binding protein 4 [Source:MGI Symbol;Acc:MGI:2138297]
Cyp2d22	ENSMUSG00000061740	414.261	0.329811	3.03204	1.47e-16	cytochrome P450, family 2, subfamily d, polypeptide 22 [Source:MGI Symbol;Acc:MGI:1929474]
Edn1	ENSMUSG00000021367	284.885	0.331135	3.01991	6.55e-15	endothelin 1 [Source:MGI Symbol;Acc:MGI:95283]
Slc26a10	ENSMUSG00000040441	303.232	0.331831	3.01358	2.2e-11	solute carrier family 26, member 10 [Source:MGI Symbol;Acc:MGI:2143920]
Gng7	ENSMUSG00000048240	209.357	0.332242	3.00985	1.52e-09	guanine nucleotide binding protein (G protein), gamma 7 [Source:MGI Symbol;Acc:MGI:95787]
Fblim1	ENSMUSG00000006219	205.496	0.333275	3.00052	3.59e-15	filamin binding LIM protein 1 [Source:MGI Symbol;Acc:MGI:1921452]
Bik	ENSMUSG00000016758	98.4875	0.334933	2.98567	1.18e-06	BCL2-interacting killer [Source:MGI Symbol;Acc:MGI:1206591]
Rbpms	ENSMUSG00000031586	647.584	0.335104	2.98415	1.07e-28	RNA binding protein gene with multiple splicing [Source:MGI Symbol;Acc:MGI:1334446]
Scnn1b	ENSMUSG00000030873	1008	0.339147	2.94857	6.81e-32	sodium channel, nonvoltage-gated 1 beta [Source:MGI Symbol;Acc:MGI:104696]
Begain	ENSMUSG00000040867	57.8346	0.340492	2.93693	0.000115482	brain-enriched guanylate kinase-associated [Source:MGI Symbol;Acc:MGI:3044626]
Tns3	ENSMUSG00000020422	1660.24	0.342215	2.92214	4e-34	tensin 3 [Source:MGI Symbol;Acc:MGI:2443012]
Ppp1r9a	ENSMUSG00000032827	173.637	0.34382	2.9085	1.5e-12	protein phosphatase 1, regulatory (inhibitor) subunit 9A [Source:MGI Symbol;Acc:MGI:2442401]
Itpr2	ENSMUSG00000030287	3618.31	0.34536	2.89553	2.06e-59	inositol 1,4,5-triphosphate receptor 2 [Source:MGI Symbol;Acc:MGI:99418]
Enho	ENSMUSG00000028445	178.036	0.348441	2.86993	1.76e-12	energy homeostasis associated [Source:MGI Symbol;Acc:MGI:1916888]
Shf	ENSMUSG00000033256	356.891	0.349164	2.86398	3.11e-15	Src homology 2 domain containing F [Source:MGI Symbol;Acc:MGI:3613669]
Marveld3	ENSMUSG00000001672	377.389	0.349236	2.86339	6.81e-15	MARVEL (membrane-associating) domain containing 3 [Source:MGI Symbol;Acc:MGI:1920858]
Gne	ENSMUSG00000028479	506.509	0.350053	2.85671	1.47e-15	glucosamine (UDP-N-acetyl)-2-epimerase/N-acetylmannosamine kinase [Source:MGI Symbol;Acc:MGI:1354951]
Kctd14	ENSMUSG00000051727	96.4732	0.351668	2.84359	1.37e-05	potassium channel tetramerisation domain containing 14 [Source:MGI Symbol;Acc:MGI:1289222]
A530084C06Rik	ENSMUSG00000090863	136.13	0.352311	2.8384	0.000223105	RIKEN cDNA A530084C06 gene [Source:MGI Symbol;Acc:MGI:3704402]
Gpc6	ENSMUSG00000058571	108.981	0.352964	2.83315	5.54e-06	glypican 6 [Source:MGI Symbol;Acc:MGI:1346322]
Phlpp1	ENSMUSG00000044340	1103.12	0.353417	2.82952	4.66e-27	PH domain and leucine rich repeat protein phosphatase 1 [Source:MGI Symbol;Acc:MGI:2138327]
Cpm	ENSMUSG00000020183	3062.17	0.353512	2.82876	2.45e-21	carboxypeptidase M [Source:MGI Symbol;Acc:MGI:1917824]
Foxq1	ENSMUSG00000038415	278.644	0.354279	2.82263	2.36e-06	forkhead box Q1 [Source:MGI Symbol;Acc:MGI:1298228]
Fbxo44	ENSMUSG00000029001	260.196	0.354419	2.82152	2.29e-08	F-box protein 44 [Source:MGI Symbol;Acc:MGI:1354744]
Wdfy2	ENSMUSG00000014547	217.384	0.35458	2.82024	4.34e-06	WD repeat and FYVE domain containing 2 [Source:MGI Symbol;Acc:MGI:2442811]
1810043G02Rik	ENSMUSG00000020284	676.063	0.354842	2.81815	2.69e-29	RIKEN cDNA 1810043G02 gene [Source:MGI Symbol;Acc:MGI:1915134]
Rab15	ENSMUSG00000021062	3074.83	0.354866	2.81796	7e-47	RAB15, member RAS oncogene family [Source:MGI Symbol;Acc:MGI:1916865]
Faxc	ENSMUSG00000028246	69.6132	0.3556	2.81215	0.000650223	failed axon connections homolog [Source:MGI Symbol;Acc:MGI:1923382]
Ptprz1	ENSMUSG00000068748	703.953	0.356161	2.80772	7.06e-23	protein tyrosine phosphatase, receptor type Z, polypeptide 1 [Source:MGI Symbol;Acc:MGI:97816]
St3gal4	ENSMUSG00000032038	682.956	0.359142	2.78442	3.27e-20	ST3 beta-galactoside alpha-2,3-sialyltransferase 4 [Source:MGI Symbol;Acc:MGI:1316743]
Elf5	ENSMUSG00000027186	59.9651	0.362161	2.7612	0.000193683	E74-like factor 5 [Source:MGI Symbol;Acc:MGI:1335079]
Pde1c	ENSMUSG00000004347	156.049	0.362767	2.75659	4.17e-10	phosphodiesterase 1C [Source:MGI Symbol;Acc:MGI:108413]
Postn	ENSMUSG00000027750	1026.01	0.363091	2.75413	1.57e-21	periostin, osteoblast specific factor [Source:MGI Symbol;Acc:MGI:1926321]
1190005I06Rik	ENSMUSG00000043687	65.3351	0.36465	2.74236	0.000374403	RIKEN cDNA 1190005I06 gene [Source:MGI Symbol;Acc:MGI:1916168]
Pik3ap1	ENSMUSG00000025017	51.56	0.365926	2.73279	0.00893533	phosphoinositide-3-kinase adaptor protein 1 [Source:MGI Symbol;Acc:MGI:1933177]
Hap1	ENSMUSG00000006930	71.1508	0.372223	2.68656	6.56e-05	huntingtin-associated protein 1 [Source:MGI Symbol;Acc:MGI:1261831]
Dnajc9	ENSMUSG00000021811	2820.14	0.37228	2.68615	1.29e-40	DnaJ heat shock protein family (Hsp40) member C9 [Source:MGI Symbol;Acc:MGI:1915326]
Ica1	ENSMUSG00000062995	95.6592	0.374205	2.67233	0.00196129	islet cell autoantigen 1 [Source:MGI Symbol;Acc:MGI:96391]
Arhgap26	ENSMUSG00000036452	190.189	0.374968	2.66689	9.47e-08	Rho GTPase activating protein 26 [Source:MGI Symbol;Acc:MGI:1918552]
Nme7	ENSMUSG00000026575	2498.62	0.375375	2.664	1.1e-47	NME/NM23 family member 7 [Source:MGI Symbol;Acc:MGI:2449121]
Fndc4	ENSMUSG00000038552	169.052	0.377637	2.64805	1.12e-06	fibronectin type III domain containing 4 [Source:MGI Symbol;Acc:MGI:1917195]
Il17re	ENSMUSG00000043088	1462.65	0.37857	2.64152	3.03e-34	interleukin 17 receptor E [Source:MGI Symbol;Acc:MGI:1889371]
AL670603.1	ENSMUSG00000111410	156.396	0.37983	2.63276	1.69e-05
Ano1	ENSMUSG00000031075	2780.57	0.383416	2.60813	1.3e-19	anoctamin 1, calcium activated chloride channel [Source:MGI Symbol;Acc:MGI:2142149]
Csdc2	ENSMUSG00000042109	132.361	0.384526	2.60061	5.4e-05	cold shock domain containing C2, RNA binding [Source:MGI Symbol;Acc:MGI:2146027]
Pfkp	ENSMUSG00000021196	14078.4	0.388379	2.57481	2.9e-40	phosphofructokinase, platelet [Source:MGI Symbol;Acc:MGI:1891833]
Aspa	ENSMUSG00000020774	115.703	0.389605	2.5667	1.48e-06	aspartoacylase [Source:MGI Symbol;Acc:MGI:87914]
Tnfaip2	ENSMUSG00000021281	1079.31	0.390306	2.5621	5.52e-20	tumor necrosis factor, alpha-induced protein 2 [Source:MGI Symbol;Acc:MGI:104960]
S100a7a	ENSMUSG00000063767	308.59	0.394435	2.53527	1.08e-07	S100 calcium binding protein A7A [Source:MGI Symbol;Acc:MGI:2687194]
D630045J12Rik	ENSMUSG00000063455	1168.5	0.39694	2.51927	2.91e-31	RIKEN cDNA D630045J12 gene [Source:MGI Symbol;Acc:MGI:2669829]
Lrrc15	ENSMUSG00000052316	91.1728	0.398369	2.51024	0.00180314	leucine rich repeat containing 15 [Source:MGI Symbol;Acc:MGI:1921738]
Ptprk	ENSMUSG00000019889	754.755	0.398974	2.50643	1.57e-18	protein tyrosine phosphatase, receptor type, K [Source:MGI Symbol;Acc:MGI:103310]
Nav2	ENSMUSG00000052512	597.902	0.400102	2.49936	1.53e-22	neuron navigator 2 [Source:MGI Symbol;Acc:MGI:2183691]
Usp43	ENSMUSG00000020905	211.879	0.400621	2.49612	4.14e-05	ubiquitin specific peptidase 43 [Source:MGI Symbol;Acc:MGI:2444541]
Spata13	ENSMUSG00000021990	296.642	0.402405	2.48506	4.49e-09	spermatogenesis associated 13 [Source:MGI Symbol;Acc:MGI:104838]
Zfp618	ENSMUSG00000028358	148.26	0.402676	2.48338	7.53e-06	zinc finger protein 618 [Source:MGI Symbol;Acc:MGI:1919950]
Tmc4	ENSMUSG00000019734	440.504	0.40473	2.47078	1.5e-13	transmembrane channel-like gene family 4 [Source:MGI Symbol;Acc:MGI:2669035]
Acta2	ENSMUSG00000035783	8203.09	0.408139	2.45014	7.1e-21	actin, alpha 2, smooth muscle, aorta [Source:MGI Symbol;Acc:MGI:87909]
Adgrg2	ENSMUSG00000031298	626.935	0.408293	2.44922	5.78e-20	adhesion G protein-coupled receptor G2 [Source:MGI Symbol;Acc:MGI:2446854]
Epcam	ENSMUSG00000045394	1882.86	0.408669	2.44697	3.33e-20	epithelial cell adhesion molecule [Source:MGI Symbol;Acc:MGI:106653]
Shroom2	ENSMUSG00000045180	324.394	0.411449	2.43044	3.65e-06	shroom family member 2 [Source:MGI Symbol;Acc:MGI:107194]
Cpne7	ENSMUSG00000034796	52.2869	0.411695	2.42898	0.00661341	copine VII [Source:MGI Symbol;Acc:MGI:2142747]
Sult5a1	ENSMUSG00000000739	126.302	0.411737	2.42873	8.27e-07	sulfotransferase family 5A, member 1 [Source:MGI Symbol;Acc:MGI:1931463]
Gabbr1	ENSMUSG00000024462	755.065	0.413757	2.41688	4.16e-15	gamma-aminobutyric acid (GABA) B receptor, 1 [Source:MGI Symbol;Acc:MGI:1860139]
Socs2	ENSMUSG00000020027	388.854	0.414275	2.41386	2.03e-11	suppressor of cytokine signaling 2 [Source:MGI Symbol;Acc:MGI:1201787]
Nt5e	ENSMUSG00000032420	373.955	0.41474	2.41115	4.67e-08	5' nucleotidase, ecto [Source:MGI Symbol;Acc:MGI:99782]
Tle2	ENSMUSG00000034771	574.474	0.417758	2.39373	3.97e-13	transducin-like enhancer of split 2 [Source:MGI Symbol;Acc:MGI:104635]
Vegfc	ENSMUSG00000031520	64.5301	0.418388	2.39012	0.00322642	vascular endothelial growth factor C [Source:MGI Symbol;Acc:MGI:109124]
Fgf1	ENSMUSG00000036585	893.096	0.420591	2.37761	4.93e-12	fibroblast growth factor 1 [Source:MGI Symbol;Acc:MGI:95515]
Tnfsf10	ENSMUSG00000039304	93.1462	0.420939	2.37564	0.00188388	tumor necrosis factor (ligand) superfamily, member 10 [Source:MGI Symbol;Acc:MGI:107414]
Fgfr1	ENSMUSG00000031565	5877.83	0.421107	2.37469	5.53e-18	fibroblast growth factor receptor 1 [Source:MGI Symbol;Acc:MGI:95522]
Slc37a1	ENSMUSG00000024036	111.298	0.423115	2.36342	0.00362243	solute carrier family 37 (glycerol-3-phosphate transporter), member 1 [Source:MGI Symbol;Acc:MGI:2446181]
Mme	ENSMUSG00000027820	96.6427	0.423406	2.3618	8.05e-05	membrane metallo endopeptidase [Source:MGI Symbol;Acc:MGI:97004]
B4galt6	ENSMUSG00000056124	147.917	0.424517	2.35562	3.73e-05	UDP-Gal:betaGlcNAc beta 1,4-galactosyltransferase, polypeptide 6 [Source:MGI Symbol;Acc:MGI:1928380]
B4galt4	ENSMUSG00000022793	98.6916	0.427583	2.33873	4e-05	UDP-Gal:betaGlcNAc beta 1,4-galactosyltransferase, polypeptide 4 [Source:MGI Symbol;Acc:MGI:1928387]
Asic1	ENSMUSG00000023017	262.662	0.430782	2.32136	1.9e-08	acid-sensing (proton-gated) ion channel 1 [Source:MGI Symbol;Acc:MGI:1194915]
Camk2n1	ENSMUSG00000046447	620.812	0.433244	2.30817	1.45e-17	calcium/calmodulin-dependent protein kinase II inhibitor 1 [Source:MGI Symbol;Acc:MGI:1913509]
Prss23	ENSMUSG00000039405	634.561	0.434281	2.30266	2.49e-15	protease, serine 23 [Source:MGI Symbol;Acc:MGI:1923703]
Tiam2	ENSMUSG00000023800	437.908	0.435046	2.29861	8.17e-11	T cell lymphoma invasion and metastasis 2 [Source:MGI Symbol;Acc:MGI:1344338]
Plce1	ENSMUSG00000024998	236.551	0.435137	2.29812	4.84e-09	phospholipase C, epsilon 1 [Source:MGI Symbol;Acc:MGI:1921305]
Tm4sf1	ENSMUSG00000027800	547.264	0.438464	2.28069	5.06e-17	transmembrane 4 superfamily member 1 [Source:MGI Symbol;Acc:MGI:104678]
Elmo1	ENSMUSG00000041112	337.751	0.44534	2.24548	6.07e-09	engulfment and cell motility 1 [Source:MGI Symbol;Acc:MGI:2153044]
Hivep3	ENSMUSG00000028634	368.172	0.446356	2.24036	3.5e-06	human immunodeficiency virus type I enhancer binding protein 3 [Source:MGI Symbol;Acc:MGI:106589]
Cald1	ENSMUSG00000029761	1779.14	0.446428	2.24	2e-12	caldesmon 1 [Source:MGI Symbol;Acc:MGI:88250]
Fa2h	ENSMUSG00000033579	268.504	0.448849	2.22792	0.00358239	fatty acid 2-hydroxylase [Source:MGI Symbol;Acc:MGI:2443327]
Fzd7	ENSMUSG00000041075	1196.5	0.449146	2.22645	5.68e-26	frizzled class receptor 7 [Source:MGI Symbol;Acc:MGI:108570]
Sec14l1	ENSMUSG00000020823	7199.44	0.44931	2.22564	5.93e-18	SEC14-like lipid binding 1 [Source:MGI Symbol;Acc:MGI:1921386]
Hif1a	ENSMUSG00000021109	5330.99	0.449481	2.22479	8.03e-33	hypoxia inducible factor 1, alpha subunit [Source:MGI Symbol;Acc:MGI:106918]
Rab11fip4	ENSMUSG00000017639	1017.35	0.450811	2.21822	3.25e-17	RAB11 family interacting protein 4 (class II) [Source:MGI Symbol;Acc:MGI:2442920]
Atp1a1	ENSMUSG00000033161	52445.5	0.4514	2.21533	1.85e-34	ATPase, Na+/K+ transporting, alpha 1 polypeptide [Source:MGI Symbol;Acc:MGI:88105]
Ehf	ENSMUSG00000012350	3954.5	0.453198	2.20654	2.44e-20	ets homologous factor [Source:MGI Symbol;Acc:MGI:1270840]
Magi3	ENSMUSG00000052539	1109.7	0.455681	2.19452	4.3e-11	membrane associated guanylate kinase, WW and PDZ domain containing 3 [Source:MGI Symbol;Acc:MGI:1923484]
Mcf2l	ENSMUSG00000031442	255.694	0.456198	2.19203	2.47e-06	mcf.2 transforming sequence-like [Source:MGI Symbol;Acc:MGI:103263]
Sowahb	ENSMUSG00000045314	111.227	0.456533	2.19042	8.89e-05	sosondowah ankyrin repeat domain family member B [Source:MGI Symbol;Acc:MGI:1925338]
Enpp3	ENSMUSG00000019989	168.155	0.459286	2.17729	1.59e-05	ectonucleotide pyrophosphatase/phosphodiesterase 3 [Source:MGI Symbol;Acc:MGI:2143702]
Atp6v0a4	ENSMUSG00000038600	5112.36	0.462685	2.1613	2.62e-27	ATPase, H+ transporting, lysosomal V0 subunit A4 [Source:MGI Symbol;Acc:MGI:2153480]
Tmem176a	ENSMUSG00000023367	778.685	0.465524	2.14812	3e-13	transmembrane protein 176A [Source:MGI Symbol;Acc:MGI:1913308]
Slc45a3	ENSMUSG00000026435	154.452	0.466543	2.14342	3.12e-06	solute carrier family 45, member 3 [Source:MGI Symbol;Acc:MGI:1922082]
AC124712.1	ENSMUSG00000114046	359.273	0.467809	2.13763	9.1e-11
Arhgef28	ENSMUSG00000021662	855.754	0.471178	2.12234	1.51e-17	Rho guanine nucleotide exchange factor (GEF) 28 [Source:MGI Symbol;Acc:MGI:1346016]
Rasl12	ENSMUSG00000041696	293.491	0.471472	2.12102	3.62e-08	RAS-like, family 12 [Source:MGI Symbol;Acc:MGI:1918034]
Lmod1	ENSMUSG00000048096	469.538	0.475253	2.10414	3.23e-06	leiomodin 1 (smooth muscle) [Source:MGI Symbol;Acc:MGI:2135671]
Hs3st3b1	ENSMUSG00000070407	674.245	0.475493	2.10308	2.1e-15	heparan sulfate (glucosamine) 3-O-sulfotransferase 3B1 [Source:MGI Symbol;Acc:MGI:1333853]
Deptor	ENSMUSG00000022419	1588.2	0.47619	2.1	8.34e-18	DEP domain containing MTOR-interacting protein [Source:MGI Symbol;Acc:MGI:2146322]
Prickle1	ENSMUSG00000036158	209.525	0.477279	2.09521	5.83e-07	prickle planar cell polarity protein 1 [Source:MGI Symbol;Acc:MGI:1916034]
Rap1gap	ENSMUSG00000041351	923.13	0.478889	2.08817	2.43e-20	Rap1 GTPase-activating protein [Source:MGI Symbol;Acc:MGI:109338]
Zfp462	ENSMUSG00000060206	279.152	0.480145	2.0827	1.54e-06	zinc finger protein 462 [Source:MGI Symbol;Acc:MGI:107690]
Dennd3	ENSMUSG00000036661	111.595	0.480562	2.0809	0.000620869	DENN/MADD domain containing 3 [Source:MGI Symbol;Acc:MGI:2146009]
Fam20a	ENSMUSG00000020614	357.961	0.481211	2.07809	1.59e-07	family with sequence similarity 20, member A [Source:MGI Symbol;Acc:MGI:2388266]
Pmm1	ENSMUSG00000022474	2688.35	0.481602	2.0764	1.04e-16	phosphomannomutase 1 [Source:MGI Symbol;Acc:MGI:1353418]
Kcnk1	ENSMUSG00000033998	500.201	0.481845	2.07535	2.19e-13	potassium channel, subfamily K, member 1 [Source:MGI Symbol;Acc:MGI:109322]
Car6	ENSMUSG00000028972	2223.55	0.484429	2.06429	6.5e-16	carbonic anhydrase 6 [Source:MGI Symbol;Acc:MGI:1333786]
Rab20	ENSMUSG00000031504	117.39	0.484585	2.06362	0.00170125	RAB20, member RAS oncogene family [Source:MGI Symbol;Acc:MGI:102789]
Epb41l1	ENSMUSG00000027624	566.235	0.484712	2.06308	7.46e-09	erythrocyte membrane protein band 4.1 like 1 [Source:MGI Symbol;Acc:MGI:103010]
Mal	ENSMUSG00000027375	819.193	0.485719	2.0588	2.93e-13	myelin and lymphocyte protein, T cell differentiation protein [Source:MGI Symbol;Acc:MGI:892970]
Ctgf	ENSMUSG00000019997	1501.51	0.487027	2.05327	2.97e-07	connective tissue growth factor [Source:MGI Symbol;Acc:MGI:95537]
Noxo1	ENSMUSG00000019320	146.478	0.487395	2.05173	0.000750448	NADPH oxidase organizer 1 [Source:MGI Symbol;Acc:MGI:1919143]
Lurap1	ENSMUSG00000028701	357.586	0.487699	2.05044	6.16e-06	leucine rich adaptor protein 1 [Source:MGI Symbol;Acc:MGI:1915325]
Parm1	ENSMUSG00000034981	544.907	0.489803	2.04164	1.38e-10	prostate androgen-regulated mucin-like protein 1 [Source:MGI Symbol;Acc:MGI:2443349]
Ccdc88a	ENSMUSG00000032740	94.3081	0.491061	2.03641	0.00215107	coiled coil domain containing 88A [Source:MGI Symbol;Acc:MGI:1925177]
Tusc5	ENSMUSG00000046275	167.917	0.492392	2.0309	6.13e-05	tumor suppressor candidate 5 [Source:MGI Symbol;Acc:MGI:3029307]
Pdzrn3	ENSMUSG00000035357	546.897	0.495667	2.01748	7.41e-06	PDZ domain containing RING finger 3 [Source:MGI Symbol;Acc:MGI:1933157]
Slc25a23	ENSMUSG00000046329	647.511	0.496108	2.01569	1.2e-08	solute carrier family 25 (mitochondrial carrier; phosphate carrier), member 23 [Source:MGI Symbol;Acc:MGI:1914222]
	BaseMean>30; FC>2; padj<0.01; protein_coding

## Sheet: Genes Up in Tabby
Gene_Name	Gene_ID	baseMean	FC (Ta/WT)	FC (WT/Ta)	padj	Description
Htra4	ENSMUSG00000037406	51.6535	12.7566	0.0783908	1.38e-06	HtrA serine peptidase 4 [Source:MGI Symbol;Acc:MGI:3036260]
Clec3a	ENSMUSG00000008874	35.8926	10.5142	0.0951097	8.26e-08	C-type lectin domain family 3, member a [Source:MGI Symbol;Acc:MGI:2685642]
Cilp2	ENSMUSG00000044006	178.906	7.84768	0.127426	1.01e-18	cartilage intermediate layer protein 2 [Source:MGI Symbol;Acc:MGI:1915959]
Coch	ENSMUSG00000020953	639.076	6.34704	0.157554	0.000130349	cochlin [Source:MGI Symbol;Acc:MGI:1278313]
Chad	ENSMUSG00000039084	603.758	6.23035	0.160505	1.31e-05	chondroadherin [Source:MGI Symbol;Acc:MGI:1096866]
Prg4	ENSMUSG00000006014	3618.91	5.56596	0.179664	0.00548602	proteoglycan 4 (megakaryocyte stimulating factor, articular superficial zone protein) [Source:MGI Symbol;Acc:MGI:1891344]
Scube2	ENSMUSG00000007279	38.1463	3.70839	0.269659	0.00222685	signal peptide, CUB domain, EGF-like 2 [Source:MGI Symbol;Acc:MGI:1928765]
Gm590	ENSMUSG00000096393	60.2042	3.68005	0.271735	1.18e-05	predicted gene 590 [Source:MGI Symbol;Acc:MGI:2685436]
Klk1b26	ENSMUSG00000053719	59.468	3.57576	0.279661	0.00185302	kallikrein 1-related petidase b26 [Source:MGI Symbol;Acc:MGI:891981]
Ccl22	ENSMUSG00000031779	34.7756	3.48718	0.286764	0.000366488	chemokine (C-C motif) ligand 22 [Source:MGI Symbol;Acc:MGI:1306779]
Myh3	ENSMUSG00000020908	203.744	3.41403	0.292909	3.28e-10	myosin, heavy polypeptide 3, skeletal muscle, embryonic [Source:MGI Symbol;Acc:MGI:1339709]
Mettl21e	ENSMUSG00000046828	82.2164	3.40432	0.293745	0.000300679	methyltransferase like 21E [Source:MGI Symbol;Acc:MGI:2685837]
Ostn	ENSMUSG00000052276	62.5233	3.30551	0.302525	0.00015474	osteocrin [Source:MGI Symbol;Acc:MGI:2677164]
Zic4	ENSMUSG00000036972	35.5835	3.21594	0.310951	0.00675886	zinc finger protein of the cerebellum 4 [Source:MGI Symbol;Acc:MGI:107201]
Myh2	ENSMUSG00000033196	41470.1	2.8768	0.347608	0.000259221	myosin, heavy polypeptide 2, skeletal muscle, adult [Source:MGI Symbol;Acc:MGI:1339710]
Thbs4	ENSMUSG00000021702	1807.72	2.86959	0.348481	3.32e-16	thrombospondin 4 [Source:MGI Symbol;Acc:MGI:1101779]
Comp	ENSMUSG00000031849	1662.08	2.83987	0.352129	0.00919711	cartilage oligomeric matrix protein [Source:MGI Symbol;Acc:MGI:88469]
Atf3	ENSMUSG00000026628	900.841	2.7677	0.36131	9.7e-21	activating transcription factor 3 [Source:MGI Symbol;Acc:MGI:109384]
Ppp1r1a	ENSMUSG00000022490	116.324	2.7482	0.363874	0.000569887	protein phosphatase 1, regulatory (inhibitor) subunit 1A [Source:MGI Symbol;Acc:MGI:1889595]
Myoz2	ENSMUSG00000028116	1514.03	2.70717	0.369389	2.24e-15	myozenin 2 [Source:MGI Symbol;Acc:MGI:1913063]
Myl3	ENSMUSG00000059741	321.288	2.69043	0.371688	5.12e-06	myosin, light polypeptide 3 [Source:MGI Symbol;Acc:MGI:97268]
Col9a1	ENSMUSG00000026147	154.893	2.62838	0.380462	1.32e-07	collagen, type IX, alpha 1 [Source:MGI Symbol;Acc:MGI:88465]
Lingo3	ENSMUSG00000051067	98.2411	2.60835	0.383383	0.000161777	leucine rich repeat and Ig domain containing 3 [Source:MGI Symbol;Acc:MGI:3609246]
1190003K10Rik	ENSMUSG00000096537	72.5808	2.59795	0.384918	0.00442155	RIKEN cDNA 1190003K10 gene [Source:MGI Symbol;Acc:MGI:1916130]
Gm867	ENSMUSG00000050157	60.4725	2.59201	0.3858	0.00150916	predicted gene 867 [Source:MGI Symbol;Acc:MGI:2685713]
Tceal7	ENSMUSG00000079428	53.1657	2.57765	0.38795	0.00408086	transcription elongation factor A (SII)-like 7 [Source:MGI Symbol;Acc:MGI:1915746]
Myl6b	ENSMUSG00000039824	4785.9	2.52957	0.395323	4.75e-22	myosin, light polypeptide 6B [Source:MGI Symbol;Acc:MGI:1917789]
Atp1b4	ENSMUSG00000016327	79.6686	2.50054	0.399914	0.000641146	ATPase, (Na+)/K+ transporting, beta 4 polypeptide [Source:MGI Symbol;Acc:MGI:1915071]
Myl10	ENSMUSG00000005474	395.641	2.44931	0.408278	1.67e-09	myosin, light chain 10, regulatory [Source:MGI Symbol;Acc:MGI:1891705]
Tnnc1	ENSMUSG00000091898	1597.72	2.44792	0.408511	6.97e-15	troponin C, cardiac/slow skeletal [Source:MGI Symbol;Acc:MGI:98779]
Col22a1	ENSMUSG00000079022	416.003	2.42938	0.411627	1.83e-06	collagen, type XXII, alpha 1 [Source:MGI Symbol;Acc:MGI:1916950]
Ptx3	ENSMUSG00000027832	78.697	2.42237	0.41282	0.000214522	pentraxin related gene [Source:MGI Symbol;Acc:MGI:104641]
Bex1	ENSMUSG00000050071	55.3737	2.39959	0.416737	0.00466993	brain expressed X-linked 1 [Source:MGI Symbol;Acc:MGI:1328321]
Ces1f	ENSMUSG00000031725	102.924	2.39527	0.417489	0.000191016	carboxylesterase 1F [Source:MGI Symbol;Acc:MGI:2142687]
Tnni1	ENSMUSG00000026418	2224.61	2.34808	0.42588	2.53e-21	troponin I, skeletal, slow 1 [Source:MGI Symbol;Acc:MGI:105073]
Spp1	ENSMUSG00000029304	385.965	2.3028	0.434253	4.17e-07	secreted phosphoprotein 1 [Source:MGI Symbol;Acc:MGI:98389]
Tceal5	ENSMUSG00000054034	110.73	2.25383	0.44369	0.00111543	transcription elongation factor A (SII)-like 5 [Source:MGI Symbol;Acc:MGI:3036236]
Atcay	ENSMUSG00000034958	633.629	2.24784	0.444872	3.49e-09	ataxia, cerebellar, Cayman type [Source:MGI Symbol;Acc:MGI:2448730]
Lrrc2	ENSMUSG00000032495	483.974	2.24672	0.445093	3.32e-05	leucine rich repeat containing 2 [Source:MGI Symbol;Acc:MGI:1921499]
Uchl1	ENSMUSG00000029223	276.67	2.24198	0.446034	4.3e-07	ubiquitin carboxy-terminal hydrolase L1 [Source:MGI Symbol;Acc:MGI:103149]
Myh6	ENSMUSG00000040752	459.447	2.2287	0.448693	0.000116405	myosin, heavy polypeptide 6, cardiac muscle, alpha [Source:MGI Symbol;Acc:MGI:97255]
Dusp26	ENSMUSG00000039661	381.632	2.22345	0.449751	0.000218955	dual specificity phosphatase 26 (putative) [Source:MGI Symbol;Acc:MGI:1914209]
Mylk2	ENSMUSG00000027470	1494.55	2.17754	0.459233	2.49e-12	myosin, light polypeptide kinase 2, skeletal muscle [Source:MGI Symbol;Acc:MGI:2139434]
Myh13	ENSMUSG00000060180	855.628	2.15032	0.465047	7.63e-07	myosin, heavy polypeptide 13, skeletal muscle [Source:MGI Symbol;Acc:MGI:1339967]
Acta1	ENSMUSG00000031972	103478	2.14959	0.465205	4.68e-16	actin, alpha 1, skeletal muscle [Source:MGI Symbol;Acc:MGI:87902]
Actn2	ENSMUSG00000052374	13171.9	2.14611	0.46596	1.52e-09	actinin alpha 2 [Source:MGI Symbol;Acc:MGI:109192]
Tigd4	ENSMUSG00000047819	232.612	2.13671	0.468009	1.21e-05	tigger transposable element derived 4 [Source:MGI Symbol;Acc:MGI:2685264]
Tmem233	ENSMUSG00000079278	248.146	2.12883	0.469742	5.92e-06	transmembrane protein 233 [Source:MGI Symbol;Acc:MGI:3651514]
Myh8	ENSMUSG00000055775	2535.11	2.12447	0.470705	1.17e-13	myosin, heavy polypeptide 8, skeletal muscle, perinatal [Source:MGI Symbol;Acc:MGI:1339712]
Car3	ENSMUSG00000027559	18444.2	2.12361	0.470896	3.1e-16	carbonic anhydrase 3 [Source:MGI Symbol;Acc:MGI:88270]
Klhl31	ENSMUSG00000044938	1460.05	2.11792	0.472161	3.3e-12	kelch-like 31 [Source:MGI Symbol;Acc:MGI:3045305]
Neurl1a	ENSMUSG00000006435	984.096	2.1013	0.475896	1.16e-10	neuralized E3 ubiquitin protein ligase 1A [Source:MGI Symbol;Acc:MGI:1334263]
Pvalb	ENSMUSG00000005716	8445.29	2.09688	0.476899	2.51e-08	parvalbumin [Source:MGI Symbol;Acc:MGI:97821]
Slc16a3	ENSMUSG00000025161	1110.58	2.09413	0.477526	1.07e-09	solute carrier family 16 (monocarboxylic acid transporters), member 3 [Source:MGI Symbol;Acc:MGI:1933438]
Casq1	ENSMUSG00000007122	6526.11	2.08123	0.480485	2.66e-13	calsequestrin 1 [Source:MGI Symbol;Acc:MGI:1309468]
St8sia5	ENSMUSG00000025425	96.8993	2.07954	0.480875	0.0099202	ST8 alpha-N-acetyl-neuraminide alpha-2,8-sialyltransferase 5 [Source:MGI Symbol;Acc:MGI:109243]
Klhl41	ENSMUSG00000075307	8703.64	2.07409	0.48214	4.47e-10	kelch-like 41 [Source:MGI Symbol;Acc:MGI:2683854]
Smtnl1	ENSMUSG00000027077	4038.53	2.07372	0.482224	3.64e-12	smoothelin-like 1 [Source:MGI Symbol;Acc:MGI:1915928]
Klhl40	ENSMUSG00000074001	968.122	2.06646	0.48392	1.58e-06	kelch-like 40 [Source:MGI Symbol;Acc:MGI:1919580]
Eef1a2	ENSMUSG00000016349	5930.5	2.0662	0.483981	2.34e-11	eukaryotic translation elongation factor 1 alpha 2 [Source:MGI Symbol;Acc:MGI:1096317]
Chrna1	ENSMUSG00000027107	964.975	2.06489	0.484288	3.62e-11	cholinergic receptor, nicotinic, alpha polypeptide 1 (muscle) [Source:MGI Symbol;Acc:MGI:87885]
Dusp10	ENSMUSG00000039384	771.608	2.06459	0.484357	1.46e-08	dual specificity phosphatase 10 [Source:MGI Symbol;Acc:MGI:1927070]
Art5	ENSMUSG00000070424	598.003	2.06435	0.484414	3.96e-08	ADP-ribosyltransferase 5 [Source:MGI Symbol;Acc:MGI:107948]
Myh7b	ENSMUSG00000074652	495.018	2.05841	0.485811	0.000189658	myosin, heavy chain 7B, cardiac muscle, beta [Source:MGI Symbol;Acc:MGI:3710243]
Asb12	ENSMUSG00000031204	131.028	2.0403	0.490123	0.00130399	ankyrin repeat and SOCS box-containing 12 [Source:MGI Symbol;Acc:MGI:1917642]
Mlf1	ENSMUSG00000048416	739.848	2.03974	0.490258	8.54e-06	myeloid leukemia factor 1 [Source:MGI Symbol;Acc:MGI:1341819]
Myl1	ENSMUSG00000061816	43345.6	2.03923	0.490382	4.74e-11	myosin, light polypeptide 1 [Source:MGI Symbol;Acc:MGI:97269]
Cav3	ENSMUSG00000062694	675.565	2.02927	0.492787	5.58e-08	caveolin 3 [Source:MGI Symbol;Acc:MGI:107570]
Atp2a1	ENSMUSG00000030730	105288	2.02722	0.493286	1.42e-15	ATPase, Ca++ transporting, cardiac muscle, fast twitch 1 [Source:MGI Symbol;Acc:MGI:105058]
Tnnt1	ENSMUSG00000064179	6561.72	2.02305	0.494304	1.28e-17	troponin T1, skeletal, slow [Source:MGI Symbol;Acc:MGI:1333868]
Lrrn1	ENSMUSG00000034648	671.809	2.01776	0.495598	3.83e-09	leucine rich repeat protein 1, neuronal [Source:MGI Symbol;Acc:MGI:106038]
Ip6k3	ENSMUSG00000024210	327.32	2.0089	0.497785	6.97e-06	inositol hexaphosphate kinase 3 [Source:MGI Symbol;Acc:MGI:3045325]
	BaseMean>30; FC>2; padj<0.01; protein_coding

## Sheet: "SWG-Enriched" mRNAs
Gene_Name	Gene_ID	baseMean	FC (Ta/WT)	FC (WT/Ta)	padj	Description
Atp6v1b1	ENSMUSG00000006269	5615.65	3.39155e-05	29485.1	7.04e-34	ATPase, H+ transporting, lysosomal V1 subunit B1 [Source:MGI Symbol;Acc:MGI:103285]
Foxi1	ENSMUSG00000047861	734.835	0.000133067	7515.01	4.19e-25	forkhead box I1 [Source:MGI Symbol;Acc:MGI:1096329]
Tmem213	ENSMUSG00000029829	271.278	0.000360358	2775.02	9.59e-20	transmembrane protein 213 [Source:MGI Symbol;Acc:MGI:1924772]
Oit1	ENSMUSG00000021749	104.838	0.000932241	1072.68	6.6e-15	oncoprotein induced transcript 1 [Source:MGI Symbol;Acc:MGI:1201784]
Wdr72	ENSMUSG00000044976	167.696	0.00113673	879.718	3.04e-14	WD repeat domain 72 [Source:MGI Symbol;Acc:MGI:3583957]
Slc26a4	ENSMUSG00000020651	167.591	0.00113781	878.881	2.71e-14	solute carrier family 26, member 4 [Source:MGI Symbol;Acc:MGI:1346029]
Cxcl17	ENSMUSG00000060188	69.6631	0.0014029	712.807	4.89e-13	chemokine (C-X-C motif) ligand 17 [Source:MGI Symbol;Acc:MGI:2387642]
Dynap	ENSMUSG00000024512	126.766	0.00150436	664.735	4.43e-13	dynactin associated protein [Source:MGI Symbol;Acc:MGI:1922827]
Krt79	ENSMUSG00000061397	5824.44	0.00152101	657.459	6.05e-250	keratin 79 [Source:MGI Symbol;Acc:MGI:2385030]
Chst9	ENSMUSG00000047161	59.3381	0.00164698	607.172	5.12e-12	carbohydrate (N-acetylgalactosamine 4-0) sulfotransferase 9 [Source:MGI Symbol;Acc:MGI:1918617]
Vtcn1	ENSMUSG00000051076	54.6957	0.00178791	559.312	5.15e-12	V-set domain containing T cell activation inhibitor 1 [Source:MGI Symbol;Acc:MGI:3039619]
Foxa1	ENSMUSG00000035451	49.2582	0.00198529	503.706	1.72e-11	forkhead box A1 [Source:MGI Symbol;Acc:MGI:1347472]
Clic6	ENSMUSG00000022949	1450.23	0.00231125	432.665	6.75e-130	chloride intracellular channel 6 [Source:MGI Symbol;Acc:MGI:2146607]
Rhcg	ENSMUSG00000030549	180.926	0.00292821	341.505	3.75e-20	Rhesus blood group-associated C glycoprotein [Source:MGI Symbol;Acc:MGI:1888517]
Klk1	ENSMUSG00000063903	279.263	0.00335602	297.972	0.000178629	kallikrein 1 [Source:MGI Symbol;Acc:MGI:102850]
Lrrc26	ENSMUSG00000026961	345.892	0.00358502	278.939	1.94e-44	leucine rich repeat containing 26 [Source:MGI Symbol;Acc:MGI:2385129]
5430419D17Rik	ENSMUSG00000006204	336.078	0.00473862	211.032	1.16e-46	RIKEN cDNA 5430419D17 gene [Source:MGI Symbol;Acc:MGI:1918645]
Sidt1	ENSMUSG00000022696	481.37	0.00479397	208.596	6.9e-70	SID1 transmembrane family, member 1 [Source:MGI Symbol;Acc:MGI:2443155]
Slain1	ENSMUSG00000055717	37.5864	0.00508882	196.509	3.4e-08	SLAIN motif family, member 1 [Source:MGI Symbol;Acc:MGI:2145578]
Pglyrp1	ENSMUSG00000030413	1811.85	0.00601313	166.303	6.05e-208	peptidoglycan recognition protein 1 [Source:MGI Symbol;Acc:MGI:1345092]
Ppp1r1b	ENSMUSG00000061718	1473.6	0.00648288	154.252	2.32e-30	protein phosphatase 1, regulatory (inhibitor) subunit 1B [Source:MGI Symbol;Acc:MGI:94860]
Cldn7	ENSMUSG00000018569	159.982	0.00667055	149.913	3.06e-28	claudin 7 [Source:MGI Symbol;Acc:MGI:1859285]
Elovl3	ENSMUSG00000038754	44.9655	0.0078195	127.885	8.54e-08	elongation of very long chain fatty acids (FEN1/Elo2, SUR4/Elo3, yeast)-like 3 [Source:MGI Symbol;Acc:MGI:1195976]
Cldn3	ENSMUSG00000070473	384.48	0.00878315	113.854	1.25e-75	claudin 3 [Source:MGI Symbol;Acc:MGI:1329044]
Fbp1	ENSMUSG00000069805	219.209	0.00976396	102.417	3.08e-43	fructose bisphosphatase 1 [Source:MGI Symbol;Acc:MGI:95492]
Slc26a7	ENSMUSG00000040569	48.3001	0.0111442	89.7331	5.58e-11	solute carrier family 26, member 7 [Source:MGI Symbol;Acc:MGI:2384791]
Cyp2b10	ENSMUSG00000030483	179.633	0.0120349	83.0918	1.59e-05	cytochrome P450, family 2, subfamily b, polypeptide 10 [Source:MGI Symbol;Acc:MGI:88598]
Krt18	ENSMUSG00000023043	1209.94	0.0122451	81.6654	3.25e-209	keratin 18 [Source:MGI Symbol;Acc:MGI:96692]
Krt8	ENSMUSG00000049382	1289.22	0.0127688	78.316	6.91e-206	keratin 8 [Source:MGI Symbol;Acc:MGI:96705]
Nxf7	ENSMUSG00000031410	39.995	0.0134998	74.0754	1.52e-09	nuclear RNA export factor 7 [Source:MGI Symbol;Acc:MGI:2159343]
Plekhs1	ENSMUSG00000035818	36.3897	0.0146929	68.0603	2.5e-09	pleckstrin homology domain containing, family S member 1 [Source:MGI Symbol;Acc:MGI:2443041]
Fxyd2	ENSMUSG00000059412	8780.98	0.0161623	61.8723	2.39e-280	FXYD domain-containing ion transport regulator 2 [Source:MGI Symbol;Acc:MGI:1195260]
Bpifb3	ENSMUSG00000068008	179.326	0.0168573	59.3215	4.85e-42	BPI fold containing family B, member 3 [Source:MGI Symbol;Acc:MGI:2675077]
Kcnq1	ENSMUSG00000009545	406.088	0.0182478	54.8011	2.07e-91	potassium voltage-gated channel, subfamily Q, member 1 [Source:MGI Symbol;Acc:MGI:108083]
Atp2a3	ENSMUSG00000020788	15363.6	0.0191254	52.2864	3.25e-307	ATPase, Ca++ transporting, ubiquitous [Source:MGI Symbol;Acc:MGI:1194503]
Adcy8	ENSMUSG00000022376	196.309	0.0221206	45.2068	2.36e-51	adenylate cyclase 8 [Source:MGI Symbol;Acc:MGI:1341110]
Kit	ENSMUSG00000005672	1742.56	0.0224991	44.4462	5.29e-33	KIT proto-oncogene receptor tyrosine kinase [Source:MGI Symbol;Acc:MGI:96677]
Rasef	ENSMUSG00000043003	55.7232	0.022895	43.6776	1.26e-15	RAS and EF hand domain containing [Source:MGI Symbol;Acc:MGI:2448565]
Kcne3	ENSMUSG00000035165	317.95	0.024999	40.0016	2.42e-63	potassium voltage-gated channel, Isk-related subfamily, gene 3 [Source:MGI Symbol;Acc:MGI:1891124]
Gsg1l	ENSMUSG00000046182	47.5899	0.026611	37.5785	6.83e-14	GSG1-like [Source:MGI Symbol;Acc:MGI:2685483]
Ceacam1	ENSMUSG00000074272	1989.49	0.0267228	37.4213	2.22e-233	carcinoembryonic antigen-related cell adhesion molecule 1 [Source:MGI Symbol;Acc:MGI:1347245]
Wfdc2	ENSMUSG00000017723	528.797	0.0267527	37.3794	1.06e-121	WAP four-disulfide core domain 2 [Source:MGI Symbol;Acc:MGI:1914951]
Lcp2	ENSMUSG00000002699	586.517	0.0272918	36.641	1.97e-142	lymphocyte cytosolic protein 2 [Source:MGI Symbol;Acc:MGI:1321402]
Cyp2a5	ENSMUSG00000005547	192.231	0.0273022	36.627	2.6e-54	cytochrome P450, family 2, subfamily a, polypeptide 5 [Source:MGI Symbol;Acc:MGI:88597]
Plekhd1	ENSMUSG00000066438	58.8134	0.027613	36.2148	1.3e-17	pleckstrin homology domain containing, family D (with coiled-coil domains) member 1 [Source:MGI Symbol;Acc:MGI:3036228]
Chrm3	ENSMUSG00000046159	270.137	0.0280974	35.5905	5.13e-16	cholinergic receptor, muscarinic 3, cardiac [Source:MGI Symbol;Acc:MGI:88398]
Ceacam2	ENSMUSG00000054385	478.415	0.0294773	33.9244	2.06e-103	carcinoembryonic antigen-related cell adhesion molecule 2 [Source:MGI Symbol;Acc:MGI:1347246]
Kcnn4	ENSMUSG00000054342	843.975	0.0336061	29.7565	2.03e-108	potassium intermediate/small conductance calcium-activated channel, subfamily N, member 4 [Source:MGI Symbol;Acc:MGI:1277957]
Tfcp2l1	ENSMUSG00000026380	3349.81	0.0353794	28.265	1.79e-300	transcription factor CP2-like 1 [Source:MGI Symbol;Acc:MGI:2444691]
Klhdc7a	ENSMUSG00000078234	606.005	0.0366353	27.2961	2.5e-27	kelch domain containing 7A [Source:MGI Symbol;Acc:MGI:2444612]
Krt19	ENSMUSG00000020911	1354.34	0.0390973	25.5772	2.57e-126	keratin 19 [Source:MGI Symbol;Acc:MGI:96693]
Rab17	ENSMUSG00000026304	149.567	0.0394538	25.3461	5.86e-40	RAB17, member RAS oncogene family [Source:MGI Symbol;Acc:MGI:104640]
Acss1	ENSMUSG00000027452	2074.66	0.0397667	25.1466	2.02e-210	acyl-CoA synthetase short-chain family member 1 [Source:MGI Symbol;Acc:MGI:1915988]
Thbs1	ENSMUSG00000040152	4591.67	0.0401683	24.8952	2.16e-43	thrombospondin 1 [Source:MGI Symbol;Acc:MGI:98737]
Palm2	ENSMUSG00000090053	35.444	0.040555	24.6579	3.98e-10	paralemmin 2 [Source:MGI Symbol;Acc:MGI:1934601]
Kcnmb2	ENSMUSG00000037610	48.4227	0.0423951	23.5876	1.76e-12	potassium large conductance calcium-activated channel, subfamily M, beta member 2 [Source:MGI Symbol;Acc:MGI:1919663]
Slc5a8	ENSMUSG00000020062	133.933	0.043698	22.8843	0.00104085	solute carrier family 5 (iodide transporter), member 8 [Source:MGI Symbol;Acc:MGI:2384916]
Cldn8	ENSMUSG00000050520	591.672	0.0450122	22.2162	1.88e-121	claudin 8 [Source:MGI Symbol;Acc:MGI:1859286]
Mlph	ENSMUSG00000026303	604.441	0.0451914	22.1281	5.79e-84	melanophilin [Source:MGI Symbol;Acc:MGI:2176380]
Shisa7	ENSMUSG00000053550	94.7489	0.046685	21.4202	9.51e-27	shisa family member 7 [Source:MGI Symbol;Acc:MGI:3605641]
Best2	ENSMUSG00000052819	670.926	0.051706	19.3401	3.57e-117	bestrophin 2 [Source:MGI Symbol;Acc:MGI:2387588]
Eif4e1b	ENSMUSG00000074895	38.9042	0.0525694	19.0225	5.09e-12	eukaryotic translation initiation factor 4E family member 1B [Source:MGI Symbol;Acc:MGI:2685119]
Ccdc160	ENSMUSG00000073207	60.6256	0.0561167	17.82	4.23e-15	coiled-coil domain containing 160 [Source:MGI Symbol;Acc:MGI:3588225]
Irx1	ENSMUSG00000060969	92.5298	0.0583353	17.1423	3.14e-24	Iroquois related homeobox 1 (Drosophila) [Source:MGI Symbol;Acc:MGI:1197515]
Ildr1	ENSMUSG00000022900	234.964	0.0583821	17.1285	7.36e-51	immunoglobulin-like domain containing receptor 1 [Source:MGI Symbol;Acc:MGI:2146574]
Adgrl3	ENSMUSG00000037605	93.5008	0.0599528	16.6798	1.13e-25	adhesion G protein-coupled receptor L3 [Source:MGI Symbol;Acc:MGI:2441950]
Slc44a3	ENSMUSG00000039865	191.698	0.0615057	16.2587	4.59e-48	solute carrier family 44, member 3 [Source:MGI Symbol;Acc:MGI:2384860]
Vipr1	ENSMUSG00000032528	1293.71	0.0643647	15.5365	1.69e-158	vasoactive intestinal peptide receptor 1 [Source:MGI Symbol;Acc:MGI:109272]
Smim22	ENSMUSG00000096215	34.7313	0.0646619	15.4651	1.77e-09	small integral membrane protein 22 [Source:MGI Symbol;Acc:MGI:3643379]
Mfsd4a	ENSMUSG00000059149	3197.69	0.065099	15.3612	6.68e-25	major facilitator superfamily domain containing 4A [Source:MGI Symbol;Acc:MGI:2442786]
Rhpn2	ENSMUSG00000030494	286.381	0.067172	14.8872	1.13e-66	rhophilin, Rho GTPase binding protein 2 [Source:MGI Symbol;Acc:MGI:1289234]
Chrm1	ENSMUSG00000032773	275.425	0.0672575	14.8682	2.29e-73	cholinergic receptor, muscarinic 1, CNS [Source:MGI Symbol;Acc:MGI:88396]
Gprc5a	ENSMUSG00000046733	249.918	0.0697023	14.3467	1.85e-43	G protein-coupled receptor, family C, group 5, member A [Source:MGI Symbol;Acc:MGI:1891250]
3110079O15Rik	ENSMUSG00000026258	27.0955	0.0704528	14.1939	3.71e-07	RIKEN cDNA 3110079O15 gene [Source:MGI Symbol;Acc:MGI:1920484]
Ncald	ENSMUSG00000051359	602.131	0.0718989	13.9084	7.21e-119	neurocalcin delta [Source:MGI Symbol;Acc:MGI:1196326]
Map3k21	ENSMUSG00000031853	64.2979	0.0747768	13.3731	8.19e-16	mitogen-activated protein kinase kinase kinase 21 [Source:MGI Symbol;Acc:MGI:2385307]
Chst10	ENSMUSG00000026080	60.6173	0.0758883	13.1773	7.57e-15	carbohydrate sulfotransferase 10 [Source:MGI Symbol;Acc:MGI:2138283]
Stra6	ENSMUSG00000032327	510.524	0.0789864	12.6604	4.09e-79	stimulated by retinoic acid gene 6 [Source:MGI Symbol;Acc:MGI:107742]
Spink12	ENSMUSG00000061144	421.432	0.0805378	12.4165	0.00400915	serine peptidase inhibitor, Kazal type 12 [Source:MGI Symbol;Acc:MGI:1925492]
Plppr4	ENSMUSG00000044667	44.1029	0.0816064	12.2539	1.48e-11	phospholipid phosphatase related 4 [Source:MGI Symbol;Acc:MGI:106530]
Runx3	ENSMUSG00000070691	236.586	0.0884926	11.3004	8.24e-50	runt related transcription factor 3 [Source:MGI Symbol;Acc:MGI:102672]
S100b	ENSMUSG00000033208	998.291	0.0893887	11.1871	3.29e-140	S100 protein, beta polypeptide, neural [Source:MGI Symbol;Acc:MGI:98217]
H2-Q10	ENSMUSG00000067235	225.439	0.0898109	11.1345	2e-50	histocompatibility 2, Q region locus 10 [Source:MGI Symbol;Acc:MGI:95929]
Upb1	ENSMUSG00000033427	29.435	0.0930039	10.7522	4.65e-07	ureidopropionase, beta [Source:MGI Symbol;Acc:MGI:2143535]
Greb1l	ENSMUSG00000042942	50.0622	0.0932371	10.7253	4.78e-13	growth regulation by estrogen in breast cancer-like [Source:MGI Symbol;Acc:MGI:3576497]
Tex15	ENSMUSG00000009628	57.1546	0.0945472	10.5767	4.62e-12	testis expressed gene 15 [Source:MGI Symbol;Acc:MGI:1934816]
Pde9a	ENSMUSG00000041119	283.846	0.094906	10.5367	5.54e-51	phosphodiesterase 9A [Source:MGI Symbol;Acc:MGI:1277179]
Plscr2	ENSMUSG00000032372	51.1889	0.0953248	10.4904	9.13e-13	phospholipid scramblase 2 [Source:MGI Symbol;Acc:MGI:1270860]
Ccdc33	ENSMUSG00000037716	28.934	0.0976244	10.2433	6.43e-05	coiled-coil domain containing 33 [Source:MGI Symbol;Acc:MGI:1922464]
Foxc1	ENSMUSG00000050295	287.965	0.101256	9.87597	1.2e-52	forkhead box C1 [Source:MGI Symbol;Acc:MGI:1347466]
Hid1	ENSMUSG00000034586	768.526	0.102054	9.79876	6.14e-74	HID1 domain containing [Source:MGI Symbol;Acc:MGI:2445087]
Cadps2	ENSMUSG00000017978	57.5726	0.104515	9.568	8.21e-10	Ca2+-dependent activator protein for secretion 2 [Source:MGI Symbol;Acc:MGI:2443963]
Cutal	ENSMUSG00000026870	56.4756	0.105158	9.50953	4.31e-10	cutA divalent cation tolerance homolog-like [Source:MGI Symbol;Acc:MGI:1925246]
Kcnk5	ENSMUSG00000023243	1881.86	0.110271	9.06858	7.78e-137	potassium channel, subfamily K, member 5 [Source:MGI Symbol;Acc:MGI:1336175]
Epha7	ENSMUSG00000028289	86.4605	0.111414	8.97554	1.39e-15	Eph receptor A7 [Source:MGI Symbol;Acc:MGI:95276]
Sox9	ENSMUSG00000000567	1323.7	0.112561	8.88407	1.62e-81	SRY (sex determining region Y)-box 9 [Source:MGI Symbol;Acc:MGI:98371]
Aox3	ENSMUSG00000064294	88.9318	0.113695	8.79546	4.57e-12	aldehyde oxidase 3 [Source:MGI Symbol;Acc:MGI:1918974]
Vamp1	ENSMUSG00000030337	5035.34	0.114184	8.7578	2.6e-240	vesicle-associated membrane protein 1 [Source:MGI Symbol;Acc:MGI:1313276]
Arhgap8	ENSMUSG00000078954	66.0088	0.119476	8.36988	9.83e-16	Rho GTPase activating protein 8 [Source:MGI Symbol;Acc:MGI:1920417]
Psca	ENSMUSG00000022598	173.935	0.121614	8.22277	0.000360697	prostate stem cell antigen [Source:MGI Symbol;Acc:MGI:1919623]
Prr15l	ENSMUSG00000047040	201.543	0.122034	8.19442	6.99e-36	proline rich 15-like [Source:MGI Symbol;Acc:MGI:2387599]
Slc6a2	ENSMUSG00000055368	460.936	0.122846	8.14027	2.31e-53	solute carrier family 6 (neurotransmitter transporter, noradrenalin), member 2 [Source:MGI Symbol;Acc:MGI:1270850]
Pirt	ENSMUSG00000048070	39.4002	0.123551	8.09383	4.79e-07	phosphoinositide-interacting regulator of transient receptor potential channels [Source:MGI Symbol;Acc:MGI:2443635]
Grin1	ENSMUSG00000026959	106.18	0.131285	7.61703	1.05e-17	glutamate receptor, ionotropic, NMDA1 (zeta 1) [Source:MGI Symbol;Acc:MGI:95819]
Tesc	ENSMUSG00000029359	1246.86	0.131796	7.58746	3.34e-88	tescalcin [Source:MGI Symbol;Acc:MGI:1930803]
Lrrc66	ENSMUSG00000067206	29.4771	0.132161	7.56651	1.02e-05	leucine rich repeat containing 66 [Source:MGI Symbol;Acc:MGI:2387634]
Alcam	ENSMUSG00000022636	263.933	0.132611	7.54087	2.92e-38	activated leukocyte cell adhesion molecule [Source:MGI Symbol;Acc:MGI:1313266]
Rims3	ENSMUSG00000032890	57.0661	0.137127	7.29252	8.44e-12	regulating synaptic membrane exocytosis 3 [Source:MGI Symbol;Acc:MGI:2443331]
Shank2	ENSMUSG00000037541	327.332	0.1388	7.20459	1.04e-42	SH3/ankyrin domain gene 2 [Source:MGI Symbol;Acc:MGI:2671987]
Inhbb	ENSMUSG00000037035	677.109	0.138836	7.20273	3.7e-56	inhibin beta-B [Source:MGI Symbol;Acc:MGI:96571]
Plin2	ENSMUSG00000028494	4428.94	0.144215	6.93408	2.39e-203	perilipin 2 [Source:MGI Symbol;Acc:MGI:87920]
Tmprss2	ENSMUSG00000000385	348.03	0.1453	6.88232	2.14e-60	transmembrane protease, serine 2 [Source:MGI Symbol;Acc:MGI:1354381]
Ptpn18	ENSMUSG00000026126	388.535	0.145394	6.87787	8.25e-59	protein tyrosine phosphatase, non-receptor type 18 [Source:MGI Symbol;Acc:MGI:108410]
Plcb1	ENSMUSG00000051177	159.202	0.145588	6.8687	1.39e-18	phospholipase C, beta 1 [Source:MGI Symbol;Acc:MGI:97613]
Ctnnd2	ENSMUSG00000022240	47.1139	0.146352	6.83282	3.45e-06	catenin (cadherin associated protein), delta 2 [Source:MGI Symbol;Acc:MGI:1195966]
Slc20a1	ENSMUSG00000027397	6085.98	0.14703	6.80135	1.79e-161	solute carrier family 20, member 1 [Source:MGI Symbol;Acc:MGI:108392]
Galm	ENSMUSG00000035473	342.554	0.147636	6.77342	2.42e-34	galactose mutarotase [Source:MGI Symbol;Acc:MGI:2442420]
Vsig8	ENSMUSG00000049598	57.0452	0.148179	6.7486	1.91e-07	V-set and immunoglobulin domain containing 8 [Source:MGI Symbol;Acc:MGI:3642995]
Ggt1	ENSMUSG00000006345	34.3565	0.149284	6.69864	2.75e-07	gamma-glutamyltransferase 1 [Source:MGI Symbol;Acc:MGI:95706]
0610040J01Rik	ENSMUSG00000060512	76.0353	0.151401	6.60496	1.46e-13	RIKEN cDNA 0610040J01 gene [Source:MGI Symbol;Acc:MGI:1923511]
Ret	ENSMUSG00000030110	444.793	0.152053	6.57666	1.06e-28	ret proto-oncogene [Source:MGI Symbol;Acc:MGI:97902]
Plcb4	ENSMUSG00000039943	777.655	0.155114	6.44685	6.87e-65	phospholipase C, beta 4 [Source:MGI Symbol;Acc:MGI:107464]
Gabrp	ENSMUSG00000020159	117.341	0.156959	6.37107	2.22e-20	gamma-aminobutyric acid (GABA) A receptor, pi [Source:MGI Symbol;Acc:MGI:2387597]
Slco1a5	ENSMUSG00000063975	118.211	0.157242	6.35962	2.01e-19	solute carrier organic anion transporter family, member 1a5 [Source:MGI Symbol;Acc:MGI:1351865]
Fbxo2	ENSMUSG00000041556	119.019	0.159623	6.26474	1.58e-19	F-box protein 2 [Source:MGI Symbol;Acc:MGI:2446216]
Paqr6	ENSMUSG00000041423	362.013	0.161726	6.1833	1.29e-57	progestin and adipoQ receptor family member VI [Source:MGI Symbol;Acc:MGI:1916207]
Slc12a2	ENSMUSG00000024597	6347.42	0.162133	6.16776	1.35e-125	solute carrier family 12, member 2 [Source:MGI Symbol;Acc:MGI:101924]
Gm266	ENSMUSG00000010529	28.0406	0.162265	6.16277	0.0015391	predicted gene 266 [Source:MGI Symbol;Acc:MGI:2685112]
Col9a3	ENSMUSG00000027570	80.2688	0.162513	6.15335	3.13e-14	collagen, type IX, alpha 3 [Source:MGI Symbol;Acc:MGI:894686]
Cyp2f2	ENSMUSG00000052974	2236.12	0.163096	6.13135	7.23e-42	cytochrome P450, family 2, subfamily f, polypeptide 2 [Source:MGI Symbol;Acc:MGI:88608]
Eya2	ENSMUSG00000017897	257.273	0.163098	6.13128	1.93e-40	EYA transcriptional coactivator and phosphatase 2 [Source:MGI Symbol;Acc:MGI:109341]
Gpx2	ENSMUSG00000042808	436.954	0.16351	6.11584	1.85e-34	glutathione peroxidase 2 [Source:MGI Symbol;Acc:MGI:106609]
Myo5c	ENSMUSG00000033590	622.369	0.163754	6.10671	1.02e-57	myosin VC [Source:MGI Symbol;Acc:MGI:2442485]
Pkp2	ENSMUSG00000041957	128.147	0.16466	6.07312	2.47e-20	plakophilin 2 [Source:MGI Symbol;Acc:MGI:1914701]
Gpr37	ENSMUSG00000039904	34.3851	0.165836	6.03004	1.04e-06	G protein-coupled receptor 37 [Source:MGI Symbol;Acc:MGI:1313297]
Ccbe1	ENSMUSG00000046318	99.6963	0.166091	6.0208	7.05e-13	collagen and calcium binding EGF domains 1 [Source:MGI Symbol;Acc:MGI:2445053]
Cnn1	ENSMUSG00000001349	1336.77	0.166172	6.01786	3.67e-68	calponin 1 [Source:MGI Symbol;Acc:MGI:104979]
Fam65b	ENSMUSG00000036006	108.521	0.169503	5.89959	4.39e-15	family with sequence similarity 65, member B [Source:MGI Symbol;Acc:MGI:2444879]
Wfdc18	ENSMUSG00000000983	896.866	0.171205	5.84096	9.23e-50	WAP four-disulfide core domain 18 [Source:MGI Symbol;Acc:MGI:107506]
Kif26b	ENSMUSG00000026494	127.239	0.175572	5.69567	8.21e-21	kinesin family member 26B [Source:MGI Symbol;Acc:MGI:2447076]
B4galnt1	ENSMUSG00000006731	591.148	0.176988	5.6501	2.84e-58	beta-1,4-N-acetyl-galactosaminyl transferase 1 [Source:MGI Symbol;Acc:MGI:1342057]
Shisa8	ENSMUSG00000096883	37.2885	0.178442	5.60405	1.64e-06	shisa family member 8 [Source:MGI Symbol;Acc:MGI:2146080]
Exoc3l4	ENSMUSG00000021280	88.3518	0.180251	5.54782	1.08e-12	exocyst complex component 3-like 4 [Source:MGI Symbol;Acc:MGI:1921363]
Slc4a4	ENSMUSG00000060961	176.299	0.181761	5.50173	1.57e-13	solute carrier family 4 (anion exchanger), member 4 [Source:MGI Symbol;Acc:MGI:1927555]
Sorl1	ENSMUSG00000049313	1856.02	0.182764	5.47154	1.16e-61	sortilin-related receptor, LDLR class A repeats-containing [Source:MGI Symbol;Acc:MGI:1202296]
Iqgap2	ENSMUSG00000021676	650.567	0.184693	5.41439	2.03e-44	IQ motif containing GTPase activating protein 2 [Source:MGI Symbol;Acc:MGI:2449975]
Inpp5j	ENSMUSG00000034570	66.6201	0.191423	5.22403	1.32e-10	inositol polyphosphate 5-phosphatase J [Source:MGI Symbol;Acc:MGI:2158663]
St8sia6	ENSMUSG00000003418	114.905	0.192595	5.19225	5.35e-15	ST8 alpha-N-acetyl-neuraminide alpha-2,8-sialyltransferase 6 [Source:MGI Symbol;Acc:MGI:2386797]
Itgb8	ENSMUSG00000025321	76.5125	0.192923	5.18342	1.62e-12	integrin beta 8 [Source:MGI Symbol;Acc:MGI:1338035]
Akr1c14	ENSMUSG00000033715	49.0968	0.194348	5.14541	7.33e-06	aldo-keto reductase family 1, member C14 [Source:MGI Symbol;Acc:MGI:2145458]
Cracr2b	ENSMUSG00000048200	1097.75	0.196923	5.07812	4.37e-85	calcium release activated channel regulator 2B [Source:MGI Symbol;Acc:MGI:2446129]
Krt23	ENSMUSG00000006777	1122.08	0.198872	5.02837	1.58e-61	keratin 23 [Source:MGI Symbol;Acc:MGI:2148866]
Sox10	ENSMUSG00000033006	1094.63	0.200345	4.99139	2.6e-59	SRY (sex determining region Y)-box 10 [Source:MGI Symbol;Acc:MGI:98358]
Phlda1	ENSMUSG00000020205	1783.48	0.200456	4.98862	2.66e-54	pleckstrin homology like domain, family A, member 1 [Source:MGI Symbol;Acc:MGI:1096880]
Nkd2	ENSMUSG00000021567	1148.66	0.201388	4.96554	5.42e-62	naked cuticle 2 homolog (Drosophila) [Source:MGI Symbol;Acc:MGI:1919543]
Cryba4	ENSMUSG00000066975	48.4146	0.202643	4.9348	9.07e-08	crystallin, beta A4 [Source:MGI Symbol;Acc:MGI:102716]
Aire	ENSMUSG00000000731	43.7252	0.204882	4.88087	3.81e-07	autoimmune regulator (autoimmune polyendocrinopathy candidiasis ectodermal dystrophy) [Source:MGI Symbol;Acc:MGI:1338803]
Stk39	ENSMUSG00000027030	1542.96	0.205466	4.86699	3.62e-79	serine/threonine kinase 39 [Source:MGI Symbol;Acc:MGI:1858416]
Gmds	ENSMUSG00000038372	224.111	0.206685	4.83827	5.56e-20	GDP-mannose 4, 6-dehydratase [Source:MGI Symbol;Acc:MGI:1891112]
Etnk2	ENSMUSG00000070644	87.9171	0.208928	4.78634	4.47e-08	ethanolamine kinase 2 [Source:MGI Symbol;Acc:MGI:2443760]
Dusp4	ENSMUSG00000031530	110.846	0.209508	4.77308	2.21e-12	dual specificity phosphatase 4 [Source:MGI Symbol;Acc:MGI:2442191]
Slc25a36	ENSMUSG00000032449	2038.04	0.209959	4.76283	4.52e-76	solute carrier family 25, member 36 [Source:MGI Symbol;Acc:MGI:1924909]
Pcp4	ENSMUSG00000090223	73.8151	0.209996	4.76199	1.42e-10	Purkinje cell protein 4 [Source:MGI Symbol;Acc:MGI:97509]
Fads2	ENSMUSG00000024665	423.21	0.21067	4.74676	1.17e-42	fatty acid desaturase 2 [Source:MGI Symbol;Acc:MGI:1930079]
Nbea	ENSMUSG00000027799	259.135	0.211973	4.71758	1.1e-28	neurobeachin [Source:MGI Symbol;Acc:MGI:1347075]
Igsf5	ENSMUSG00000000159	67.5663	0.214061	4.67157	8.24e-09	immunoglobulin superfamily, member 5 [Source:MGI Symbol;Acc:MGI:1919308]
Dact2	ENSMUSG00000048826	280.578	0.214362	4.665	5.91e-32	dishevelled-binding antagonist of beta-catenin 2 [Source:MGI Symbol;Acc:MGI:1920347]
Scube3	ENSMUSG00000038677	84.4703	0.216185	4.62566	1.79e-09	signal peptide, CUB domain, EGF-like 3 [Source:MGI Symbol;Acc:MGI:3045253]
Runx2	ENSMUSG00000039153	56.6441	0.217334	4.6012	0.000145327	runt related transcription factor 2 [Source:MGI Symbol;Acc:MGI:99829]
Pgf	ENSMUSG00000004791	218.425	0.217564	4.59634	1.56e-17	placental growth factor [Source:MGI Symbol;Acc:MGI:105095]
Eda	ENSMUSG00000059327	87.209	0.21889	4.5685	4.7e-10	ectodysplasin-A [Source:MGI Symbol;Acc:MGI:1195272]
	BaseMean>30; FC>4.56 (Eda); padj<0.01; protein_coding

## Sheet: "Secretory-Core" mRNAs
Gene_Name	Gene_ID	baseMean	FC (Ta/WT)	FC (WT/Ta)	padj	Description
Atp6v1b1	ENSMUSG00000006269	5615.65	3.39155e-05	29485.1	7.04e-34	ATPase, H+ transporting, lysosomal V1 subunit B1 [Source:MGI Symbol;Acc:MGI:103285]
Foxi1	ENSMUSG00000047861	734.835	0.000133067	7515.01	4.19e-25	forkhead box I1 [Source:MGI Symbol;Acc:MGI:1096329]
Slc26a4	ENSMUSG00000020651	167.591	0.00113781	878.881	2.71e-14	solute carrier family 26, member 4 [Source:MGI Symbol;Acc:MGI:1346029]
Foxa1	ENSMUSG00000035451	49.2582	0.00198529	503.706	1.72e-11	forkhead box A1 [Source:MGI Symbol;Acc:MGI:1347472]
Clic6	ENSMUSG00000022949	1450.23	0.00231125	432.665	6.75e-130	chloride intracellular channel 6 [Source:MGI Symbol;Acc:MGI:2146607]
Rhcg	ENSMUSG00000030549	180.926	0.00292821	341.505	3.75e-20	Rhesus blood group-associated C glycoprotein [Source:MGI Symbol;Acc:MGI:1888517]
Lrrc26	ENSMUSG00000026961	345.892	0.00358502	278.939	1.94e-44	leucine rich repeat containing 26 [Source:MGI Symbol;Acc:MGI:2385129]
Slc26a7	ENSMUSG00000040569	48.3001	0.0111442	89.7331	5.58e-11	solute carrier family 26, member 7 [Source:MGI Symbol;Acc:MGI:2384791]
Fxyd2	ENSMUSG00000059412	8780.98	0.0161623	61.8723	2.39e-280	FXYD domain-containing ion transport regulator 2 [Source:MGI Symbol;Acc:MGI:1195260]
Kcnq1	ENSMUSG00000009545	406.088	0.0182478	54.8011	2.07e-91	potassium voltage-gated channel, subfamily Q, member 1 [Source:MGI Symbol;Acc:MGI:108083]
Atp2a3	ENSMUSG00000020788	15363.6	0.0191254	52.2864	3.25e-307	ATPase, Ca++ transporting, ubiquitous [Source:MGI Symbol;Acc:MGI:1194503]
Adcy8	ENSMUSG00000022376	196.309	0.0221206	45.2068	2.36e-51	adenylate cyclase 8 [Source:MGI Symbol;Acc:MGI:1341110]
Kit	ENSMUSG00000005672	1742.56	0.0224991	44.4462	5.29e-33	KIT proto-oncogene receptor tyrosine kinase [Source:MGI Symbol;Acc:MGI:96677]
Kcne3	ENSMUSG00000035165	317.95	0.024999	40.0016	2.42e-63	potassium voltage-gated channel, Isk-related subfamily, gene 3 [Source:MGI Symbol;Acc:MGI:1891124]
Gsg1l	ENSMUSG00000046182	47.5899	0.026611	37.5785	6.83e-14	GSG1-like [Source:MGI Symbol;Acc:MGI:2685483]
Ceacam1	ENSMUSG00000074272	1989.49	0.0267228	37.4213	2.22e-233	carcinoembryonic antigen-related cell adhesion molecule 1 [Source:MGI Symbol;Acc:MGI:1347245]
Chrm3	ENSMUSG00000046159	270.137	0.0280974	35.5905	5.13e-16	cholinergic receptor, muscarinic 3, cardiac [Source:MGI Symbol;Acc:MGI:88398]
Ceacam2	ENSMUSG00000054385	478.415	0.0294773	33.9244	2.06e-103	carcinoembryonic antigen-related cell adhesion molecule 2 [Source:MGI Symbol;Acc:MGI:1347246]
Kcnn4	ENSMUSG00000054342	843.975	0.0336061	29.7565	2.03e-108	potassium intermediate/small conductance calcium-activated channel, subfamily N, member 4 [Source:MGI Symbol;Acc:MGI:1277957]
Kcnmb2	ENSMUSG00000037610	48.4227	0.0423951	23.5876	1.76e-12	potassium large conductance calcium-activated channel, subfamily M, beta member 2 [Source:MGI Symbol;Acc:MGI:1919663]
Slc5a8	ENSMUSG00000020062	133.933	0.043698	22.8843	0.00104085	solute carrier family 5 (iodide transporter), member 8 [Source:MGI Symbol;Acc:MGI:2384916]
Shisa7	ENSMUSG00000053550	94.7489	0.046685	21.4202	9.51e-27	shisa family member 7 [Source:MGI Symbol;Acc:MGI:3605641]
Best2	ENSMUSG00000052819	670.926	0.051706	19.3401	3.57e-117	bestrophin 2 [Source:MGI Symbol;Acc:MGI:2387588]
Slc44a3	ENSMUSG00000039865	191.698	0.0615057	16.2587	4.59e-48	solute carrier family 44, member 3 [Source:MGI Symbol;Acc:MGI:2384860]
Vipr1	ENSMUSG00000032528	1293.71	0.0643647	15.5365	1.69e-158	vasoactive intestinal peptide receptor 1 [Source:MGI Symbol;Acc:MGI:109272]
Chrm1	ENSMUSG00000032773	275.425	0.0672575	14.8682	2.29e-73	cholinergic receptor, muscarinic 1, CNS [Source:MGI Symbol;Acc:MGI:88396]
S100b	ENSMUSG00000033208	998.291	0.0893887	11.1871	3.29e-140	S100 protein, beta polypeptide, neural [Source:MGI Symbol;Acc:MGI:98217]
Foxc1	ENSMUSG00000050295	287.965	0.101256	9.87597	1.2e-52	forkhead box C1 [Source:MGI Symbol;Acc:MGI:1347466]
Cadps2	ENSMUSG00000017978	57.5726	0.104515	9.568	8.21e-10	Ca2+-dependent activator protein for secretion 2 [Source:MGI Symbol;Acc:MGI:2443963]
Kcnk5	ENSMUSG00000023243	1881.86	0.110271	9.06858	7.78e-137	potassium channel, subfamily K, member 5 [Source:MGI Symbol;Acc:MGI:1336175]
Vamp1	ENSMUSG00000030337	5035.34	0.114184	8.7578	2.6e-240	vesicle-associated membrane protein 1 [Source:MGI Symbol;Acc:MGI:1313276]
Slc6a2	ENSMUSG00000055368	460.936	0.122846	8.14027	2.31e-53	solute carrier family 6 (neurotransmitter transporter, noradrenalin), member 2 [Source:MGI Symbol;Acc:MGI:1270850]
Pirt	ENSMUSG00000048070	39.4002	0.123551	8.09383	4.79e-07	phosphoinositide-interacting regulator of transient receptor potential channels [Source:MGI Symbol;Acc:MGI:2443635]
Grin1	ENSMUSG00000026959	106.18	0.131285	7.61703	1.05e-17	glutamate receptor, ionotropic, NMDA1 (zeta 1) [Source:MGI Symbol;Acc:MGI:95819]
Tesc	ENSMUSG00000029359	1246.86	0.131796	7.58746	3.34e-88	tescalcin [Source:MGI Symbol;Acc:MGI:1930803]
Rims3	ENSMUSG00000032890	57.0661	0.137127	7.29252	8.44e-12	regulating synaptic membrane exocytosis 3 [Source:MGI Symbol;Acc:MGI:2443331]
Shank2	ENSMUSG00000037541	327.332	0.1388	7.20459	1.04e-42	SH3/ankyrin domain gene 2 [Source:MGI Symbol;Acc:MGI:2671987]
Plcb1	ENSMUSG00000051177	159.202	0.145588	6.8687	1.39e-18	phospholipase C, beta 1 [Source:MGI Symbol;Acc:MGI:97613]
Slc20a1	ENSMUSG00000027397	6085.98	0.14703	6.80135	1.79e-161	solute carrier family 20, member 1 [Source:MGI Symbol;Acc:MGI:108392]
Plcb4	ENSMUSG00000039943	777.655	0.155114	6.44685	6.87e-65	phospholipase C, beta 4 [Source:MGI Symbol;Acc:MGI:107464]
Gabrp	ENSMUSG00000020159	117.341	0.156959	6.37107	2.22e-20	gamma-aminobutyric acid (GABA) A receptor, pi [Source:MGI Symbol;Acc:MGI:2387597]
Slco1a5	ENSMUSG00000063975	118.211	0.157242	6.35962	2.01e-19	solute carrier organic anion transporter family, member 1a5 [Source:MGI Symbol;Acc:MGI:1351865]
Slc12a2	ENSMUSG00000024597	6347.42	0.162133	6.16776	1.35e-125	solute carrier family 12, member 2 [Source:MGI Symbol;Acc:MGI:101924]
Shisa8	ENSMUSG00000096883	37.2885	0.178442	5.60405	1.64e-06	shisa family member 8 [Source:MGI Symbol;Acc:MGI:2146080]
Slc4a4	ENSMUSG00000060961	176.299	0.181761	5.50173	1.57e-13	solute carrier family 4 (anion exchanger), member 4 [Source:MGI Symbol;Acc:MGI:1927555]
Cracr2b	ENSMUSG00000048200	1097.75	0.196923	5.07812	4.37e-85	calcium release activated channel regulator 2B [Source:MGI Symbol;Acc:MGI:2446129]
Pcp4	ENSMUSG00000090223	73.8151	0.209996	4.76199	1.42e-10	Purkinje cell protein 4 [Source:MGI Symbol;Acc:MGI:97509]
	Basemean>30; FC>4.5; padj<0.01; protein_coding
