# Supplementary material for: Characterization of age-associated gene expression changes in mouse sweat glands
Source: Aging (Albany NY). 2024 Apr 17;16(8):6717–30. doi: 10.18632/aging.205776 (PMC11087089; doi:10.18632/aging.205776)
Supplement: Supplementary Table 2 [file aging-16-205776-s002.xlsx]

## Sheet: Dn in O
Supplementary Table 2. mRNAs showing differential expression levels between young and old footpad skin.
Gene_Name	Gene_ID	baseMean	FC (Y/O)	padj	Description
Igf2bp1	ENSMUSG00000013415	54.9301	27.1821	4.77e-07	insulin-like growth factor 2 mRNA binding protein 1 [Source:MGI Symbol;Acc:MGI:1890357]
Lce3b	ENSMUSG00000042031	137.425	26.1427	1.2e-06	late cornified envelope 3B [Source:MGI Symbol;Acc:MGI:1913594]
Ccer2	ENSMUSG00000096257	558.57	16.026	4.99e-90	coiled-coil glutamate-rich protein 2 [Source:MGI Symbol;Acc:MGI:3645242]
Sh2d5	ENSMUSG00000045349	445.592	7.19507	0.00101974	SH2 domain containing 5 [Source:MGI Symbol;Acc:MGI:2446215]
Pdk4	ENSMUSG00000019577	2759.05	5.05997	3.19e-08	pyruvate dehydrogenase kinase, isoenzyme 4 [Source:MGI Symbol;Acc:MGI:1351481]
Klk6	ENSMUSG00000050063	151.89	4.81517	0.00137358	kallikrein related-peptidase 6 [Source:MGI Symbol;Acc:MGI:1343166]
Nptx1	ENSMUSG00000025582	376.725	4.17343	1.63e-18	neuronal pentraxin 1 [Source:MGI Symbol;Acc:MGI:107811]
Mup18	ENSMUSG00000078674	155.704	4.16834	0.00345715	major urinary protein 18 [Source:MGI Symbol;Acc:MGI:3705220]
Mup11	ENSMUSG00000073834	157.834	4.02011	0.00549915	major urinary protein 11 [Source:MGI Symbol;Acc:MGI:3709617]
Kcne1l	ENSMUSG00000090122	57.065	3.9216	1.08e-06	potassium voltage-gated channel, Isk-related family, member 1-like, pseudogene [Source:MGI Symbol;Acc:MGI:1913490]
Ucp3	ENSMUSG00000032942	373.67	3.65176	1.33e-22	uncoupling protein 3 (mitochondrial, proton carrier) [Source:MGI Symbol;Acc:MGI:1099787]
Has3	ENSMUSG00000031910	846.209	3.53801	0.000298565	hyaluronan synthase 3 [Source:MGI Symbol;Acc:MGI:109599]
Lgi2	ENSMUSG00000039252	134.548	3.51722	1.23e-05	leucine-rich repeat LGI family, member 2 [Source:MGI Symbol;Acc:MGI:2180196]
Hp	ENSMUSG00000031722	727.316	3.19229	0.00180574	haptoglobin [Source:MGI Symbol;Acc:MGI:96211]
Ces1h	ENSMUSG00000074156	115.068	3.16337	1.94e-05	carboxylesterase 1H [Source:MGI Symbol;Acc:MGI:1922954]
Cdhr1	ENSMUSG00000021803	656.832	3.01322	0.00662485	cadherin-related family member 1 [Source:MGI Symbol;Acc:MGI:2157782]
Lrrc4	ENSMUSG00000049939	111.046	2.91895	7.83e-11	leucine rich repeat containing 4 [Source:MGI Symbol;Acc:MGI:2182081]
Tacr3	ENSMUSG00000028172	64.6567	2.86842	0.000233827	tachykinin receptor 3 [Source:MGI Symbol;Acc:MGI:892968]
Nav3	ENSMUSG00000020181	236.73	2.82843	4.8e-18	neuron navigator 3 [Source:MGI Symbol;Acc:MGI:2183703]
Sprr2k	ENSMUSG00000054215	145.286	2.72195	0.000210576	small proline-rich protein 2K [Source:MGI Symbol;Acc:MGI:1330344]
Trim15	ENSMUSG00000050747	182.858	2.70614	5.1e-12	tripartite motif-containing 15 [Source:MGI Symbol;Acc:MGI:1916347]
Epgn	ENSMUSG00000035020	369.888	2.66547	0.00214527	epithelial mitogen [Source:MGI Symbol;Acc:MGI:1919170]
Rab3b	ENSMUSG00000003411	51.0768	2.65309	8.45e-06	RAB3B, member RAS oncogene family [Source:MGI Symbol;Acc:MGI:1917158]
Oit1	ENSMUSG00000021749	59.1368	2.63617	6.42e-05	oncoprotein induced transcript 1 [Source:MGI Symbol;Acc:MGI:1201784]
Arsi	ENSMUSG00000036412	172.878	2.63275	4.28e-10	arylsulfatase i [Source:MGI Symbol;Acc:MGI:2670959]
Pcdhga11	ENSMUSG00000102742	61.2588	2.62373	4.01e-07	protocadherin gamma subfamily A, 11 [Source:MGI Symbol;Acc:MGI:1935228]
Angptl4	ENSMUSG00000002289	232.048	2.56152	0.00458194	angiopoietin-like 4 [Source:MGI Symbol;Acc:MGI:1888999]
Urah	ENSMUSG00000025481	3477.97	2.55241	0.00116931	urate (5-hydroxyiso-) hydrolase [Source:MGI Symbol;Acc:MGI:1916142]
Fam83b	ENSMUSG00000032358	877.116	2.54991	0.000688103	family with sequence similarity 83, member B [Source:MGI Symbol;Acc:MGI:2685362]
Scnn1g	ENSMUSG00000000216	502.582	2.54025	1.05e-16	sodium channel, nonvoltage-gated 1 gamma [Source:MGI Symbol;Acc:MGI:104695]
Krt9	ENSMUSG00000051617	178077	2.48384	8.62e-46	keratin 9 [Source:MGI Symbol;Acc:MGI:96696]
Kif17	ENSMUSG00000028758	179.9	2.47226	2.48e-06	kinesin family member 17 [Source:MGI Symbol;Acc:MGI:1098229]
Card14	ENSMUSG00000013483	1674.31	2.39427	4.1e-07	caspase recruitment domain family, member 14 [Source:MGI Symbol;Acc:MGI:2386258]
Slc38a4	ENSMUSG00000022464	140.174	2.39034	1.04e-06	solute carrier family 38, member 4 [Source:MGI Symbol;Acc:MGI:1916604]
Flg2	ENSMUSG00000049133	913.736	2.3897	4.33e-16	filaggrin family member 2 [Source:MGI Symbol;Acc:MGI:3645678]
Celf5	ENSMUSG00000034818	88.9423	2.38177	4.01e-07	CUGBP, Elav-like family member 5 [Source:MGI Symbol;Acc:MGI:2442333]
Ucp1	ENSMUSG00000031710	55.0563	2.35842	0.000140715	uncoupling protein 1 (mitochondrial, proton carrier) [Source:MGI Symbol;Acc:MGI:98894]
Rpl36al	ENSMUSG00000049751	110.836	2.23826	1.58e-05	ribosomal protein L36A-like [Source:MGI Symbol;Acc:MGI:1913733]
Ankle1	ENSMUSG00000046295	224.877	2.23517	1.67e-07	ankyrin repeat and LEM domain containing 1 [Source:MGI Symbol;Acc:MGI:1918775]
Pla2g4e	ENSMUSG00000050211	7070.69	2.1857	2.47e-14	phospholipase A2, group IVE [Source:MGI Symbol;Acc:MGI:1919144]
Slfn4	ENSMUSG00000000204	63.9801	2.15854	0.00526605	schlafen 4 [Source:MGI Symbol;Acc:MGI:1329010]
Gsdmc4	ENSMUSG00000055748	73.4269	2.15575	0.000296348	gasdermin C4 [Source:MGI Symbol;Acc:MGI:1921798]
Cenpe	ENSMUSG00000045328	548.375	2.13581	0.000135488	centromere protein E [Source:MGI Symbol;Acc:MGI:1098230]
Tmprss11f	ENSMUSG00000048764	64.6032	2.13483	4.74e-05	transmembrane protease, serine 11f [Source:MGI Symbol;Acc:MGI:2442348]
Hivep3	ENSMUSG00000028634	573.858	2.11734	0.00753635	human immunodeficiency virus type I enhancer binding protein 3 [Source:MGI Symbol;Acc:MGI:106589]
Slc7a11	ENSMUSG00000027737	552.038	2.11217	1.53e-05	solute carrier family 7 (cationic amino acid transporter, y+ system), member 11 [Source:MGI Symbol;Acc:MGI:1347355]
Dsg1b	ENSMUSG00000061928	13120.4	2.10852	3.09e-05	desmoglein 1 beta [Source:MGI Symbol;Acc:MGI:2664357]
Krtap3-2	ENSMUSG00000069721	299.796	2.10265	1.81e-06	keratin associated protein 3-2 [Source:MGI Symbol;Acc:MGI:1913958]
Foxi1	ENSMUSG00000047861	1092.67	2.06685	5.56e-13	forkhead box I1 [Source:MGI Symbol;Acc:MGI:1096329]
Neu2	ENSMUSG00000079434	821.834	2.05049	0.000118546	neuraminidase 2 [Source:MGI Symbol;Acc:MGI:1344417]
Scd3	ENSMUSG00000025202	104.917	2.03622	0.000138435	stearoyl-coenzyme A desaturase 3 [Source:MGI Symbol;Acc:MGI:1353437]
Smox	ENSMUSG00000027333	777.961	2.03527	0.00819717	spermine oxidase [Source:MGI Symbol;Acc:MGI:2445356]
Cemip	ENSMUSG00000052353	1586.89	2.02529	5.52e-08	cell migration inducing protein, hyaluronan binding [Source:MGI Symbol;Acc:MGI:2443629]
Aox4	ENSMUSG00000038242	4126.96	2.01837	1.21e-19	aldehyde oxidase 4 [Source:MGI Symbol;Acc:MGI:1919122]
Prss27	ENSMUSG00000050762	566.102	2.00429	2.65e-07	protease, serine 27 [Source:MGI Symbol;Acc:MGI:2450123]
Tgm6	ENSMUSG00000027403	171.206	2.00237	1.08e-05	transglutaminase 6 [Source:MGI Symbol;Acc:MGI:3044321]
Mrap	ENSMUSG00000039956	92.215	1.99677	0.00124305	melanocortin 2 receptor accessory protein [Source:MGI Symbol;Acc:MGI:1924287]
Nrip3	ENSMUSG00000034825	138.194	1.9852	3.08e-05	nuclear receptor interacting protein 3 [Source:MGI Symbol;Acc:MGI:1925843]
Ret	ENSMUSG00000030110	431.258	1.97768	2.11e-13	ret proto-oncogene [Source:MGI Symbol;Acc:MGI:97902]
Junb	ENSMUSG00000052837	5911.58	1.97208	4.39e-06	jun B proto-oncogene [Source:MGI Symbol;Acc:MGI:96647]
Samhd1	ENSMUSG00000027639	2907.08	1.96754	2.65e-05	SAM domain and HD domain, 1 [Source:MGI Symbol;Acc:MGI:1927468]
Slc26a4	ENSMUSG00000020651	126.509	1.96263	6.18e-07	solute carrier family 26, member 4 [Source:MGI Symbol;Acc:MGI:1346029]
Atp7a	ENSMUSG00000033792	147.74	1.96013	0.000969395	ATPase, Cu++ transporting, alpha polypeptide [Source:MGI Symbol;Acc:MGI:99400]
Cdkn3	ENSMUSG00000037628	171.004	1.95745	0.000194599	cyclin-dependent kinase inhibitor 3 [Source:MGI Symbol;Acc:MGI:1919641]
Arl4d	ENSMUSG00000034936	1726.11	1.95596	1.21e-06	ADP-ribosylation factor-like 4D [Source:MGI Symbol;Acc:MGI:1933155]
Ube2c	ENSMUSG00000001403	937.868	1.94737	3.82e-10	ubiquitin-conjugating enzyme E2C [Source:MGI Symbol;Acc:MGI:1915862]
Nrg1	ENSMUSG00000062991	233.134	1.9454	0.00261492	neuregulin 1 [Source:MGI Symbol;Acc:MGI:96083]
Padi1	ENSMUSG00000025329	241.309	1.93789	2.01e-05	peptidyl arginine deiminase, type I [Source:MGI Symbol;Acc:MGI:1338893]
Plin2	ENSMUSG00000028494	3958.47	1.92212	8.35e-16	perilipin 2 [Source:MGI Symbol;Acc:MGI:87920]
E2f7	ENSMUSG00000020185	165.322	1.91977	0.000446883	E2F transcription factor 7 [Source:MGI Symbol;Acc:MGI:1289147]
Tbc1d9	ENSMUSG00000031709	2128.51	1.91884	1.49e-07	TBC1 domain family, member 9 [Source:MGI Symbol;Acc:MGI:1918560]
Epha7	ENSMUSG00000028289	71.7525	1.91854	0.00063805	Eph receptor A7 [Source:MGI Symbol;Acc:MGI:95276]
B4galnt4	ENSMUSG00000055629	93.474	1.91221	0.00648056	beta-1,4-N-acetyl-galactosaminyl transferase 4 [Source:MGI Symbol;Acc:MGI:2652891]
Ripk3	ENSMUSG00000022221	262.598	1.90978	1.32e-05	receptor-interacting serine-threonine kinase 3 [Source:MGI Symbol;Acc:MGI:2154952]
Slc26a9	ENSMUSG00000042268	1327.69	1.90414	7.65e-09	solute carrier family 26, member 9 [Source:MGI Symbol;Acc:MGI:2444594]
Slc16a14	ENSMUSG00000026220	230.868	1.9021	4.11e-05	solute carrier family 16 (monocarboxylic acid transporters), member 14 [Source:MGI Symbol;Acc:MGI:1919031]
Lgr6	ENSMUSG00000042793	228.743	1.88794	8.94e-07	leucine-rich repeat-containing G protein-coupled receptor 6 [Source:MGI Symbol;Acc:MGI:2441805]
Dsc2	ENSMUSG00000024331	964.341	1.88612	0.000112371	desmocollin 2 [Source:MGI Symbol;Acc:MGI:103221]
Odc1	ENSMUSG00000011179	7846.35	1.88293	0.000130496	ornithine decarboxylase, structural 1 [Source:MGI Symbol;Acc:MGI:97402]
Ahsg	ENSMUSG00000022868	102.19	1.87978	0.00055041	alpha-2-HS-glycoprotein [Source:MGI Symbol;Acc:MGI:107189]
Col11a2	ENSMUSG00000024330	175.59	1.87572	0.00135089	collagen, type XI, alpha 2 [Source:MGI Symbol;Acc:MGI:88447]
Mthfd2	ENSMUSG00000005667	517.349	1.87236	5.46e-05	methylenetetrahydrofolate dehydrogenase (NAD+ dependent), methenyltetrahydrofolate cyclohydrolase [Source:MGI Symbol;Acc:MGI:1338850]
Tubb3	ENSMUSG00000062380	2817.35	1.87086	6.17e-27	tubulin, beta 3 class III [Source:MGI Symbol;Acc:MGI:107813]
Depdc1b	ENSMUSG00000021697	78.3071	1.85824	0.000648732	DEP domain containing 1B [Source:MGI Symbol;Acc:MGI:2145425]
Ubash3b	ENSMUSG00000032020	773.324	1.85364	0.0001668	ubiquitin associated and SH3 domain containing, B [Source:MGI Symbol;Acc:MGI:1920078]
Sesn2	ENSMUSG00000028893	1096.26	1.85243	1.22e-09	sestrin 2 [Source:MGI Symbol;Acc:MGI:2651874]
Zfp109	ENSMUSG00000074283	67.1071	1.84936	0.00501479	zinc finger protein 109 [Source:MGI Symbol;Acc:MGI:1929099]
Npas2	ENSMUSG00000026077	380.148	1.84791	4.92e-05	neuronal PAS domain protein 2 [Source:MGI Symbol;Acc:MGI:109232]
Edaradd	ENSMUSG00000095105	524.062	1.84607	0.000123792	EDAR (ectodysplasin-A receptor)-associated death domain [Source:MGI Symbol;Acc:MGI:1931001]
Kif20b	ENSMUSG00000024795	324.368	1.84087	3.48e-05	kinesin family member 20B [Source:MGI Symbol;Acc:MGI:2444576]
Nr4a3	ENSMUSG00000028341	209.82	1.82108	0.000987443	nuclear receptor subfamily 4, group A, member 3 [Source:MGI Symbol;Acc:MGI:1352457]
Rbbp8nl	ENSMUSG00000038980	211.323	1.81655	0.000295767	RBBP8 N-terminal like [Source:MGI Symbol;Acc:MGI:3606212]
Car6	ENSMUSG00000028972	1833.82	1.81408	1.8e-09	carbonic anhydrase 6 [Source:MGI Symbol;Acc:MGI:1333786]
Ptk6	ENSMUSG00000038751	1887.86	1.81372	8.34e-07	PTK6 protein tyrosine kinase 6 [Source:MGI Symbol;Acc:MGI:99683]
Scnn1b	ENSMUSG00000030873	991.647	1.80809	1.02e-07	sodium channel, nonvoltage-gated 1 beta [Source:MGI Symbol;Acc:MGI:104696]
Osmr	ENSMUSG00000022146	1346.12	1.80225	0.000620043	oncostatin M receptor [Source:MGI Symbol;Acc:MGI:1330819]
Gsdmc	ENSMUSG00000079025	3338.66	1.79397	3.32e-09	gasdermin C [Source:MGI Symbol;Acc:MGI:1933176]
Rbp2	ENSMUSG00000032454	1355.73	1.79113	3.99e-05	retinol binding protein 2, cellular [Source:MGI Symbol;Acc:MGI:97877]
Nmrk2	ENSMUSG00000004939	137.692	1.7846	0.00525094	nicotinamide riboside kinase 2 [Source:MGI Symbol;Acc:MGI:1916814]
Pif1	ENSMUSG00000041064	423.682	1.78328	0.000699208	PIF1 5'-to-3' DNA helicase [Source:MGI Symbol;Acc:MGI:2143057]
Fam179a	ENSMUSG00000045761	969.634	1.7813	1.75e-07	family with sequence similarity 179, member A [Source:MGI Symbol;Acc:MGI:2443498]
Sh3kbp1	ENSMUSG00000040990	947.895	1.77948	1.14e-09	SH3-domain kinase binding protein 1 [Source:MGI Symbol;Acc:MGI:1889583]
Chrm3	ENSMUSG00000046159	254.297	1.77596	6.95e-07	cholinergic receptor, muscarinic 3, cardiac [Source:MGI Symbol;Acc:MGI:88398]
Pacsin1	ENSMUSG00000040276	144.974	1.77571	0.000510153	protein kinase C and casein kinase substrate in neurons 1 [Source:MGI Symbol;Acc:MGI:1345181]
P2ry4	ENSMUSG00000044359	64.6162	1.77227	0.0041479	pyrimidinergic receptor P2Y, G-protein coupled, 4 [Source:MGI Symbol;Acc:MGI:1926594]
Retn	ENSMUSG00000012705	265.534	1.77216	4.17e-06	resistin [Source:MGI Symbol;Acc:MGI:1888506]
Sbno2	ENSMUSG00000035673	4309.03	1.76544	0.00147888	strawberry notch homolog 2 (Drosophila) [Source:MGI Symbol;Acc:MGI:2448490]
Ccdc160	ENSMUSG00000073207	58.8064	1.75744	0.00167448	coiled-coil domain containing 160 [Source:MGI Symbol;Acc:MGI:3588225]
B4galt4	ENSMUSG00000022793	115.137	1.75476	0.000395885	UDP-Gal:betaGlcNAc beta 1,4-galactosyltransferase, polypeptide 4 [Source:MGI Symbol;Acc:MGI:1928387]
Fkbp5	ENSMUSG00000024222	1820.42	1.75459	0.000117056	FK506 binding protein 5 [Source:MGI Symbol;Acc:MGI:104670]
Tmem125	ENSMUSG00000050854	873.585	1.75354	0.000582518	transmembrane protein 125 [Source:MGI Symbol;Acc:MGI:1923409]
Fv1	ENSMUSG00000070583	184.183	1.74545	3.84e-06	Friend virus susceptibility 1 [Source:MGI Symbol;Acc:MGI:95595]
Knl1	ENSMUSG00000027326	217.471	1.74487	0.00033558	kinetochore scaffold 1 [Source:MGI Symbol;Acc:MGI:1923714]
Tmem26	ENSMUSG00000060044	51.6993	1.74394	0.00775296	transmembrane protein 26 [Source:MGI Symbol;Acc:MGI:2143537]
Lnpep	ENSMUSG00000023845	94.4515	1.74369	0.00144114	leucyl/cystinyl aminopeptidase [Source:MGI Symbol;Acc:MGI:2387123]
St8sia6	ENSMUSG00000003418	157.127	1.74098	5.02e-05	ST8 alpha-N-acetyl-neuraminide alpha-2,8-sialyltransferase 6 [Source:MGI Symbol;Acc:MGI:2386797]
Gm3776	ENSMUSG00000111709	869.213	1.73823	0.0040483	predicted gene 3776 [Source:NCBI gene;Acc:100042295]
Cfap57	ENSMUSG00000028730	81.3406	1.73784	0.00794379	cilia and flagella associated protein 57 [Source:MGI Symbol;Acc:MGI:2686209]
Prdm15	ENSMUSG00000014039	657.678	1.72407	0.000116949	PR domain containing 15 [Source:MGI Symbol;Acc:MGI:1930121]
Slitrk6	ENSMUSG00000045871	417.704	1.72361	2.98e-06	SLIT and NTRK-like family, member 6 [Source:MGI Symbol;Acc:MGI:2443198]
Trpv3	ENSMUSG00000043029	1928.69	1.71937	0.000130496	transient receptor potential cation channel, subfamily V, member 3 [Source:MGI Symbol;Acc:MGI:2181407]
Xkr6	ENSMUSG00000035067	84.5865	1.71044	0.000759978	X-linked Kx blood group related 6 [Source:MGI Symbol;Acc:MGI:2447765]
Dlgap5	ENSMUSG00000037544	576.181	1.71	0.000986819	discs, large (Drosophila) homolog-associated protein 5 [Source:MGI Symbol;Acc:MGI:2183453]
Slc39a10	ENSMUSG00000025986	646.316	1.70994	0.00388646	solute carrier family 39 (zinc transporter), member 10 [Source:MGI Symbol;Acc:MGI:1914515]
Hmmr	ENSMUSG00000020330	528.467	1.70937	0.000167554	hyaluronan mediated motility receptor (RHAMM) [Source:MGI Symbol;Acc:MGI:104667]
Mki67	ENSMUSG00000031004	5049.42	1.70334	0.000138435	antigen identified by monoclonal antibody Ki 67 [Source:MGI Symbol;Acc:MGI:106035]
Mybph	ENSMUSG00000042451	961.873	1.70077	4e-05	myosin binding protein H [Source:MGI Symbol;Acc:MGI:1858196]
Fam83a	ENSMUSG00000051225	584.723	1.69993	0.00416601	family with sequence similarity 83, member A [Source:MGI Symbol;Acc:MGI:2447773]
Liph	ENSMUSG00000044626	308.432	1.69571	6.53e-05	lipase, member H [Source:MGI Symbol;Acc:MGI:2388029]
6430548M08Rik	ENSMUSG00000031824	4685.96	1.69531	3.14e-06	RIKEN cDNA 6430548M08 gene [Source:MGI Symbol;Acc:MGI:2443793]
Fgl2	ENSMUSG00000039899	658.147	1.68787	0.0020053	fibrinogen-like protein 2 [Source:MGI Symbol;Acc:MGI:103266]
Pkp4	ENSMUSG00000026991	2541.91	1.6852	2.29e-06	plakophilin 4 [Source:MGI Symbol;Acc:MGI:109281]
Hspa5	ENSMUSG00000026864	11279.2	1.6806	0.00107989	heat shock protein 5 [Source:MGI Symbol;Acc:MGI:95835]
Kif14	ENSMUSG00000041498	310.699	1.68044	0.00655122	kinesin family member 14 [Source:MGI Symbol;Acc:MGI:1098226]
Zfp36	ENSMUSG00000044786	3117.82	1.67886	0.000969395	zinc finger protein 36 [Source:MGI Symbol;Acc:MGI:99180]
Arid4a	ENSMUSG00000048118	1006.61	1.6788	1.83e-05	AT rich interactive domain 4A (RBP1-like) [Source:MGI Symbol;Acc:MGI:2444354]
Gm10073	ENSMUSG00000060019	920.11	1.67871	1.21e-06	predicted pseudogene 10073 [Source:MGI Symbol;Acc:MGI:3641908]
Aldh1l2	ENSMUSG00000020256	344.095	1.67687	7.62e-05	aldehyde dehydrogenase 1 family, member L2 [Source:MGI Symbol;Acc:MGI:2444680]
Cyp2e1	ENSMUSG00000025479	1022.79	1.67625	0.0025835	cytochrome P450, family 2, subfamily e, polypeptide 1 [Source:MGI Symbol;Acc:MGI:88607]
Tbx6	ENSMUSG00000030699	180.378	1.67536	0.0048002	T-box 6 [Source:MGI Symbol;Acc:MGI:102539]
Gsta1	ENSMUSG00000074183	907.951	1.67274	0.0048002	glutathione S-transferase, alpha 1 (Ya) [Source:MGI Symbol;Acc:MGI:1095417]
E2f8	ENSMUSG00000046179	796.443	1.67139	1.8e-06	E2F transcription factor 8 [Source:MGI Symbol;Acc:MGI:1922038]
Ell2	ENSMUSG00000001542	2072.26	1.66918	0.000180562	elongation factor RNA polymerase II 2 [Source:MGI Symbol;Acc:MGI:2183438]
Slc5a9	ENSMUSG00000028544	1083.61	1.6689	7.15e-07	solute carrier family 5 (sodium/glucose cotransporter), member 9 [Source:MGI Symbol;Acc:MGI:2140201]
Mast4	ENSMUSG00000034751	2817.15	1.66847	0.00161022	microtubule associated serine/threonine kinase family member 4 [Source:MGI Symbol;Acc:MGI:1918885]
Fras1	ENSMUSG00000034687	643.168	1.66637	1.05e-09	Fraser extracellular matrix complex subunit 1 [Source:MGI Symbol;Acc:MGI:2385368]
Defb1	ENSMUSG00000044748	1863.72	1.66577	0.00262419	defensin beta 1 [Source:MGI Symbol;Acc:MGI:1096878]
Prr11	ENSMUSG00000020493	421.509	1.66455	0.000865666	proline rich 11 [Source:MGI Symbol;Acc:MGI:2444496]
Krt84	ENSMUSG00000044294	159.035	1.66281	0.000484053	keratin 84 [Source:MGI Symbol;Acc:MGI:96700]
Krt2	ENSMUSG00000064201	740821	1.66149	1.51e-17	keratin 2 [Source:MGI Symbol;Acc:MGI:96699]
Ust	ENSMUSG00000047712	255.6	1.66001	5.61e-05	uronyl-2-sulfotransferase [Source:MGI Symbol;Acc:MGI:2442406]
Creld2	ENSMUSG00000023272	838.553	1.65991	0.000424578	cysteine-rich with EGF-like domains 2 [Source:MGI Symbol;Acc:MGI:1923987]
Ccnf	ENSMUSG00000072082	775.347	1.65977	0.00123598	cyclin F [Source:MGI Symbol;Acc:MGI:102551]
Pop1	ENSMUSG00000022325	404.967	1.65615	0.00150029	processing of precursor 1, ribonuclease P/MRP family, (S. cerevisiae) [Source:MGI Symbol;Acc:MGI:1914974]
Sntb1	ENSMUSG00000060429	108.287	1.65172	0.00846485	syntrophin, basic 1 [Source:MGI Symbol;Acc:MGI:101781]
Arhgap25	ENSMUSG00000030047	335.586	1.64974	0.000446883	Rho GTPase activating protein 25 [Source:MGI Symbol;Acc:MGI:2443687]
Dsc1	ENSMUSG00000044322	40619	1.64936	0.00138211	desmocollin 1 [Source:MGI Symbol;Acc:MGI:109173]
Hsbp1l1	ENSMUSG00000078963	454.855	1.64374	6.69e-06	heat shock factor binding protein 1-like 1 [Source:MGI Symbol;Acc:MGI:1913505]
Mpp1	ENSMUSG00000031402	1568.36	1.64345	3.6e-08	membrane protein, palmitoylated [Source:MGI Symbol;Acc:MGI:105941]
Tpx2	ENSMUSG00000027469	1162.75	1.64027	0.000212482	TPX2, microtubule-associated [Source:MGI Symbol;Acc:MGI:1919369]
Myh4	ENSMUSG00000057003	22906.7	1.63986	0.000954209	myosin, heavy polypeptide 4, skeletal muscle [Source:MGI Symbol;Acc:MGI:1339713]
Hsph1	ENSMUSG00000029657	1486.52	1.63964	0.00184842	heat shock 105kDa/110kDa protein 1 [Source:MGI Symbol;Acc:MGI:105053]
Elf3	ENSMUSG00000003051	504.123	1.63735	0.00456839	E74-like factor 3 [Source:MGI Symbol;Acc:MGI:1101781]
Tdh	ENSMUSG00000021953	1925.09	1.63595	5.31e-05	L-threonine dehydrogenase [Source:MGI Symbol;Acc:MGI:1926231]
Cenpa	ENSMUSG00000029177	975.975	1.63338	0.00151122	centromere protein A [Source:MGI Symbol;Acc:MGI:88375]
Baz1a	ENSMUSG00000035021	1421.49	1.63263	0.000817543	bromodomain adjacent to zinc finger domain 1A [Source:MGI Symbol;Acc:MGI:1309478]
Ttc37	ENSMUSG00000033991	903.61	1.63148	0.000752383	tetratricopeptide repeat domain 37 [Source:MGI Symbol;Acc:MGI:2679923]
Slc10a6	ENSMUSG00000029321	724.096	1.63143	0.000252142	solute carrier family 10 (sodium/bile acid cotransporter family), member 6 [Source:MGI Symbol;Acc:MGI:1923000]
Cdh3	ENSMUSG00000061048	2298.57	1.63023	0.00263569	cadherin 3 [Source:MGI Symbol;Acc:MGI:88356]
Map3k6	ENSMUSG00000028862	2743.19	1.62963	6.46e-06	mitogen-activated protein kinase kinase kinase 6 [Source:MGI Symbol;Acc:MGI:1855691]
Plk1	ENSMUSG00000030867	778.459	1.62929	0.00298267	polo-like kinase 1 [Source:MGI Symbol;Acc:MGI:97621]
Cenpf	ENSMUSG00000026605	968.879	1.62928	0.00290429	centromere protein F [Source:MGI Symbol;Acc:MGI:1313302]
Kif2c	ENSMUSG00000028678	634.514	1.62378	0.00369038	kinesin family member 2C [Source:MGI Symbol;Acc:MGI:1921054]
Snx22	ENSMUSG00000039452	325.17	1.62169	2.29e-07	sorting nexin 22 [Source:MGI Symbol;Acc:MGI:2685966]
Ccnb2	ENSMUSG00000032218	707.954	1.61387	0.00039541	cyclin B2 [Source:MGI Symbol;Acc:MGI:88311]
Plcxd1	ENSMUSG00000064247	3529.24	1.60971	5.18e-11	phosphatidylinositol-specific phospholipase C, X domain containing 1 [Source:MGI Symbol;Acc:MGI:2685422]
Cfd	ENSMUSG00000061780	4584.94	1.60965	0.000142628	complement factor D (adipsin) [Source:MGI Symbol;Acc:MGI:87931]
Rnf222	ENSMUSG00000046490	902.566	1.60742	0.00024282	ring finger protein 222 [Source:MGI Symbol;Acc:MGI:2443227]
Ppp1r15a	ENSMUSG00000040435	3667.6	1.60617	1.42e-13	protein phosphatase 1, regulatory (inhibitor) subunit 15A [Source:MGI Symbol;Acc:MGI:1927072]
Myo1b	ENSMUSG00000018417	2333.59	1.60475	4.25e-07	myosin IB [Source:MGI Symbol;Acc:MGI:107752]
Hyou1	ENSMUSG00000032115	2861.69	1.60341	0.000376982	hypoxia up-regulated 1 [Source:MGI Symbol;Acc:MGI:108030]
Aurka	ENSMUSG00000027496	565.24	1.6031	0.00233799	aurora kinase A [Source:MGI Symbol;Acc:MGI:894678]
Sphk1	ENSMUSG00000061878	2073.57	1.60035	2.39e-07	sphingosine kinase 1 [Source:MGI Symbol;Acc:MGI:1316649]
Dnah8	ENSMUSG00000033826	195.145	1.59694	0.00539316	dynein, axonemal, heavy chain 8 [Source:MGI Symbol;Acc:MGI:107714]
Fam84a	ENSMUSG00000020607	5191.15	1.59538	5.17e-10	family with sequence similarity 84, member A [Source:MGI Symbol;Acc:MGI:2145011]
Plcxd2	ENSMUSG00000087141	1375.42	1.59467	1.48e-05	phosphatidylinositol-specific phospholipase C, X domain containing 2 [Source:MGI Symbol;Acc:MGI:3647874]
Foxa1	ENSMUSG00000035451	59.2985	1.59428	0.00470007	forkhead box A1 [Source:MGI Symbol;Acc:MGI:1347472]
Skint3	ENSMUSG00000070868	326.411	1.59332	0.00330016	selection and upkeep of intraepithelial T cells 3 [Source:MGI Symbol;Acc:MGI:3045331]
Spink7	ENSMUSG00000060201	2360.94	1.5931	0.000836666	serine peptidase inhibitor, Kazal type 7 (putative) [Source:MGI Symbol;Acc:MGI:3644691]
Irak4	ENSMUSG00000059883	708.925	1.59309	7.17e-07	interleukin-1 receptor-associated kinase 4 [Source:MGI Symbol;Acc:MGI:2182474]
Magi3	ENSMUSG00000052539	1039.13	1.59307	1.37e-05	membrane associated guanylate kinase, WW and PDZ domain containing 3 [Source:MGI Symbol;Acc:MGI:1923484]
Myd88	ENSMUSG00000032508	1842.19	1.59302	0.00115624	myeloid differentiation primary response gene 88 [Source:MGI Symbol;Acc:MGI:108005]
Carmil2	ENSMUSG00000050357	62.1478	1.59299	0.00805715	capping protein regulator and myosin 1 linker 2 [Source:MGI Symbol;Acc:MGI:2685431]
Tmem229b	ENSMUSG00000046157	7529.81	1.59023	3.44e-13	transmembrane protein 229B [Source:MGI Symbol;Acc:MGI:2444389]
Slc6a19	ENSMUSG00000021565	1923.4	1.58753	1.14e-09	solute carrier family 6 (neurotransmitter transporter), member 19 [Source:MGI Symbol;Acc:MGI:1921588]
Sdf2l1	ENSMUSG00000022769	223.859	1.5867	0.0027443	stromal cell-derived factor 2-like 1 [Source:MGI Symbol;Acc:MGI:2149842]
Rasd1	ENSMUSG00000049892	230.794	1.58612	0.00110813	RAS, dexamethasone-induced 1 [Source:MGI Symbol;Acc:MGI:1270848]
Grhl2	ENSMUSG00000022286	2256.74	1.58445	1.07e-05	grainyhead-like 2 (Drosophila) [Source:MGI Symbol;Acc:MGI:2182543]
Csf2rb	ENSMUSG00000071713	572.685	1.58419	0.00773741	colony stimulating factor 2 receptor, beta, low-affinity (granulocyte-macrophage) [Source:MGI Symbol;Acc:MGI:1339759]
Nfkbiz	ENSMUSG00000035356	2435.6	1.5818	0.00013845	nuclear factor of kappa light polypeptide gene enhancer in B cells inhibitor, zeta [Source:MGI Symbol;Acc:MGI:1931595]
Scd1	ENSMUSG00000037071	10942	1.58139	9.6e-06	stearoyl-Coenzyme A desaturase 1 [Source:MGI Symbol;Acc:MGI:98239]
Rbm27	ENSMUSG00000024491	1868.74	1.57975	1.57e-05	RNA binding motif protein 27 [Source:MGI Symbol;Acc:MGI:2147194]
Kif4	ENSMUSG00000034311	582.31	1.57381	0.000135399	kinesin family member 4 [Source:MGI Symbol;Acc:MGI:108389]
Aknad1	ENSMUSG00000049565	386.506	1.5729	0.000423293	AKNA domain containing 1 [Source:MGI Symbol;Acc:MGI:3584453]
Slc5a1	ENSMUSG00000011034	4136.13	1.5718	0.00134169	solute carrier family 5 (sodium/glucose cotransporter), member 1 [Source:MGI Symbol;Acc:MGI:107678]
Tmprss11e	ENSMUSG00000054537	1182.73	1.56955	0.000638756	transmembrane protease, serine 11e [Source:MGI Symbol;Acc:MGI:3513175]
Prr9	ENSMUSG00000056270	139.69	1.56733	0.00732235	proline rich 9 [Source:MGI Symbol;Acc:MGI:1925680]
Gpt2	ENSMUSG00000031700	1869.11	1.56702	2.39e-09	glutamic pyruvate transaminase (alanine aminotransferase) 2 [Source:MGI Symbol;Acc:MGI:1915391]
Rasl11b	ENSMUSG00000049907	801.671	1.56554	5.76e-08	RAS-like, family 11, member B [Source:MGI Symbol;Acc:MGI:1916189]
Myf6	ENSMUSG00000035923	405.893	1.56134	0.00438891	myogenic factor 6 [Source:MGI Symbol;Acc:MGI:97253]
Ppif	ENSMUSG00000021868	7614.73	1.55763	8.53e-06	peptidylprolyl isomerase F (cyclophilin F) [Source:MGI Symbol;Acc:MGI:2145814]
Fndc9	ENSMUSG00000048721	2630.32	1.55579	4.71e-06	fibronectin type III domain containing 9 [Source:MGI Symbol;Acc:MGI:2443410]
Endou	ENSMUSG00000022468	4533.36	1.55558	0.000658346	endonuclease, polyU-specific [Source:MGI Symbol;Acc:MGI:97746]
Knstrn	ENSMUSG00000027331	653.375	1.55404	0.000903151	kinetochore-localized astrin/SPAG5 binding [Source:MGI Symbol;Acc:MGI:1289298]
Fzd4	ENSMUSG00000049791	1092.86	1.55335	5.59e-05	frizzled class receptor 4 [Source:MGI Symbol;Acc:MGI:108520]
Sgol1	ENSMUSG00000023940	302.494	1.55318	0.0011519	shugoshin-like 1 (S. pombe) [Source:MGI Symbol;Acc:MGI:1919665]
Ada	ENSMUSG00000017697	380.645	1.55281	0.000825743	adenosine deaminase [Source:MGI Symbol;Acc:MGI:87916]
Top2a	ENSMUSG00000020914	3197.6	1.55079	8.4e-05	topoisomerase (DNA) II alpha [Source:MGI Symbol;Acc:MGI:98790]
Itsn2	ENSMUSG00000020640	3067.54	1.54642	0.00014054	intersectin 2 [Source:MGI Symbol;Acc:MGI:1338049]
Nrg4	ENSMUSG00000032311	70.278	1.54575	0.00491176	neuregulin 4 [Source:MGI Symbol;Acc:MGI:1933833]
Kcnab3	ENSMUSG00000018470	111.366	1.5456	0.00772353	potassium voltage-gated channel, shaker-related subfamily, beta member 3 [Source:MGI Symbol;Acc:MGI:1336208]
Nr1d1	ENSMUSG00000020889	9933.68	1.54558	0.0019137	nuclear receptor subfamily 1, group D, member 1 [Source:MGI Symbol;Acc:MGI:2444210]
Il1f9	ENSMUSG00000044103	3999.53	1.5423	0.000378308	interleukin 1 family, member 9 [Source:MGI Symbol;Acc:MGI:2449929]
Nusap1	ENSMUSG00000027306	922.863	1.54081	0.00179469	nucleolar and spindle associated protein 1 [Source:MGI Symbol;Acc:MGI:2675669]
Kif18b	ENSMUSG00000051378	454.163	1.53917	0.00197919	kinesin family member 18B [Source:MGI Symbol;Acc:MGI:2446979]
Aspm	ENSMUSG00000033952	562.631	1.53724	0.0021435	asp (abnormal spindle)-like, microcephaly associated (Drosophila) [Source:MGI Symbol;Acc:MGI:1334448]
Slc27a3	ENSMUSG00000027932	910.51	1.53712	0.00024282	solute carrier family 27 (fatty acid transporter), member 3 [Source:MGI Symbol;Acc:MGI:1347358]
Atp2a3	ENSMUSG00000020788	15718.1	1.53451	5.97e-07	ATPase, Ca++ transporting, ubiquitous [Source:MGI Symbol;Acc:MGI:1194503]
Pabpc1	ENSMUSG00000022283	20640.6	1.53387	6.66e-05	poly(A) binding protein, cytoplasmic 1 [Source:MGI Symbol;Acc:MGI:1349722]
Pdia4	ENSMUSG00000025823	1943.41	1.53272	0.000965046	protein disulfide isomerase associated 4 [Source:MGI Symbol;Acc:MGI:104864]
Bub1b	ENSMUSG00000040084	813.128	1.53214	9e-05	BUB1B, mitotic checkpoint serine/threonine kinase [Source:MGI Symbol;Acc:MGI:1333889]
Rbm47	ENSMUSG00000070780	524.468	1.53019	0.000541314	RNA binding motif protein 47 [Source:MGI Symbol;Acc:MGI:2384294]
Sltm	ENSMUSG00000032212	3751.62	1.52952	4.84e-06	SAFB-like, transcription modulator [Source:MGI Symbol;Acc:MGI:1913910]
Kctd21	ENSMUSG00000044952	151.607	1.52907	0.00840636	potassium channel tetramerisation domain containing 21 [Source:MGI Symbol;Acc:MGI:3643121]
Maf	ENSMUSG00000055435	4630.58	1.52793	1.91e-06	avian musculoaponeurotic fibrosarcoma oncogene homolog [Source:MGI Symbol;Acc:MGI:96909]
Hsp90b1	ENSMUSG00000020048	7531.77	1.52787	0.000268445	heat shock protein 90, beta (Grp94), member 1 [Source:MGI Symbol;Acc:MGI:98817]
Cwh43	ENSMUSG00000029154	1331.5	1.52769	9.01e-05	cell wall biogenesis 43 C-terminal homolog [Source:MGI Symbol;Acc:MGI:2444131]
Pglyrp4	ENSMUSG00000042250	978.687	1.52763	0.00244836	peptidoglycan recognition protein 4 [Source:MGI Symbol;Acc:MGI:2686324]
Trex2	ENSMUSG00000031372	3391.17	1.52728	4.83e-05	three prime repair exonuclease 2 [Source:MGI Symbol;Acc:MGI:1346343]
Slc28a3	ENSMUSG00000021553	1721.4	1.52705	2.16e-05	solute carrier family 28 (sodium-coupled nucleoside transporter), member 3 [Source:MGI Symbol;Acc:MGI:2137361]
Phlda1	ENSMUSG00000020205	2004.94	1.52679	0.000893303	pleckstrin homology like domain, family A, member 1 [Source:MGI Symbol;Acc:MGI:1096880]
Ylpm1	ENSMUSG00000021244	1530.74	1.52409	0.000392473	YLP motif containing 1 [Source:MGI Symbol;Acc:MGI:1926195]
Rcn1	ENSMUSG00000005973	3972.26	1.52309	3.8e-07	reticulocalbin 1 [Source:MGI Symbol;Acc:MGI:104559]
Kif11	ENSMUSG00000012443	1021.22	1.52298	0.000494244	kinesin family member 11 [Source:MGI Symbol;Acc:MGI:1098231]
Pcdh7	ENSMUSG00000029108	630.663	1.52196	0.00286769	protocadherin 7 [Source:MGI Symbol;Acc:MGI:1860487]
Nkpd1	ENSMUSG00000060621	3452.53	1.52184	7.92e-05	NTPase, KAP family P-loop domain containing 1 [Source:MGI Symbol;Acc:MGI:1916797]
Rdh16	ENSMUSG00000069456	82.9131	1.52158	0.00924217	retinol dehydrogenase 16 [Source:MGI Symbol;Acc:MGI:1201375]
Hyal4	ENSMUSG00000029680	146.28	1.52132	0.000904721	hyaluronoglucosaminidase 4 [Source:MGI Symbol;Acc:MGI:1924292]
Sprr1b	ENSMUSG00000048455	36736.3	1.52004	0.00172272	small proline-rich protein 1B [Source:MGI Symbol;Acc:MGI:106659]
Top1	ENSMUSG00000070544	2319.4	1.51973	0.00235848	topoisomerase (DNA) I [Source:MGI Symbol;Acc:MGI:98788]
Syt8	ENSMUSG00000031098	174.934	1.51956	0.00245269	synaptotagmin VIII [Source:MGI Symbol;Acc:MGI:1859867]
Col15a1	ENSMUSG00000028339	874.822	1.51874	0.00504969	collagen, type XV, alpha 1 [Source:MGI Symbol;Acc:MGI:88449]
Mxd1	ENSMUSG00000001156	3940.34	1.51742	6.46e-06	MAX dimerization protein 1 [Source:MGI Symbol;Acc:MGI:96908]
Csf2rb2	ENSMUSG00000071714	607.108	1.51728	0.00522509	colony stimulating factor 2 receptor, beta 2, low-affinity (granulocyte-macrophage) [Source:MGI Symbol;Acc:MGI:1339760]
Clec2g	ENSMUSG00000000248	1290.79	1.51574	4.24e-09	C-type lectin domain family 2, member g [Source:MGI Symbol;Acc:MGI:1918059]
Ubtd2	ENSMUSG00000044949	171.157	1.51514	0.00200265	ubiquitin domain containing 2 [Source:MGI Symbol;Acc:MGI:2444752]
Lrrc20	ENSMUSG00000037151	4148.33	1.51336	4.98e-13	leucine rich repeat containing 20 [Source:MGI Symbol;Acc:MGI:2387182]
Lama3	ENSMUSG00000024421	2609.08	1.51302	0.0013597	laminin, alpha 3 [Source:MGI Symbol;Acc:MGI:99909]
Mapk6	ENSMUSG00000042688	8318.77	1.5122	0.00178059	mitogen-activated protein kinase 6 [Source:MGI Symbol;Acc:MGI:1354946]
Ralbp1	ENSMUSG00000024096	9229.45	1.50635	2.13e-07	ralA binding protein 1 [Source:MGI Symbol;Acc:MGI:108466]
Bcl11b	ENSMUSG00000048251	1693.92	1.50357	0.00125303	B cell leukemia/lymphoma 11B [Source:MGI Symbol;Acc:MGI:1929913]
Ovol1	ENSMUSG00000024922	7257.78	1.50192	8.68e-05	ovo like zinc finger 1 [Source:MGI Symbol;Acc:MGI:1330290]
Procr	ENSMUSG00000027611	549.967	1.50089	0.00374864	protein C receptor, endothelial [Source:MGI Symbol;Acc:MGI:104596]
Best2	ENSMUSG00000052819	566.652	1.46361	0.0118833	bestrophin 2 [Source:MGI Symbol;Acc:MGI:2387588]
	FC>1.5; Basemean>50; padj<0.01; protein coding

## Sheet: Up in O
Gene_Name	Gene_ID	baseMean	FC (Y/O)	padj	Description	miRBase_Accession	miRBase_ID
Aldh3a1	ENSMUSG00000019102	4838.68	0.388501	4.83e-34	aldehyde dehydrogenase family 3, subfamily A1 [Source:MGI Symbol;Acc:MGI:1353451]
Gsta3	ENSMUSG00000025934	384.986	0.325834	1.67e-28	glutathione S-transferase, alpha 3 [Source:MGI Symbol;Acc:MGI:95856]
Snhg11	ENSMUSG00000044349	277.195	0.262531	8.55e-28	small nucleolar RNA host gene 11 [Source:MGI Symbol;Acc:MGI:2441845]
H2-Q6	ENSMUSG00000073409	197.868	0.276247	1.19e-18	histocompatibility 2, Q region locus 6 [Source:MGI Symbol;Acc:MGI:95935]
Krt7	ENSMUSG00000023039	789.893	0.378065	2.4e-18	keratin 7 [Source:MGI Symbol;Acc:MGI:96704]
Mcm6	ENSMUSG00000026355	1552.56	0.563389	2.07e-17	minichromosome maintenance complex component 6 [Source:MGI Symbol;Acc:MGI:1298227]
Dkk3	ENSMUSG00000030772	1432.47	0.476716	9.01e-17	dickkopf WNT signaling pathway inhibitor 3 [Source:MGI Symbol;Acc:MGI:1354952]
Ccnd1	ENSMUSG00000070348	11223.3	0.527821	4.46e-16	cyclin D1 [Source:MGI Symbol;Acc:MGI:88313]
Slc16a11	ENSMUSG00000040938	968.576	0.554564	1.48e-15	solute carrier family 16 (monocarboxylic acid transporters), member 11 [Source:MGI Symbol;Acc:MGI:2663709]
E2f1	ENSMUSG00000027490	322.723	0.430785	2.28e-15	E2F transcription factor 1 [Source:MGI Symbol;Acc:MGI:101941]
Fbln7	ENSMUSG00000027386	94.4925	0.225021	1.5e-14	fibulin 7 [Source:MGI Symbol;Acc:MGI:1917620]
Espn	ENSMUSG00000028943	120.923	0.258903	1.5e-14	espin [Source:MGI Symbol;Acc:MGI:1861630]
Cdt1	ENSMUSG00000006585	406.065	0.460041	1.52e-14	chromatin licensing and DNA replication factor 1 [Source:MGI Symbol;Acc:MGI:1914427]
Stra6	ENSMUSG00000032327	937.375	0.55803	1.58e-14	stimulated by retinoic acid gene 6 [Source:MGI Symbol;Acc:MGI:107742]
Aspa	ENSMUSG00000020774	179.741	0.381886	3.22e-14	aspartoacylase [Source:MGI Symbol;Acc:MGI:87914]
Fndc10	ENSMUSG00000074738	384.015	0.465895	1.05e-13	fibronectin type III domain containing 10 [Source:MGI Symbol;Acc:MGI:2444790]
Apod	ENSMUSG00000022548	6299.61	0.336448	1.46e-13	apolipoprotein D [Source:MGI Symbol;Acc:MGI:88056]
Gins2	ENSMUSG00000031821	236.835	0.48067	2.12e-13	GINS complex subunit 2 (Psf2 homolog) [Source:MGI Symbol;Acc:MGI:1921019]
Nt5e	ENSMUSG00000032420	733.172	0.521897	3.6e-13	5' nucleotidase, ecto [Source:MGI Symbol;Acc:MGI:99782]
Mcm2	ENSMUSG00000002870	862.668	0.550245	4.86e-13	minichromosome maintenance complex component 2 [Source:MGI Symbol;Acc:MGI:105380]
Lyz1	ENSMUSG00000069515	548.523	0.274636	1.68e-12	lysozyme 1 [Source:MGI Symbol;Acc:MGI:96902]
Vsig4	ENSMUSG00000044206	108.936	0.196071	3.21e-12	V-set and immunoglobulin domain containing 4 [Source:MGI Symbol;Acc:MGI:2679720]
H2-Q7	ENSMUSG00000060550	214.509	0.346983	4.9e-12	histocompatibility 2, Q region locus 7 [Source:MGI Symbol;Acc:MGI:95936]
Ostn	ENSMUSG00000052276	85.7363	0.220715	5.1e-12	osteocrin [Source:MGI Symbol;Acc:MGI:2677164]
F2r	ENSMUSG00000048376	632.038	0.48357	7.34e-12	coagulation factor II (thrombin) receptor [Source:MGI Symbol;Acc:MGI:101802]
Vsnl1	ENSMUSG00000054459	166.799	0.436467	1.29e-11	visinin-like 1 [Source:MGI Symbol;Acc:MGI:1349453]
Smpdl3b	ENSMUSG00000028885	338.064	0.568871	1.77e-11	sphingomyelin phosphodiesterase, acid-like 3B [Source:MGI Symbol;Acc:MGI:1916022]
C4b	ENSMUSG00000073418	4761.34	0.501852	2.03e-11	complement component 4B (Chido blood group) [Source:MGI Symbol;Acc:MGI:88228]
Cdca7l	ENSMUSG00000021175	888.764	0.621196	3.02e-11	cell division cycle associated 7 like [Source:MGI Symbol;Acc:MGI:2384982]
Gm996	ENSMUSG00000029419	65.3074	0.202934	6.45e-11	predicted gene 996 [Source:MGI Symbol;Acc:MGI:2685842]
Slc6a7	ENSMUSG00000052026	109.866	0.265788	8.13e-11	solute carrier family 6 (neurotransmitter transporter, L-proline), member 7 [Source:MGI Symbol;Acc:MGI:2147363]
Ppp2r2c	ENSMUSG00000029120	734.044	0.579716	1.04e-10	protein phosphatase 2, regulatory subunit B, gamma [Source:MGI Symbol;Acc:MGI:2442660]
Wnt11	ENSMUSG00000015957	266.394	0.47907	1.34e-10	wingless-type MMTV integration site family, member 11 [Source:MGI Symbol;Acc:MGI:101948]
F13a1	ENSMUSG00000039109	1576.79	0.55252	1.34e-10	coagulation factor XIII, A1 subunit [Source:MGI Symbol;Acc:MGI:1921395]
Aspn	ENSMUSG00000021388	859.024	0.450339	1.99e-10	asporin [Source:MGI Symbol;Acc:MGI:1913945]
Crip1	ENSMUSG00000006360	6710.12	0.551729	1.99e-10	cysteine-rich protein 1 (intestinal) [Source:MGI Symbol;Acc:MGI:88501]
Pou3f1	ENSMUSG00000090125	92.8221	0.289361	2.77e-10	POU domain, class 3, transcription factor 1 [Source:MGI Symbol;Acc:MGI:101896]
Gstt1	ENSMUSG00000001663	251.792	0.434273	3.12e-10	glutathione S-transferase, theta 1 [Source:MGI Symbol;Acc:MGI:107379]
Olig1	ENSMUSG00000046160	66.2657	0.222919	3.82e-10	oligodendrocyte transcription factor 1 [Source:MGI Symbol;Acc:MGI:1355334]
Hoxc8	ENSMUSG00000001657	358.718	0.497139	3.84e-10	homeobox C8 [Source:MGI Symbol;Acc:MGI:96198]
Chaf1b	ENSMUSG00000022945	344.57	0.520879	5.61e-10	chromatin assembly factor 1, subunit B (p60) [Source:MGI Symbol;Acc:MGI:1314881]
Ccl8	ENSMUSG00000009185	167.951	0.27139	1.71e-09	chemokine (C-C motif) ligand 8 [Source:MGI Symbol;Acc:MGI:101878]
Rhcg	ENSMUSG00000030549	249.993	0.574109	2e-09	Rhesus blood group-associated C glycoprotein [Source:MGI Symbol;Acc:MGI:1888517]
Cdkn2a	ENSMUSG00000044303	30.86	0.155252	3.02e-09	cyclin-dependent kinase inhibitor 2A [Source:MGI Symbol;Acc:MGI:104738]
Adh7	ENSMUSG00000055301	4185.37	0.584144	3.02e-09	alcohol dehydrogenase 7 (class IV), mu or sigma polypeptide [Source:MGI Symbol;Acc:MGI:87926]
Wnt9a	ENSMUSG00000000126	219.263	0.472819	3.74e-09	wingless-type MMTV integration site family, member 9A [Source:MGI Symbol;Acc:MGI:2446084]
Slc2a5	ENSMUSG00000028976	206.443	0.44506	4.24e-09	solute carrier family 2 (facilitated glucose transporter), member 5 [Source:MGI Symbol;Acc:MGI:1928369]
Rasl10a	ENSMUSG00000034209	147.446	0.467752	4.99e-09	RAS-like, family 10, member A [Source:MGI Symbol;Acc:MGI:1922918]
Hmcn2	ENSMUSG00000055632	552.155	0.475139	6.01e-09	hemicentin 2 [Source:MGI Symbol;Acc:MGI:2677838]
Rfc3	ENSMUSG00000033970	454.418	0.59159	9.68e-09	replication factor C (activator 1) 3 [Source:MGI Symbol;Acc:MGI:1916513]
Azin2	ENSMUSG00000028789	382.376	0.44093	1.02e-08	antizyme inhibitor 2 [Source:MGI Symbol;Acc:MGI:2442093]
Emb	ENSMUSG00000021728	347.147	0.536091	1.57e-08	embigin [Source:MGI Symbol;Acc:MGI:95321]
Agmo	ENSMUSG00000050103	111.886	0.389715	1.71e-08	alkylglycerol monooxygenase [Source:MGI Symbol;Acc:MGI:2442495]
Gnb1l	ENSMUSG00000000884	602.508	0.643352	2.15e-08	guanine nucleotide binding protein (G protein), beta polypeptide 1-like [Source:MGI Symbol;Acc:MGI:1338057]
Sec14l2	ENSMUSG00000003585	1186.21	0.56158	2.51e-08	SEC14-like lipid binding 2 [Source:MGI Symbol;Acc:MGI:1915065]
Col9a1	ENSMUSG00000026147	92.2602	0.342267	2.67e-08	collagen, type IX, alpha 1 [Source:MGI Symbol;Acc:MGI:88465]
Myoc	ENSMUSG00000026697	3615.1	0.47397	3.47e-08	myocilin [Source:MGI Symbol;Acc:MGI:1202864]
Cd209b	ENSMUSG00000065987	52.8193	0.270991	5.07e-08	CD209b antigen [Source:MGI Symbol;Acc:MGI:1916415]
Hells	ENSMUSG00000025001	284.129	0.416254	5.52e-08	helicase, lymphoid specific [Source:MGI Symbol;Acc:MGI:106209]
Il12rb2	ENSMUSG00000018341	188.012	0.501581	5.52e-08	interleukin 12 receptor, beta 2 [Source:MGI Symbol;Acc:MGI:1270861]
Nudt17	ENSMUSG00000028100	169.103	0.545581	5.71e-08	nudix (nucleoside diphosphate linked moiety X)-type motif 17 [Source:MGI Symbol;Acc:MGI:1925623]
Lhfpl4	ENSMUSG00000042873	63.8119	0.325103	5.76e-08	lipoma HMGIC fusion partner-like protein 4 [Source:MGI Symbol;Acc:MGI:3057108]
Lig1	ENSMUSG00000056394	1025.59	0.665389	6.75e-08	ligase I, DNA, ATP-dependent [Source:MGI Symbol;Acc:MGI:101789]
Bpifb3	ENSMUSG00000068008	599.128	0.519699	8.94e-08	BPI fold containing family B, member 3 [Source:MGI Symbol;Acc:MGI:2675077]
Lrrc38	ENSMUSG00000028584	85.3924	0.304724	9.3e-08	leucine rich repeat containing 38 [Source:MGI Symbol;Acc:MGI:2442845]
Axl	ENSMUSG00000002602	3959.47	0.64852	1.28e-07	AXL receptor tyrosine kinase [Source:MGI Symbol;Acc:MGI:1347244]
Dlx6	ENSMUSG00000029754	73.7191	0.368821	1.32e-07	distal-less homeobox 6 [Source:MGI Symbol;Acc:MGI:101927]
Rgcc	ENSMUSG00000022018	382.37	0.591819	1.32e-07	regulator of cell cycle [Source:MGI Symbol;Acc:MGI:1913464]
Bbox1	ENSMUSG00000041660	648.936	0.575307	1.37e-07	butyrobetaine (gamma), 2-oxoglutarate dioxygenase 1 (gamma-butyrobetaine hydroxylase) [Source:MGI Symbol;Acc:MGI:1891372]
Dtl	ENSMUSG00000037474	229.436	0.443087	1.66e-07	denticleless E3 ubiquitin protein ligase [Source:MGI Symbol;Acc:MGI:1924093]
Tap2	ENSMUSG00000024339	770.447	0.580782	2.2e-07	transporter 2, ATP-binding cassette, sub-family B (MDR/TAP) [Source:MGI Symbol;Acc:MGI:98484]
S100a4	ENSMUSG00000001020	482.511	0.548606	2.34e-07	S100 calcium binding protein A4 [Source:MGI Symbol;Acc:MGI:1330282]
Efemp1	ENSMUSG00000020467	1103.72	0.567314	2.6e-07	epidermal growth factor-containing fibulin-like extracellular matrix protein 1 [Source:MGI Symbol;Acc:MGI:1339998]
Cbs	ENSMUSG00000024039	502.98	0.504419	2.99e-07	cystathionine beta-synthase [Source:MGI Symbol;Acc:MGI:88285]
Hacd4	ENSMUSG00000028497	83.4809	0.445144	3.4e-07	3-hydroxyacyl-CoA dehydratase 4 [Source:MGI Symbol;Acc:MGI:1914025]
Hsd11b1	ENSMUSG00000016194	154.119	0.370764	3.79e-07	hydroxysteroid 11-beta dehydrogenase 1 [Source:MGI Symbol;Acc:MGI:103562]
Fcna	ENSMUSG00000026938	111.123	0.395456	3.8e-07	ficolin A [Source:MGI Symbol;Acc:MGI:1340905]
Islr2	ENSMUSG00000051243	174.006	0.493085	4.17e-07	immunoglobulin superfamily containing leucine-rich repeat 2 [Source:MGI Symbol;Acc:MGI:2444277]
H2-Q4	ENSMUSG00000035929	601.758	0.587409	4.17e-07	histocompatibility 2, Q region locus 4 [Source:MGI Symbol;Acc:MGI:95933]
Eif5a2	ENSMUSG00000050192	119.665	0.442165	4.18e-07	eukaryotic translation initiation factor 5A2 [Source:MGI Symbol;Acc:MGI:1933735]
Uhrf1	ENSMUSG00000001228	1412.74	0.640294	4.77e-07	ubiquitin-like, containing PHD and RING finger domains, 1 [Source:MGI Symbol;Acc:MGI:1338889]
Foxred2	ENSMUSG00000016552	212.266	0.530938	7.38e-07	FAD-dependent oxidoreductase domain containing 2 [Source:MGI Symbol;Acc:MGI:106315]
Gnao1	ENSMUSG00000031748	213.666	0.580727	1.01e-06	guanine nucleotide binding protein, alpha O [Source:MGI Symbol;Acc:MGI:95775]
Fbln5	ENSMUSG00000021186	478.326	0.57508	1.04e-06	fibulin 5 [Source:MGI Symbol;Acc:MGI:1346091]
2610301B20Rik	ENSMUSG00000059482	266.529	0.522218	1.15e-06	RIKEN cDNA 2610301B20 gene [Source:MGI Symbol;Acc:MGI:1914407]
Cys1	ENSMUSG00000062563	206.401	0.461029	1.18e-06	cystin 1 [Source:MGI Symbol;Acc:MGI:2177632]
Sncg	ENSMUSG00000023064	502.252	0.514817	1.25e-06	synuclein, gamma [Source:MGI Symbol;Acc:MGI:1298397]
Kcnq2	ENSMUSG00000016346	99.9917	0.36378	1.65e-06	potassium voltage-gated channel, subfamily Q, member 2 [Source:MGI Symbol;Acc:MGI:1309503]
Pygo1	ENSMUSG00000034910	186.396	0.508229	1.77e-06	pygopus 1 [Source:MGI Symbol;Acc:MGI:1919385]
Fbln2	ENSMUSG00000064080	2604.35	0.576631	1.99e-06	fibulin 2 [Source:MGI Symbol;Acc:MGI:95488]
Prkcg	ENSMUSG00000078816	212.906	0.59027	1.99e-06	protein kinase C, gamma [Source:MGI Symbol;Acc:MGI:97597]
Mr1	ENSMUSG00000026471	587.689	0.638402	2.11e-06	major histocompatibility complex, class I-related [Source:MGI Symbol;Acc:MGI:1195463]
Dact2	ENSMUSG00000048826	297.235	0.530581	2.62e-06	dishevelled-binding antagonist of beta-catenin 2 [Source:MGI Symbol;Acc:MGI:1920347]
Lhfpl2	ENSMUSG00000045312	199.926	0.569244	2.64e-06	lipoma HMGIC fusion partner-like 2 [Source:MGI Symbol;Acc:MGI:2145236]
Bmp5	ENSMUSG00000032179	151.896	0.518219	2.81e-06	bone morphogenetic protein 5 [Source:MGI Symbol;Acc:MGI:88181]
Fam81a	ENSMUSG00000032224	652.933	0.665282	2.81e-06	family with sequence similarity 81, member A [Source:MGI Symbol;Acc:MGI:1924136]
Nxph4	ENSMUSG00000040258	229.534	0.564608	2.93e-06	neurexophilin 4 [Source:MGI Symbol;Acc:MGI:1336197]
Cpeb1	ENSMUSG00000025586	374.486	0.59503	2.93e-06	cytoplasmic polyadenylation element binding protein 1 [Source:MGI Symbol;Acc:MGI:108442]
Hcn4	ENSMUSG00000032338	183.437	0.487917	2.98e-06	hyperpolarization-activated, cyclic nucleotide-gated K+ 4 [Source:MGI Symbol;Acc:MGI:1298209]
Mlc1	ENSMUSG00000035805	95.7562	0.4421	3.14e-06	megalencephalic leukoencephalopathy with subcortical cysts 1 homolog (human) [Source:MGI Symbol;Acc:MGI:2157910]
Ntng2	ENSMUSG00000035513	454.69	0.555294	3.79e-06	netrin G2 [Source:MGI Symbol;Acc:MGI:2159341]
Rflnb	ENSMUSG00000020846	734.698	0.646681	4.17e-06	refilin B [Source:MGI Symbol;Acc:MGI:1923816]
Islr	ENSMUSG00000037206	822.384	0.502496	4.56e-06	immunoglobulin superfamily containing leucine-rich repeat [Source:MGI Symbol;Acc:MGI:1349645]
Tdp2	ENSMUSG00000035958	555.265	0.664597	4.9e-06	tyrosyl-DNA phosphodiesterase 2 [Source:MGI Symbol;Acc:MGI:1860486]
Orc1	ENSMUSG00000028587	86.7366	0.508401	5.91e-06	origin recognition complex, subunit 1 [Source:MGI Symbol;Acc:MGI:1328337]
Tspoap1	ENSMUSG00000034156	278.423	0.53915	6.36e-06	TSPO associated protein 1 [Source:MGI Symbol;Acc:MGI:2450877]
Hpn	ENSMUSG00000001249	159.564	0.538954	6.6e-06	hepsin [Source:MGI Symbol;Acc:MGI:1196620]
Ccdc85a	ENSMUSG00000032878	52.3028	0.28356	6.92e-06	coiled-coil domain containing 85A [Source:MGI Symbol;Acc:MGI:2445069]
Cd300ld3	ENSMUSG00000069607	100.891	0.427019	7.24e-06	CD300 molecule like family member D3 [Source:MGI Symbol;Acc:MGI:2687214]
Mgst2	ENSMUSG00000074604	962.035	0.639075	7.39e-06	microsomal glutathione S-transferase 2 [Source:MGI Symbol;Acc:MGI:2448481]
Kirrel	ENSMUSG00000041734	649.347	0.663725	7.39e-06	kin of IRRE like (Drosophila) [Source:MGI Symbol;Acc:MGI:1891396]
Tgif2	ENSMUSG00000062175	109.337	0.487013	7.4e-06	TGFB-induced factor homeobox 2 [Source:MGI Symbol;Acc:MGI:1915299]
Wdr90	ENSMUSG00000073434	440.523	0.613547	7.74e-06	WD repeat domain 90 [Source:MGI Symbol;Acc:MGI:1921267]
Syngr1	ENSMUSG00000022415	220.841	0.603853	8.28e-06	synaptogyrin 1 [Source:MGI Symbol;Acc:MGI:1328323]
Fam117a	ENSMUSG00000038893	330.96	0.597653	8.45e-06	family with sequence similarity 117, member A [Source:MGI Symbol;Acc:MGI:2144564]
Fxyd7	ENSMUSG00000036578	121.271	0.529023	8.73e-06	FXYD domain-containing ion transport regulator 7 [Source:MGI Symbol;Acc:MGI:1889006]
Ung	ENSMUSG00000029591	207.473	0.487593	9.13e-06	uracil DNA glycosylase [Source:MGI Symbol;Acc:MGI:109352]
Anxa3	ENSMUSG00000029484	700.674	0.649753	9.13e-06	annexin A3 [Source:MGI Symbol;Acc:MGI:1201378]
Kazald1	ENSMUSG00000025213	327.375	0.501473	9.27e-06	Kazal-type serine peptidase inhibitor domain 1 [Source:MGI Symbol;Acc:MGI:2147606]
Mcm3	ENSMUSG00000041859	841.217	0.58602	9.52e-06	minichromosome maintenance complex component 3 [Source:MGI Symbol;Acc:MGI:101845]
Fxyd4	ENSMUSG00000004988	54.3772	0.343981	1e-05	FXYD domain-containing ion transport regulator 4 [Source:MGI Symbol;Acc:MGI:1889005]
Ampd1	ENSMUSG00000070385	1451.95	0.521599	1.07e-05	adenosine monophosphate deaminase 1 [Source:MGI Symbol;Acc:MGI:88015]
Prrt4	ENSMUSG00000079654	101.974	0.435231	1.17e-05	proline-rich transmembrane protein 4 [Source:MGI Symbol;Acc:MGI:2141677]
Aebp1	ENSMUSG00000020473	2307.95	0.525481	1.19e-05	AE binding protein 1 [Source:MGI Symbol;Acc:MGI:1197012]
Lamc3	ENSMUSG00000026840	329.987	0.542866	1.22e-05	laminin gamma 3 [Source:MGI Symbol;Acc:MGI:1344394]
Wee1	ENSMUSG00000031016	785.491	0.547375	1.26e-05	WEE 1 homolog 1 (S. pombe) [Source:MGI Symbol;Acc:MGI:103075]
Selenop	ENSMUSG00000064373	4475.64	0.576237	1.26e-05	selenoprotein P [Source:MGI Symbol;Acc:MGI:894288]
Cirbp	ENSMUSG00000045193	3200.8	0.612403	1.46e-05	cold inducible RNA binding protein [Source:MGI Symbol;Acc:MGI:893588]
Wisp2	ENSMUSG00000027656	642.048	0.477111	1.53e-05	WNT1 inducible signaling pathway protein 2 [Source:MGI Symbol;Acc:MGI:1328326]
Sfrp5	ENSMUSG00000018822	579.485	0.416969	1.61e-05	secreted frizzled-related sequence protein 5 [Source:MGI Symbol;Acc:MGI:1860298]
Lsmem1	ENSMUSG00000071342	54.6772	0.3846	1.83e-05	leucine-rich single-pass membrane protein 1 [Source:MGI Symbol;Acc:MGI:2685735]
Adcy7	ENSMUSG00000031659	331.182	0.626399	2.02e-05	adenylate cyclase 7 [Source:MGI Symbol;Acc:MGI:102891]
Muc3a	ENSMUSG00000094840	75.4579	0.370272	2.03e-05	mucin 3A, cell surface associated [Source:MGI Symbol;Acc:MGI:3588263]
Scara3	ENSMUSG00000034463	1214.74	0.52026	2.04e-05	scavenger receptor class A, member 3 [Source:MGI Symbol;Acc:MGI:2444418]
Rorc	ENSMUSG00000028150	1194.87	0.583233	2.11e-05	RAR-related orphan receptor gamma [Source:MGI Symbol;Acc:MGI:104856]
Lbh	ENSMUSG00000024063	1144.33	0.608091	2.16e-05	limb-bud and heart [Source:MGI Symbol;Acc:MGI:1925139]
Pcdh19	ENSMUSG00000051323	86.3779	0.539768	2.24e-05	protocadherin 19 [Source:MGI Symbol;Acc:MGI:2685563]
Wfdc18	ENSMUSG00000000983	3319.68	0.331904	2.36e-05	WAP four-disulfide core domain 18 [Source:MGI Symbol;Acc:MGI:107506]
Cd36	ENSMUSG00000002944	1189.02	0.514534	2.41e-05	CD36 antigen [Source:MGI Symbol;Acc:MGI:107899]
Samd9l	ENSMUSG00000047735	323.519	0.620074	2.57e-05	sterile alpha motif domain containing 9-like [Source:MGI Symbol;Acc:MGI:1343184]
Rhoq	ENSMUSG00000024143	1178.64	0.659996	2.68e-05	ras homolog family member Q [Source:MGI Symbol;Acc:MGI:1931553]
Col12a1	ENSMUSG00000032332	804.362	0.550154	2.72e-05	collagen, type XII, alpha 1 [Source:MGI Symbol;Acc:MGI:88448]
Cd209d	ENSMUSG00000031495	91.2768	0.464051	2.78e-05	CD209d antigen [Source:MGI Symbol;Acc:MGI:2157947]
Dkk2	ENSMUSG00000028031	104.161	0.504376	2.78e-05	dickkopf WNT signaling pathway inhibitor 2 [Source:MGI Symbol;Acc:MGI:1890663]
Id4	ENSMUSG00000021379	365.608	0.516683	2.78e-05	inhibitor of DNA binding 4 [Source:MGI Symbol;Acc:MGI:99414]
Prkaa2	ENSMUSG00000028518	652.603	0.65963	2.78e-05	protein kinase, AMP-activated, alpha 2 catalytic subunit [Source:MGI Symbol;Acc:MGI:1336173]
Cryz	ENSMUSG00000028199	295.38	0.648317	2.82e-05	crystallin, zeta [Source:MGI Symbol;Acc:MGI:88527]
Ptch2	ENSMUSG00000028681	108.566	0.500447	3.04e-05	patched 2 [Source:MGI Symbol;Acc:MGI:1095405]
Arhgap22	ENSMUSG00000063506	164.623	0.561137	3.04e-05	Rho GTPase activating protein 22 [Source:MGI Symbol;Acc:MGI:2443418]
Them6	ENSMUSG00000056665	195.029	0.554937	3.05e-05	thioesterase superfamily member 6 [Source:MGI Symbol;Acc:MGI:1925301]
Plp1	ENSMUSG00000031425	554.575	0.64296	3.12e-05	proteolipid protein (myelin) 1 [Source:MGI Symbol;Acc:MGI:97623]
Wfdc2	ENSMUSG00000017723	1288.61	0.589785	3.24e-05	WAP four-disulfide core domain 2 [Source:MGI Symbol;Acc:MGI:1914951]
Slamf9	ENSMUSG00000026548	66.0004	0.401059	3.35e-05	SLAM family member 9 [Source:MGI Symbol;Acc:MGI:1923692]
Btc	ENSMUSG00000082361	250.947	0.534641	3.36e-05	betacellulin, epidermal growth factor family member [Source:MGI Symbol;Acc:MGI:99439]
Tnni1	ENSMUSG00000026418	1092.92	0.478238	3.7e-05	troponin I, skeletal, slow 1 [Source:MGI Symbol;Acc:MGI:105073]
Cped1	ENSMUSG00000062980	351.094	0.633806	3.78e-05	cadherin-like and PC-esterase domain containing 1 [Source:MGI Symbol;Acc:MGI:2444814]
Akr1c13	ENSMUSG00000021213	101.695	0.437695	3.87e-05	aldo-keto reductase family 1, member C13 [Source:MGI Symbol;Acc:MGI:1351662]
Kif26b	ENSMUSG00000026494	146.812	0.489375	3.87e-05	kinesin family member 26B [Source:MGI Symbol;Acc:MGI:2447076]
Hsf2	ENSMUSG00000019878	326.212	0.656989	4.12e-05	heat shock factor 2 [Source:MGI Symbol;Acc:MGI:96239]
Camk2n1	ENSMUSG00000046447	787.468	0.654681	4.39e-05	calcium/calmodulin-dependent protein kinase II inhibitor 1 [Source:MGI Symbol;Acc:MGI:1913509]
Retnla	ENSMUSG00000061100	350.842	0.149984	4.7e-05	resistin like alpha [Source:MGI Symbol;Acc:MGI:1888504]
Abca8a	ENSMUSG00000041828	553.273	0.581908	4.81e-05	ATP-binding cassette, sub-family A (ABC1), member 8a [Source:MGI Symbol;Acc:MGI:2386846]
Ogn	ENSMUSG00000021390	141.215	0.514127	5.67e-05	osteoglycin [Source:MGI Symbol;Acc:MGI:109278]
Svip	ENSMUSG00000074093	172.688	0.613063	5.72e-05	small VCP/p97-interacting protein [Source:MGI Symbol;Acc:MGI:1922994]
Vit	ENSMUSG00000024076	421.353	0.617986	5.72e-05	vitrin [Source:MGI Symbol;Acc:MGI:1921449]
Timp2	ENSMUSG00000017466	6145.67	0.648095	5.76e-05	tissue inhibitor of metalloproteinase 2 [Source:MGI Symbol;Acc:MGI:98753]
Pou6f1	ENSMUSG00000009739	617.531	0.580228	6.49e-05	POU domain, class 6, transcription factor 1 [Source:MGI Symbol;Acc:MGI:102935]
Ccne2	ENSMUSG00000028212	195.45	0.542561	6.6e-05	cyclin E2 [Source:MGI Symbol;Acc:MGI:1329034]
Slc22a18	ENSMUSG00000000154	228.548	0.622459	7.51e-05	solute carrier family 22 (organic cation transporter), member 18 [Source:MGI Symbol;Acc:MGI:1336884]
Bhlhe41	ENSMUSG00000030256	695.266	0.575821	7.62e-05	basic helix-loop-helix family, member e41 [Source:MGI Symbol;Acc:MGI:1930704]
Tspan33	ENSMUSG00000001763	71.9722	0.469685	7.71e-05	tetraspanin 33 [Source:MGI Symbol;Acc:MGI:1919012]
Bbs5	ENSMUSG00000063145	159.524	0.612503	8.57e-05	Bardet-Biedl syndrome 5 (human) [Source:MGI Symbol;Acc:MGI:1919819]
Abca8b	ENSMUSG00000020620	294.669	0.583517	8.68e-05	ATP-binding cassette, sub-family A (ABC1), member 8b [Source:MGI Symbol;Acc:MGI:1351668]
Mapk15	ENSMUSG00000063704	601.698	0.608147	9.32e-05	mitogen-activated protein kinase 15 [Source:MGI Symbol;Acc:MGI:2652894]
Scarf2	ENSMUSG00000012017	336.952	0.492126	9.52e-05	scavenger receptor class F, member 2 [Source:MGI Symbol;Acc:MGI:1858430]
Rfx2	ENSMUSG00000024206	1702.29	0.492176	0.000100843	regulatory factor X, 2 (influences HLA class II expression) [Source:MGI Symbol;Acc:MGI:106583]
Iqcb1	ENSMUSG00000022837	179.268	0.650601	0.000107531	IQ calmodulin-binding motif containing 1 [Source:MGI Symbol;Acc:MGI:2443764]
Tmem116	ENSMUSG00000029452	159.739	0.56961	0.000108006	transmembrane protein 116 [Source:MGI Symbol;Acc:MGI:1924712]
Lyz2	ENSMUSG00000069516	5224.12	0.572846	0.000112876	lysozyme 2 [Source:MGI Symbol;Acc:MGI:96897]
Iffo1	ENSMUSG00000038271	330.007	0.636853	0.000112953	intermediate filament family orphan 1 [Source:MGI Symbol;Acc:MGI:2444516]
Lgr5	ENSMUSG00000020140	82.4669	0.507209	0.000118126	leucine rich repeat containing G protein coupled receptor 5 [Source:MGI Symbol;Acc:MGI:1341817]
Cry1	ENSMUSG00000020038	856.33	0.611355	0.000119499	cryptochrome 1 (photolyase-like) [Source:MGI Symbol;Acc:MGI:1270841]
Tmem119	ENSMUSG00000054675	307.062	0.4994	0.000123478	transmembrane protein 119 [Source:MGI Symbol;Acc:MGI:2385228]
Hoxa9	ENSMUSG00000038227	84.6172	0.516616	0.000123792	homeobox A9 [Source:MGI Symbol;Acc:MGI:96180]
Dnm1	ENSMUSG00000026825	1000.33	0.618224	0.000125971	dynamin 1 [Source:MGI Symbol;Acc:MGI:107384]
Cd83	ENSMUSG00000015396	74.8654	0.391144	0.00014054	CD83 antigen [Source:MGI Symbol;Acc:MGI:1328316]
Cybb	ENSMUSG00000015340	191.326	0.507204	0.000142628	cytochrome b-245, beta polypeptide [Source:MGI Symbol;Acc:MGI:88574]
Fxyd6	ENSMUSG00000066705	3082.87	0.650285	0.000143601	FXYD domain-containing ion transport regulator 6 [Source:MGI Symbol;Acc:MGI:1890226]
C2	ENSMUSG00000024371	137.056	0.58773	0.000151804	complement component 2 (within H-2S) [Source:MGI Symbol;Acc:MGI:88226]
Gm45871	ENSMUSG00000110277	99.3897	0.529137	0.000156252	predicted gene 45871 [Source:MGI Symbol;Acc:MGI:5804986]
Sdc2	ENSMUSG00000022261	802.537	0.636629	0.000160424	syndecan 2 [Source:MGI Symbol;Acc:MGI:1349165]
Abca9	ENSMUSG00000041797	196.889	0.559294	0.000162751	ATP-binding cassette, sub-family A (ABC1), member 9 [Source:MGI Symbol;Acc:MGI:2386796]
Fignl2	ENSMUSG00000095440	257.35	0.635784	0.000162751	fidgetin-like 2 [Source:MGI Symbol;Acc:MGI:3646919]
Ric3	ENSMUSG00000048330	52.3905	0.486149	0.000173748	RIC3 acetylcholine receptor chaperone [Source:MGI Symbol;Acc:MGI:2443887]
Cmc4	ENSMUSG00000090110	91.9853	0.49254	0.000176665	C-x(9)-C motif containing 4 [Source:MGI Symbol;Acc:MGI:5637812]
Klhl23	ENSMUSG00000042155	447.493	0.633828	0.000193943	kelch-like 23 [Source:MGI Symbol;Acc:MGI:2683536]
Chek1	ENSMUSG00000032113	140.727	0.612592	0.000202743	checkpoint kinase 1 [Source:MGI Symbol;Acc:MGI:1202065]
Lrrc36	ENSMUSG00000054320	72.4629	0.442829	0.000203164	leucine rich repeat containing 36 [Source:MGI Symbol;Acc:MGI:2448585]
Nat8f3	ENSMUSG00000051262	50.0499	0.451244	0.000208532	N-acetyltransferase 8 (GCN5-related) family member 3 [Source:MGI Symbol;Acc:MGI:2136449]
Egf	ENSMUSG00000028017	258.653	0.617526	0.000211596	epidermal growth factor [Source:MGI Symbol;Acc:MGI:95290]
Lama5	ENSMUSG00000015647	5298.09	0.652053	0.000212482	laminin, alpha 5 [Source:MGI Symbol;Acc:MGI:105382]
Clec14a	ENSMUSG00000045930	177.613	0.61599	0.000215761	C-type lectin domain family 14, member a [Source:MGI Symbol;Acc:MGI:1914114]
Cyp2s1	ENSMUSG00000040703	1346.7	0.642793	0.000221809	cytochrome P450, family 2, subfamily s, polypeptide 1 [Source:MGI Symbol;Acc:MGI:1921384]
Slc17a9	ENSMUSG00000023393	146.885	0.611106	0.000222111	solute carrier family 17, member 9 [Source:MGI Symbol;Acc:MGI:1919107]
Osbpl6	ENSMUSG00000042359	50.138	0.409304	0.000223411	oxysterol binding protein-like 6 [Source:MGI Symbol;Acc:MGI:2139014]
Zfp367	ENSMUSG00000044934	415.557	0.606704	0.000224187	zinc finger protein 367 [Source:MGI Symbol;Acc:MGI:2442266]
Per2	ENSMUSG00000055866	1401.68	0.343	0.00024282	period circadian clock 2 [Source:MGI Symbol;Acc:MGI:1195265]
Igf1	ENSMUSG00000020053	642.9	0.560281	0.00024282	insulin-like growth factor 1 [Source:MGI Symbol;Acc:MGI:96432]
Nkd2	ENSMUSG00000021567	1800.46	0.639445	0.00024282	naked cuticle 2 homolog (Drosophila) [Source:MGI Symbol;Acc:MGI:1919543]
Scn7a	ENSMUSG00000034810	341.636	0.64449	0.000247484	sodium channel, voltage-gated, type VII, alpha [Source:MGI Symbol;Acc:MGI:102965]
Rpa2	ENSMUSG00000028884	562.492	0.660414	0.000248212	replication protein A2 [Source:MGI Symbol;Acc:MGI:1339939]
Prrx2	ENSMUSG00000039476	116.147	0.539338	0.000250358	paired related homeobox 2 [Source:MGI Symbol;Acc:MGI:98218]
Cck	ENSMUSG00000032532	94.1077	0.525926	0.000253267	cholecystokinin [Source:MGI Symbol;Acc:MGI:88297]
Fbp2	ENSMUSG00000021456	438.475	0.624291	0.000262049	fructose bisphosphatase 2 [Source:MGI Symbol;Acc:MGI:95491]
Cd209f	ENSMUSG00000051906	148.142	0.391403	0.000263762	CD209f antigen [Source:MGI Symbol;Acc:MGI:1916392]
Pltp	ENSMUSG00000017754	1783.85	0.617469	0.000264423	phospholipid transfer protein [Source:MGI Symbol;Acc:MGI:103151]
Hoxa13	ENSMUSG00000038203	147.917	0.648403	0.000268445	homeobox A13 [Source:MGI Symbol;Acc:MGI:96173]
Heyl	ENSMUSG00000032744	206.002	0.539152	0.000275471	hairy/enhancer-of-split related with YRPW motif-like [Source:MGI Symbol;Acc:MGI:1860511]
Col8a1	ENSMUSG00000068196	487.753	0.659242	0.000281232	collagen, type VIII, alpha 1 [Source:MGI Symbol;Acc:MGI:88463]
Cyba	ENSMUSG00000006519	339.938	0.615079	0.00028691	cytochrome b-245, alpha polypeptide [Source:MGI Symbol;Acc:MGI:1316658]
Trdmt1	ENSMUSG00000026723	185.638	0.611189	0.000294432	tRNA aspartic acid methyltransferase 1 [Source:MGI Symbol;Acc:MGI:1274787]
Frzb	ENSMUSG00000027004	56.2892	0.456697	0.000298297	frizzled-related protein [Source:MGI Symbol;Acc:MGI:892032]
Camkv	ENSMUSG00000032936	64.0063	0.375438	0.000307329	CaM kinase-like vesicle-associated [Source:MGI Symbol;Acc:MGI:2384296]
Cd300ld5	ENSMUSG00000089722	106.705	0.489849	0.00030798	CD300 molecule like family member D5 [Source:MGI Symbol;Acc:MGI:3702661]
Apol7a	ENSMUSG00000010601	116.138	0.537706	0.000327866	apolipoprotein L 7a [Source:MGI Symbol;Acc:MGI:1923011]
Hist1h2be	ENSMUSG00000047246	194.705	0.646247	0.000333103	histone cluster 1, H2be [Source:MGI Symbol;Acc:MGI:2448380]
Car14	ENSMUSG00000038526	213.425	0.567542	0.00033357	carbonic anhydrase 14 [Source:MGI Symbol;Acc:MGI:1344341]
Aldh1a3	ENSMUSG00000015134	166.581	0.563572	0.000364149	aldehyde dehydrogenase family 1, subfamily A3 [Source:MGI Symbol;Acc:MGI:1861722]
Nbl1	ENSMUSG00000041120	2851.41	0.613008	0.000393845	neuroblastoma, suppression of tumorigenicity 1 [Source:MGI Symbol;Acc:MGI:104591]
Tmem200b	ENSMUSG00000070720	156.903	0.514027	0.000398609	transmembrane protein 200B [Source:MGI Symbol;Acc:MGI:3646343]
Tmem191c	ENSMUSG00000055692	52.812	0.511292	0.000399146	transmembrane protein 191C [Source:MGI Symbol;Acc:MGI:107238]
Cd209g	ENSMUSG00000079168	86.6328	0.37157	0.00041212	CD209g antigen [Source:MGI Symbol;Acc:MGI:1917442]
Nrn1	ENSMUSG00000039114	157.697	0.594615	0.00041212	neuritin 1 [Source:MGI Symbol;Acc:MGI:1915654]
Hoxc5	ENSMUSG00000022485	129.886	0.560369	0.000416723	homeobox C5 [Source:MGI Symbol;Acc:MGI:96196]
Igfbp4	ENSMUSG00000017493	3677.73	0.627673	0.000424465	insulin-like growth factor binding protein 4 [Source:MGI Symbol;Acc:MGI:96439]
Wnt5b	ENSMUSG00000030170	118.056	0.480383	0.000424898	wingless-type MMTV integration site family, member 5B [Source:MGI Symbol;Acc:MGI:98959]
Cxcl13	ENSMUSG00000023078	83.4501	0.1765	0.000441163	chemokine (C-X-C motif) ligand 13 [Source:MGI Symbol;Acc:MGI:1888499]
Dusp26	ENSMUSG00000039661	241.47	0.450755	0.000449716	dual specificity phosphatase 26 (putative) [Source:MGI Symbol;Acc:MGI:1914209]
Rab6b	ENSMUSG00000032549	551.886	0.627228	0.000456248	RAB6B, member RAS oncogene family [Source:MGI Symbol;Acc:MGI:107283]
Csf1r	ENSMUSG00000024621	1444.81	0.659222	0.000476269	colony stimulating factor 1 receptor [Source:MGI Symbol;Acc:MGI:1339758]
Akap7	ENSMUSG00000039166	282.834	0.651589	0.000519724	A kinase (PRKA) anchor protein 7 [Source:MGI Symbol;Acc:MGI:1859150]
Cd33	ENSMUSG00000004609	142.366	0.614012	0.000537692	CD33 antigen [Source:MGI Symbol;Acc:MGI:99440]
Scx	ENSMUSG00000034161	65.2352	0.482242	0.000538766	scleraxis [Source:MGI Symbol;Acc:MGI:102934]
Thnsl1	ENSMUSG00000048550	148.173	0.628928	0.000543141	threonine synthase-like 1 (bacterial) [Source:MGI Symbol;Acc:MGI:2139347]
Gm14685	ENSMUSG00000067771	61.8656	0.557205	0.000545687	predicted gene 14685 [Source:MGI Symbol;Acc:MGI:3710618]
Mpp2	ENSMUSG00000017314	504.54	0.579316	0.000546491	membrane protein, palmitoylated 2 (MAGUK p55 subfamily member 2) [Source:MGI Symbol;Acc:MGI:1858257]
Myl2	ENSMUSG00000013936	246.092	0.143653	0.000589759	myosin, light polypeptide 2, regulatory, cardiac, slow [Source:MGI Symbol;Acc:MGI:97272]
Vtcn1	ENSMUSG00000051076	113.646	0.613944	0.000590901	V-set domain containing T cell activation inhibitor 1 [Source:MGI Symbol;Acc:MGI:3039619]
Zdhhc15	ENSMUSG00000033906	108.138	0.545747	0.000591045	zinc finger, DHHC domain containing 15 [Source:MGI Symbol;Acc:MGI:1915336]
Olah	ENSMUSG00000026645	482.884	0.634466	0.000604372	oleoyl-ACP hydrolase [Source:MGI Symbol;Acc:MGI:2139018]
Jund	ENSMUSG00000071076	4198.36	0.661139	0.000618486	jun D proto-oncogene [Source:MGI Symbol;Acc:MGI:96648]
Cdkn1c	ENSMUSG00000037664	149.952	0.610946	0.000635583	cyclin-dependent kinase inhibitor 1C (P57) [Source:MGI Symbol;Acc:MGI:104564]
Dpysl2	ENSMUSG00000022048	334.575	0.584213	0.00063805	dihydropyrimidinase-like 2 [Source:MGI Symbol;Acc:MGI:1349763]
Fhl1	ENSMUSG00000023092	20390.8	0.628681	0.000649009	four and a half LIM domains 1 [Source:MGI Symbol;Acc:MGI:1298387]
Trpv4	ENSMUSG00000014158	1027.36	0.646706	0.000653887	transient receptor potential cation channel, subfamily V, member 4 [Source:MGI Symbol;Acc:MGI:1926945]
Myoz3	ENSMUSG00000049173	272.876	0.54741	0.000667138	myozenin 3 [Source:MGI Symbol;Acc:MGI:2179296]
Foxc1	ENSMUSG00000050295	392.37	0.651652	0.000714853	forkhead box C1 [Source:MGI Symbol;Acc:MGI:1347466]
A630001G21Rik	ENSMUSG00000052760	70.2896	0.572869	0.000720512	RIKEN cDNA A630001G21 gene [Source:MGI Symbol;Acc:MGI:2443131]
Mgmt	ENSMUSG00000054612	98.7752	0.569175	0.000777715	O-6-methylguanine-DNA methyltransferase [Source:MGI Symbol;Acc:MGI:96977]
Klk1b26	ENSMUSG00000053719	52.3416	0.367704	0.000793233	kallikrein 1-related petidase b26 [Source:MGI Symbol;Acc:MGI:891981]
Cytl1	ENSMUSG00000062329	408.839	0.501561	0.000793233	cytokine-like 1 [Source:MGI Symbol;Acc:MGI:2684993]
Zswim7	ENSMUSG00000014243	137.618	0.605493	0.000802142	zinc finger SWIM-type containing 7 [Source:MGI Symbol;Acc:MGI:1916997]
Il3ra	ENSMUSG00000068758	87.4571	0.527428	0.000806944	interleukin 3 receptor, alpha chain [Source:MGI Symbol;Acc:MGI:96553]
Aldh1a1	ENSMUSG00000053279	301.543	0.611336	0.000834472	aldehyde dehydrogenase family 1, subfamily A1 [Source:MGI Symbol;Acc:MGI:1353450]
Samd14	ENSMUSG00000047181	140.521	0.593709	0.000858593	sterile alpha motif domain containing 14 [Source:MGI Symbol;Acc:MGI:2384945]
Gm15446	ENSMUSG00000090015	277.292	0.619305	0.000865666	predicted gene 15446 [Source:MGI Symbol;Acc:MGI:3709333]
Sox12	ENSMUSG00000051817	263.612	0.625255	0.000881694	SRY (sex determining region Y)-box 12 [Source:MGI Symbol;Acc:MGI:98360]
Lrrc31	ENSMUSG00000074653	59.3506	0.437111	0.000893303	leucine rich repeat containing 31 [Source:MGI Symbol;Acc:MGI:2443864]
Clec10a	ENSMUSG00000000318	305.774	0.570231	0.000894661	C-type lectin domain family 10, member A [Source:MGI Symbol;Acc:MGI:96975]
Glmn	ENSMUSG00000029276	213.04	0.66204	0.000907834	glomulin, FKBP associated protein [Source:MGI Symbol;Acc:MGI:2141180]
Haus4	ENSMUSG00000022177	303.714	0.662245	0.000922608	HAUS augmin-like complex, subunit 4 [Source:MGI Symbol;Acc:MGI:1261794]
Ankrd6	ENSMUSG00000040183	110.539	0.622307	0.00092794	ankyrin repeat domain 6 [Source:MGI Symbol;Acc:MGI:2154278]
Fam161a	ENSMUSG00000049811	79.8059	0.589058	0.000954209	family with sequence similarity 161, member A [Source:MGI Symbol;Acc:MGI:1921123]
Dact3	ENSMUSG00000078794	202.354	0.575604	0.000986819	dishevelled-binding antagonist of beta-catenin 3 [Source:MGI Symbol;Acc:MGI:3654828]
Adam33	ENSMUSG00000027318	607.32	0.597291	0.000995718	a disintegrin and metallopeptidase domain 33 [Source:MGI Symbol;Acc:MGI:1341813]
Per3	ENSMUSG00000028957	1399.2	0.649247	0.00100866	period circadian clock 3 [Source:MGI Symbol;Acc:MGI:1277134]
Slco4a1	ENSMUSG00000038963	285.764	0.650658	0.00102255	solute carrier organic anion transporter family, member 4a1 [Source:MGI Symbol;Acc:MGI:1351866]
Basp1	ENSMUSG00000045763	70.3356	0.528221	0.0010319	brain abundant, membrane attached signal protein 1 [Source:MGI Symbol;Acc:MGI:1917600]
Cilp	ENSMUSG00000042254	2612.87	0.383289	0.00104036	cartilage intermediate layer protein, nucleotide pyrophosphohydrolase [Source:MGI Symbol;Acc:MGI:2444507]
mt-Atp6	ENSMUSG00000064357	112520	0.594658	0.00104334	mitochondrially encoded ATP synthase 6 [Source:MGI Symbol;Acc:MGI:99927]
Car3	ENSMUSG00000027559	12150.6	0.623608	0.00105908	carbonic anhydrase 3 [Source:MGI Symbol;Acc:MGI:88270]
Adamtsl3	ENSMUSG00000070469	124.132	0.598323	0.00106373	ADAMTS-like 3 [Source:MGI Symbol;Acc:MGI:3028499]
Slf1	ENSMUSG00000021597	230.945	0.578326	0.00107326	SMC5-SMC6 complex localization factor 1 [Source:MGI Symbol;Acc:MGI:2145448]
Ccdc62	ENSMUSG00000061882	130.313	0.652716	0.00110813	coiled-coil domain containing 62 [Source:MGI Symbol;Acc:MGI:2684996]
Plscr4	ENSMUSG00000032377	624.538	0.658185	0.00110813	phospholipid scramblase 4 [Source:MGI Symbol;Acc:MGI:2143267]
Pld4	ENSMUSG00000052160	256.529	0.570133	0.00111208	phospholipase D family, member 4 [Source:MGI Symbol;Acc:MGI:2144765]
Ccl6	ENSMUSG00000018927	1177.63	0.633716	0.0011269	chemokine (C-C motif) ligand 6 [Source:MGI Symbol;Acc:MGI:98263]
Kif26a	ENSMUSG00000021294	731.936	0.58143	0.00116603	kinesin family member 26A [Source:MGI Symbol;Acc:MGI:2447072]
Gstt2	ENSMUSG00000033318	124.812	0.573787	0.0011662	glutathione S-transferase, theta 2 [Source:MGI Symbol;Acc:MGI:106188]
AC153134.1	ENSMUSG00000114133	591.997	0.65054	0.00116931
Pyroxd2	ENSMUSG00000060224	87.582	0.584205	0.00117011	pyridine nucleotide-disulphide oxidoreductase domain 2 [Source:MGI Symbol;Acc:MGI:1921830]
Lrrc17	ENSMUSG00000039883	165.479	0.582288	0.00119233	leucine rich repeat containing 17 [Source:MGI Symbol;Acc:MGI:1921761]
Shc4	ENSMUSG00000035109	106.314	0.604631	0.00126501	SHC (Src homology 2 domain containing) family, member 4 [Source:MGI Symbol;Acc:MGI:2655364]
Htra3	ENSMUSG00000029096	1622.51	0.657161	0.00127839	HtrA serine peptidase 3 [Source:MGI Symbol;Acc:MGI:1925808]
Mest	ENSMUSG00000051855	51.0492	0.396827	0.00129505	mesoderm specific transcript [Source:MGI Symbol;Acc:MGI:96968]
Syt3	ENSMUSG00000030731	132.992	0.598823	0.00132126	synaptotagmin III [Source:MGI Symbol;Acc:MGI:99665]
Nudt11	ENSMUSG00000073295	141.222	0.574158	0.00133429	nudix (nucleoside diphosphate linked moiety X)-type motif 11 [Source:MGI Symbol;Acc:MGI:1930957]
Stmn2	ENSMUSG00000027500	305.528	0.621496	0.00134157	stathmin-like 2 [Source:MGI Symbol;Acc:MGI:98241]
Plekhb1	ENSMUSG00000030701	691.415	0.652604	0.00134169	pleckstrin homology domain containing, family B (evectins) member 1 [Source:MGI Symbol;Acc:MGI:1351469]
Ephx4	ENSMUSG00000033805	99.436	0.59024	0.00140676	epoxide hydrolase 4 [Source:MGI Symbol;Acc:MGI:2686228]
Aldh1a2	ENSMUSG00000013584	114.711	0.507097	0.0014104	aldehyde dehydrogenase family 1, subfamily A2 [Source:MGI Symbol;Acc:MGI:107928]
Hic1	ENSMUSG00000043099	166.697	0.562997	0.00143728	hypermethylated in cancer 1 [Source:MGI Symbol;Acc:MGI:1338010]
Apol6	ENSMUSG00000033576	177.744	0.546206	0.00147291	apolipoprotein L 6 [Source:MGI Symbol;Acc:MGI:1919189]
Slc9a2	ENSMUSG00000026062	140.494	0.636334	0.00147291	solute carrier family 9 (sodium/hydrogen exchanger), member 2 [Source:MGI Symbol;Acc:MGI:105075]
Mgat3	ENSMUSG00000042428	293.63	0.629032	0.00147416	mannoside acetylglucosaminyltransferase 3 [Source:MGI Symbol;Acc:MGI:104532]
Ctso	ENSMUSG00000028015	237.386	0.646256	0.00148153	cathepsin O [Source:MGI Symbol;Acc:MGI:2139628]
DXBay18	ENSMUSG00000071745	63.1711	0.597006	0.00151987	DNA segment, Chr X, Baylor 18 [Source:MGI Symbol;Acc:MGI:99870]
Dnaaf3	ENSMUSG00000055809	73.2561	0.608997	0.00157043	dynein, axonemal assembly factor 3 [Source:MGI Symbol;Acc:MGI:3588207]
Wnt6	ENSMUSG00000033227	117.757	0.63663	0.00159232	wingless-type MMTV integration site family, member 6 [Source:MGI Symbol;Acc:MGI:98960]
Ctss	ENSMUSG00000038642	965.56	0.584091	0.00160426	cathepsin S [Source:MGI Symbol;Acc:MGI:107341]
Plcd4	ENSMUSG00000026173	67.3895	0.481894	0.00161022	phospholipase C, delta 4 [Source:MGI Symbol;Acc:MGI:107469]
Nceh1	ENSMUSG00000027698	185.662	0.653527	0.00164569	neutral cholesterol ester hydrolase 1 [Source:MGI Symbol;Acc:MGI:2443191]
Itpka	ENSMUSG00000027296	98.2018	0.616239	0.00167448	inositol 1,4,5-trisphosphate 3-kinase A [Source:MGI Symbol;Acc:MGI:1333822]
Cav2	ENSMUSG00000000058	1215.58	0.64442	0.00168325	caveolin 2 [Source:MGI Symbol;Acc:MGI:107571]
Zfp932	ENSMUSG00000066613	398.667	0.665177	0.00168697	zinc finger protein 932 [Source:MGI Symbol;Acc:MGI:1916754]
Nsg1	ENSMUSG00000029126	186.768	0.631057	0.00169214	neuron specific gene family member 1 [Source:MGI Symbol;Acc:MGI:109149]
Ctgf	ENSMUSG00000019997	2442.69	0.593185	0.00173209	connective tissue growth factor [Source:MGI Symbol;Acc:MGI:95537]
Mpeg1	ENSMUSG00000046805	215.242	0.491015	0.00173286	macrophage expressed gene 1 [Source:MGI Symbol;Acc:MGI:1333743]
Itga4	ENSMUSG00000027009	82.5476	0.557098	0.00174103	integrin alpha 4 [Source:MGI Symbol;Acc:MGI:96603]
Padi2	ENSMUSG00000028927	342.192	0.586815	0.00174474	peptidyl arginine deiminase, type II [Source:MGI Symbol;Acc:MGI:1338892]
Enkd1	ENSMUSG00000013155	207.523	0.659477	0.00179469	enkurin domain containing 1 [Source:MGI Symbol;Acc:MGI:2142593]
Slc5a8	ENSMUSG00000020062	405.112	0.591834	0.00181485	solute carrier family 5 (iodide transporter), member 8 [Source:MGI Symbol;Acc:MGI:2384916]
Adgre1	ENSMUSG00000004730	174.096	0.542421	0.00188932	adhesion G protein-coupled receptor E1 [Source:MGI Symbol;Acc:MGI:106912]
Efcab1	ENSMUSG00000068617	155.21	0.609687	0.00189683	EF hand calcium binding domain 1 [Source:MGI Symbol;Acc:MGI:1914043]
Chp2	ENSMUSG00000030865	206.102	0.608335	0.001931	calcineurin-like EF hand protein 2 [Source:MGI Symbol;Acc:MGI:1917511]
D630003M21Rik	ENSMUSG00000037813	74.674	0.567523	0.00196356	RIKEN cDNA D630003M21 gene [Source:MGI Symbol;Acc:MGI:3606579]
Ptafr	ENSMUSG00000056529	121.275	0.609349	0.0020053	platelet-activating factor receptor [Source:MGI Symbol;Acc:MGI:106066]
Ap1s2	ENSMUSG00000031367	254.981	0.610801	0.00221714	adaptor-related protein complex 1, sigma 2 subunit [Source:MGI Symbol;Acc:MGI:1889383]
Fam57b	ENSMUSG00000058966	292.831	0.626513	0.00226775	family with sequence similarity 57, member B [Source:MGI Symbol;Acc:MGI:1916202]
Apbb1ip	ENSMUSG00000026786	198.073	0.617384	0.00228202	amyloid beta (A4) precursor protein-binding, family B, member 1 interacting protein [Source:MGI Symbol;Acc:MGI:1861354]
Chd5	ENSMUSG00000005045	88.1693	0.569606	0.00229808	chromodomain helicase DNA binding protein 5 [Source:MGI Symbol;Acc:MGI:3036258]
Gatm	ENSMUSG00000027199	448.628	0.651005	0.00231809	glycine amidinotransferase (L-arginine:glycine amidinotransferase) [Source:MGI Symbol;Acc:MGI:1914342]
Cul9	ENSMUSG00000040327	443.036	0.618019	0.00232537	cullin 9 [Source:MGI Symbol;Acc:MGI:1925559]
Zfhx3	ENSMUSG00000038872	190.449	0.658895	0.00233556	zinc finger homeobox 3 [Source:MGI Symbol;Acc:MGI:99948]
Cd300ld4	ENSMUSG00000069609	79.45	0.529651	0.00242506	CD300 molecule like family member D4 [Source:MGI Symbol;Acc:MGI:3702658]
Zfp946	ENSMUSG00000071266	170.823	0.629407	0.00243224	zinc finger protein 946 [Source:MGI Symbol;Acc:MGI:1921399]
6030419C18Rik	ENSMUSG00000066607	185.237	0.637426	0.00256049	RIKEN cDNA 6030419C18 gene [Source:MGI Symbol;Acc:MGI:2442108]
Msx1	ENSMUSG00000048450	188.338	0.63096	0.00256236	msh homeobox 1 [Source:MGI Symbol;Acc:MGI:97168]
Fibin	ENSMUSG00000074971	160.377	0.532679	0.00257559	fin bud initiation factor homolog (zebrafish) [Source:MGI Symbol;Acc:MGI:1914856]
Egr2	ENSMUSG00000037868	156.942	0.576809	0.00263949	early growth response 2 [Source:MGI Symbol;Acc:MGI:95296]
Gdf10	ENSMUSG00000021943	1018.32	0.577773	0.00269653	growth differentiation factor 10 [Source:MGI Symbol;Acc:MGI:95684]
Bmi1	ENSMUSG00000026739	387.862	0.654279	0.00285401	Bmi1 polycomb ring finger oncogene [Source:MGI Symbol;Acc:MGI:88174]
Myl3	ENSMUSG00000059741	146.066	0.476757	0.00291267	myosin, light polypeptide 3 [Source:MGI Symbol;Acc:MGI:97268]
Ankrd37	ENSMUSG00000050914	242.268	0.600097	0.00312553	ankyrin repeat domain 37 [Source:MGI Symbol;Acc:MGI:3603344]
Snx10	ENSMUSG00000038301	141.625	0.653973	0.00316417	sorting nexin 10 [Source:MGI Symbol;Acc:MGI:1919232]
Zfp810	ENSMUSG00000066829	222.938	0.634903	0.0031963	zinc finger protein 810 [Source:MGI Symbol;Acc:MGI:2384563]
Sgce	ENSMUSG00000004631	309.676	0.655578	0.00320843	sarcoglycan, epsilon [Source:MGI Symbol;Acc:MGI:1329042]
Lum	ENSMUSG00000036446	806.328	0.591471	0.00325128	lumican [Source:MGI Symbol;Acc:MGI:109347]
Man1c1	ENSMUSG00000037306	350.1	0.646696	0.00325128	mannosidase, alpha, class 1C, member 1 [Source:MGI Symbol;Acc:MGI:2446214]
Robo2	ENSMUSG00000052516	145.788	0.600269	0.0033263	roundabout guidance receptor 2 [Source:MGI Symbol;Acc:MGI:1890110]
Gsg1l	ENSMUSG00000046182	69.8827	0.609967	0.003338	GSG1-like [Source:MGI Symbol;Acc:MGI:2685483]
Nkd1	ENSMUSG00000031661	192.943	0.625038	0.00333826	naked cuticle 1 homolog (Drosophila) [Source:MGI Symbol;Acc:MGI:2135954]
Smoc1	ENSMUSG00000021136	154.638	0.628546	0.00334835	SPARC related modular calcium binding 1 [Source:MGI Symbol;Acc:MGI:1929878]
H2-M3	ENSMUSG00000016206	63.2798	0.56611	0.0033514	histocompatibility 2, M region locus 3 [Source:MGI Symbol;Acc:MGI:95915]
Runx2	ENSMUSG00000039153	65.4955	0.598289	0.00338733	runt related transcription factor 2 [Source:MGI Symbol;Acc:MGI:99829]
Prkcz	ENSMUSG00000029053	168.138	0.660026	0.00348739	protein kinase C, zeta [Source:MGI Symbol;Acc:MGI:97602]
Clec4a1	ENSMUSG00000049037	87.1561	0.577814	0.00350744	C-type lectin domain family 4, member a1 [Source:MGI Symbol;Acc:MGI:3036291]
Plcl2	ENSMUSG00000038910	249.003	0.658213	0.00353559	phospholipase C-like 2 [Source:MGI Symbol;Acc:MGI:1352756]
Zfp942	ENSMUSG00000071267	167.929	0.545349	0.00357723	zinc finger protein 942 [Source:MGI Symbol;Acc:MGI:1920483]
Cmpk2	ENSMUSG00000020638	61.1688	0.571161	0.00361976	cytidine monophosphate (UMP-CMP) kinase 2, mitochondrial [Source:MGI Symbol;Acc:MGI:99830]
Cryba4	ENSMUSG00000066975	65.0455	0.589309	0.00364387	crystallin, beta A4 [Source:MGI Symbol;Acc:MGI:102716]
Fam46c	ENSMUSG00000044468	131.453	0.625617	0.00376123	family with sequence similarity 46, member C [Source:MGI Symbol;Acc:MGI:1921895]
Hpse2	ENSMUSG00000074852	68.7725	0.526584	0.00383403	heparanase 2 [Source:MGI Symbol;Acc:MGI:2685814]
Inpp4b	ENSMUSG00000037940	62.6647	0.539409	0.00387554	inositol polyphosphate-4-phosphatase, type II [Source:MGI Symbol;Acc:MGI:2158925]
Bik	ENSMUSG00000016758	102.495	0.659829	0.00396213	BCL2-interacting killer [Source:MGI Symbol;Acc:MGI:1206591]
Abca6	ENSMUSG00000044749	67.5743	0.529272	0.00401578	ATP-binding cassette, sub-family A (ABC1), member 6 [Source:MGI Symbol;Acc:MGI:1923434]
Loxl3	ENSMUSG00000000693	296.133	0.602676	0.00401578	lysyl oxidase-like 3 [Source:MGI Symbol;Acc:MGI:1337004]
Glis2	ENSMUSG00000014303	444.768	0.646831	0.00403695	GLIS family zinc finger 2 [Source:MGI Symbol;Acc:MGI:1932535]
Fam221a	ENSMUSG00000047115	260.108	0.580521	0.00407391	family with sequence similarity 221, member A [Source:MGI Symbol;Acc:MGI:2442161]
Tnfrsf11b	ENSMUSG00000063727	55.4716	0.478954	0.00415866	tumor necrosis factor receptor superfamily, member 11b (osteoprotegerin) [Source:MGI Symbol;Acc:MGI:109587]
Begain	ENSMUSG00000040867	90.8469	0.60715	0.00428929	brain-enriched guanylate kinase-associated [Source:MGI Symbol;Acc:MGI:3044626]
Cytip	ENSMUSG00000026832	191.892	0.600542	0.00431404	cytohesin 1 interacting protein [Source:MGI Symbol;Acc:MGI:2183535]
Slc40a1	ENSMUSG00000025993	382.367	0.666639	0.00461466	solute carrier family 40 (iron-regulated transporter), member 1 [Source:MGI Symbol;Acc:MGI:1315204]
Olfr920	ENSMUSG00000061039	71.998	0.551785	0.00483474	olfactory receptor 920 [Source:MGI Symbol;Acc:MGI:3030754]
Eid2b	ENSMUSG00000070705	69.746	0.619272	0.0049277	EP300 interacting inhibitor of differentiation 2B [Source:MGI Symbol;Acc:MGI:1924095]
Htr1d	ENSMUSG00000070687	60.2635	0.553175	0.00493944	5-hydroxytryptamine (serotonin) receptor 1D [Source:MGI Symbol;Acc:MGI:96276]
Itih2	ENSMUSG00000037254	57.5603	0.469315	0.00512349	inter-alpha trypsin inhibitor, heavy chain 2 [Source:MGI Symbol;Acc:MGI:96619]
Hhip	ENSMUSG00000064325	255.369	0.643232	0.005218	Hedgehog-interacting protein [Source:MGI Symbol;Acc:MGI:1341847]
Mapt	ENSMUSG00000018411	272.743	0.646857	0.00533697	microtubule-associated protein tau [Source:MGI Symbol;Acc:MGI:97180]
Dsel	ENSMUSG00000038702	258.246	0.642425	0.00539316	dermatan sulfate epimerase-like [Source:MGI Symbol;Acc:MGI:2442948]
Pole2	ENSMUSG00000020974	100.959	0.662731	0.00540073	polymerase (DNA directed), epsilon 2 (p59 subunit) [Source:MGI Symbol;Acc:MGI:1197514]
Gbp6	ENSMUSG00000104713	188.555	0.638361	0.00544825	guanylate binding protein 6 [Source:MGI Symbol;Acc:MGI:2140937]
Aldh3b1	ENSMUSG00000024885	132.403	0.65666	0.00560344	aldehyde dehydrogenase 3 family, member B1 [Source:MGI Symbol;Acc:MGI:1914939]
Gm12355	ENSMUSG00000078134	372.925	0.546474	0.00566248	predicted gene 12355 [Source:MGI Symbol;Acc:MGI:3649769]
Mybpc1	ENSMUSG00000020061	15734.7	0.654464	0.00566958	myosin binding protein C, slow-type [Source:MGI Symbol;Acc:MGI:1336213]
Lpar3	ENSMUSG00000036832	136.288	0.588804	0.00574184	lysophosphatidic acid receptor 3 [Source:MGI Symbol;Acc:MGI:1929469]
Srpx2	ENSMUSG00000031253	204.009	0.591963	0.00578484	sushi-repeat-containing protein, X-linked 2 [Source:MGI Symbol;Acc:MGI:1916042]
Sacs	ENSMUSG00000048279	137.439	0.616463	0.00578904	sacsin [Source:MGI Symbol;Acc:MGI:1354724]
1500015O10Rik	ENSMUSG00000026051	68.8621	0.566874	0.0058488	RIKEN cDNA 1500015O10 gene [Source:MGI Symbol;Acc:MGI:1926146]
Tgfbr3l	ENSMUSG00000089736	116.593	0.626001	0.00596596	transforming growth factor, beta receptor III-like [Source:MGI Symbol;Acc:MGI:3833469]
Sh3bgrl	ENSMUSG00000031246	519.083	0.598635	0.00621828	SH3-binding domain glutamic acid-rich protein like [Source:MGI Symbol;Acc:MGI:1930849]
Uchl1	ENSMUSG00000029223	181.267	0.636457	0.00631058	ubiquitin carboxy-terminal hydrolase L1 [Source:MGI Symbol;Acc:MGI:103149]
Tmem98	ENSMUSG00000035413	74.5948	0.568163	0.00664175	transmembrane protein 98 [Source:MGI Symbol;Acc:MGI:1923457]
Gjc3	ENSMUSG00000056966	68.4513	0.566331	0.00680621	gap junction protein, gamma 3 [Source:MGI Symbol;Acc:MGI:2153041]
Trem2	ENSMUSG00000023992	89.0595	0.505217	0.00682493	triggering receptor expressed on myeloid cells 2 [Source:MGI Symbol;Acc:MGI:1913150]
Vipr2	ENSMUSG00000011171	63.7075	0.507048	0.00720102	vasoactive intestinal peptide receptor 2 [Source:MGI Symbol;Acc:MGI:107166]
Lyl1	ENSMUSG00000034041	106.537	0.651644	0.00736368	lymphoblastomic leukemia 1 [Source:MGI Symbol;Acc:MGI:96891]
Col8a2	ENSMUSG00000056174	89.0705	0.63912	0.00757696	collagen, type VIII, alpha 2 [Source:MGI Symbol;Acc:MGI:88464]
Pamr1	ENSMUSG00000027188	125.991	0.631389	0.00760478	peptidase domain containing associated with muscle regeneration 1 [Source:MGI Symbol;Acc:MGI:2445082]
C1qtnf4	ENSMUSG00000040794	131.459	0.657091	0.00764716	C1q and tumor necrosis factor related protein 4 [Source:MGI Symbol;Acc:MGI:1914695]
Wscd2	ENSMUSG00000063430	52.523	0.610928	0.00774663	WSC domain containing 2 [Source:MGI Symbol;Acc:MGI:2445030]
Sdhaf3	ENSMUSG00000042505	197.011	0.661786	0.00779879	succinate dehydrogenase complex assembly factor 3 [Source:MGI Symbol;Acc:MGI:1913288]
Dact1	ENSMUSG00000044548	126.205	0.644847	0.00787302	dishevelled-binding antagonist of beta-catenin 1 [Source:MGI Symbol;Acc:MGI:1891740]
Stum	ENSMUSG00000053963	104.702	0.629508	0.00790209	mechanosensory transduction mediator [Source:MGI Symbol;Acc:MGI:2138735]
Cadps2	ENSMUSG00000017978	81.9536	0.651688	0.00817477	Ca2+-dependent activator protein for secretion 2 [Source:MGI Symbol;Acc:MGI:2443963]
Cfh	ENSMUSG00000026365	952.843	0.659494	0.00844936	complement component factor h [Source:MGI Symbol;Acc:MGI:88385]
Tnni3	ENSMUSG00000035458	73.9395	0.621405	0.00891029	troponin I, cardiac 3 [Source:MGI Symbol;Acc:MGI:98783]
Rnf157	ENSMUSG00000052949	104.495	0.652036	0.00928803	ring finger protein 157 [Source:MGI Symbol;Acc:MGI:2442484]
Lrrc30	ENSMUSG00000073375	255.258	0.574991	0.00937504	leucine rich repeat containing 30 [Source:MGI Symbol;Acc:MGI:2685172]
Creb5	ENSMUSG00000053007	462.687	0.646817	0.00974917	cAMP responsive element binding protein 5 [Source:MGI Symbol;Acc:MGI:2443973]
	FC>1.5; Basemean>50; padj<0.01; protein coding

## Sheet: Dn in O--"SWG-enriched"
Gene_Name	Gene_ID	baseMean	FC (Y/O)	padj	Description
Oit1	ENSMUSG00000021749	59.1368	2.63617	6.42e-05	oncoprotein induced transcript 1 [Source:MGI Symbol;Acc:MGI:1201784]
Foxi1	ENSMUSG00000047861	1092.67	2.06685	5.56e-13	forkhead box I1 [Source:MGI Symbol;Acc:MGI:1096329]
Ret	ENSMUSG00000030110	431.258	1.97768	2.11e-13	ret proto-oncogene [Source:MGI Symbol;Acc:MGI:97902]
Slc26a4	ENSMUSG00000020651	126.509	1.96263	6.18e-07	solute carrier family 26, member 4 [Source:MGI Symbol;Acc:MGI:1346029]
Plin2	ENSMUSG00000028494	3958.47	1.92212	8.35e-16	perilipin 2 [Source:MGI Symbol;Acc:MGI:87920]
Epha7	ENSMUSG00000028289	71.7525	1.91854	0.00063805	Eph receptor A7 [Source:MGI Symbol;Acc:MGI:95276]
Chrm3	ENSMUSG00000046159	254.297	1.77596	6.95e-07	cholinergic receptor, muscarinic 3, cardiac [Source:MGI Symbol;Acc:MGI:88398]
Ccdc160	ENSMUSG00000073207	58.8064	1.75744	0.00167448	coiled-coil domain containing 160 [Source:MGI Symbol;Acc:MGI:3588225]
St8sia6	ENSMUSG00000003418	157.127	1.74098	5.02e-05	ST8 alpha-N-acetyl-neuraminide alpha-2,8-sialyltransferase 6 [Source:MGI Symbol;Acc:MGI:2386797]
Foxa1	ENSMUSG00000035451	59.2985	1.59428	0.00470007	forkhead box A1 [Source:MGI Symbol;Acc:MGI:1347472]
Atp2a3	ENSMUSG00000020788	15718.1	1.53451	5.97e-07	ATPase, Ca++ transporting, ubiquitous [Source:MGI Symbol;Acc:MGI:1194503]
Phlda1	ENSMUSG00000020205	2004.94	1.52679	0.000893303	pleckstrin homology like domain, family A, member 1 [Source:MGI Symbol;Acc:MGI:1096880]
Best2	ENSMUSG00000052819	566.652	1.46361	0.0118833	bestrophin 2 [Source:MGI Symbol;Acc:MGI:2387588]

## Sheet: Up in O--"SWG-enriched"
Gene_Name	Gene_ID	baseMean	FC (Y/O)	padj	Description
Wfdc18	ENSMUSG00000000983	3319.68	0.331904	2.36e-05	WAP four-disulfide core domain 18 [Source:MGI Symbol;Acc:MGI:107506]
Kif26b	ENSMUSG00000026494	146.812	0.489375	3.87e-05	kinesin family member 26B [Source:MGI Symbol;Acc:MGI:2447076]
Bpifb3	ENSMUSG00000068008	599.128	0.519699	8.94e-08	BPI fold containing family B, member 3 [Source:MGI Symbol;Acc:MGI:2675077]
Dact2	ENSMUSG00000048826	297.235	0.530581	2.62e-06	dishevelled-binding antagonist of beta-catenin 2 [Source:MGI Symbol;Acc:MGI:1920347]
Stra6	ENSMUSG00000032327	937.375	0.55803	1.58e-14	stimulated by retinoic acid gene 6 [Source:MGI Symbol;Acc:MGI:107742]
Rhcg	ENSMUSG00000030549	249.993	0.574109	2e-09	Rhesus blood group-associated C glycoprotein [Source:MGI Symbol;Acc:MGI:1888517]
Cryba4	ENSMUSG00000066975	65.0455	0.589309	0.00364387	crystallin, beta A4 [Source:MGI Symbol;Acc:MGI:102716]
Wfdc2	ENSMUSG00000017723	1288.61	0.589785	3.24e-05	WAP four-disulfide core domain 2 [Source:MGI Symbol;Acc:MGI:1914951]
Slc5a8	ENSMUSG00000020062	405.112	0.591834	0.00181485	solute carrier family 5 (iodide transporter), member 8 [Source:MGI Symbol;Acc:MGI:2384916]
Runx2	ENSMUSG00000039153	65.4955	0.598289	0.00338733	runt related transcription factor 2 [Source:MGI Symbol;Acc:MGI:99829]
Gsg1l	ENSMUSG00000046182	69.8827	0.609967	0.003338	GSG1-like [Source:MGI Symbol;Acc:MGI:2685483]
Vtcn1	ENSMUSG00000051076	113.646	0.613944	0.000590901	V-set domain containing T cell activation inhibitor 1 [Source:MGI Symbol;Acc:MGI:3039619]
Nkd2	ENSMUSG00000021567	1800.46	0.639445	0.00024282	naked cuticle 2 homolog (Drosophila) [Source:MGI Symbol;Acc:MGI:1919543]
Foxc1	ENSMUSG00000050295	392.37	0.651652	0.000714853	forkhead box C1 [Source:MGI Symbol;Acc:MGI:1347466]
Cadps2	ENSMUSG00000017978	81.9536	0.651688	0.00817477	Ca2+-dependent activator protein for secretion 2 [Source:MGI Symbol;Acc:MGI:2443963]

## Sheet: Dn in O--"Secretory-Core"
Gene_Name	Gene_ID	baseMean	FC (Y/O)	padj	Description
Foxi1	ENSMUSG00000047861	1092.67	2.06685	5.56e-13	forkhead box I1 [Source:MGI Symbol;Acc:MGI:1096329]
Slc26a4	ENSMUSG00000020651	126.509	1.96263	6.18e-07	solute carrier family 26, member 4 [Source:MGI Symbol;Acc:MGI:1346029]
Chrm3	ENSMUSG00000046159	254.297	1.77596	6.95e-07	cholinergic receptor, muscarinic 3, cardiac [Source:MGI Symbol;Acc:MGI:88398]
Foxa1	ENSMUSG00000035451	59.2985	1.59428	0.00470007	forkhead box A1 [Source:MGI Symbol;Acc:MGI:1347472]
Atp2a3	ENSMUSG00000020788	15718.1	1.53451	5.97e-07	ATPase, Ca++ transporting, ubiquitous [Source:MGI Symbol;Acc:MGI:1194503]
Best2	ENSMUSG00000052819	566.652	1.46361	0.0118833	bestrophin 2 [Source:MGI Symbol;Acc:MGI:2387588]

## Sheet: Up in O--"Secretory-Core"
Gene_Name	Gene_ID	baseMean	FC (Y/O)	padj	Description
Rhcg	ENSMUSG00000030549	249.993	0.574109	2e-09	Rhesus blood group-associated C glycoprotein [Source:MGI Symbol;Acc:MGI:1888517]
Slc5a8	ENSMUSG00000020062	405.112	0.591834	0.00181485	solute carrier family 5 (iodide transporter), member 8 [Source:MGI Symbol;Acc:MGI:2384916]
Gsg1l	ENSMUSG00000046182	69.8827	0.609967	0.003338	GSG1-like [Source:MGI Symbol;Acc:MGI:2685483]
Foxc1	ENSMUSG00000050295	392.37	0.651652	0.000714853	forkhead box C1 [Source:MGI Symbol;Acc:MGI:1347466]
Cadps2	ENSMUSG00000017978	81.9536	0.651688	0.00817477	Ca2+-dependent activator protein for secretion 2 [Source:MGI Symbol;Acc:MGI:2443963]
